# Supplementary material
Source: publisher figshare collection journal article supplement (https://acs.figshare.com/ndownloader/files/6759252)
Supplement: Supplementary file 1 [file 6759252]

## Sheet: Sheet1
																																																Average L/H ratio, nomalised to condition lacking competitor
Gene names	Protein names	Protein IDs	Majority protein IDs	Ratio L/H _0, n=1	Ratio L/H _0, n=2	Ratio L/H _0, n=3	Ratio L/H _0.125, n=1	Ratio L/H _0.125, n=2	Ratio L/H _0.125, n=3	Ratio L/H _0.625, n=1	Ratio L/H _0.625, n=2	Ratio L/H _0.625, n=3	Ratio L/H_5.0, n=1	Ratio L/H_5.0, n=2	Ratio L/H_5.0, n=3	Ratio L/H_10.0, n=1	Ratio L/H_10.0, n=2	Ratio L/H _10.0, n=3	Ratio L/H _5.0 (compound 3), n=1	Ratio L/H _5.0 (compound 3), n=2	Ratio L/H _5.0 (compound 3), n=3	PEP	Intensity	Intensity L	Intensity H	Razor + unique peptides _0, n=1	Razor + unique peptides _0, n=2	Razor + unique peptides _0, n=3	Razor + unique peptides _0.125, n=1	Razor + unique peptides _0.125, n=2	Razor + unique peptides_0.125, n=3	Razor + unique peptides_0.625, n=1	Razor + unique peptides_0.625, n=2	Razor + unique peptides _0.625, n=3	Razor + unique peptides_5.0, n=1	Razor + unique peptides_5.0, n=2	Razor + unique peptides_5.0, n=3	Razor + unique peptide_10.0, n=1	Razor + unique peptides_10.0, n=2	Razor + unique peptides_10.0, n=3	Razor + unique peptides_5.0 (compound 3), n=1	Razor + unique peptides_5.0 (compound 3), n=2	Razor + unique peptides _5.0 (compound 3), n=3	Unique peptides	Sequence coverage [%]	Unique + razor sequence coverage [%]	Mol. weight [kDa]	0	0.125
CRYAB	Alpha-crystallin B chain	A0A024R3B9;E9PR44;P02511;E9PNH7;E9PJL7;E9PRA8;H0YCW8	A0A024R3B9;E9PR44;P02511;E9PNH7;E9PJL7;E9PRA8	-0.3933	NaN	NaN	-0.866719	-0.798188	-0.373746	NaN	NaN	-0.307998	NaN	NaN	NaN	0.233951	0.432389	0.362222	NaN	NaN	NaN	3.2066e-14	151740000	93837000	57907000	2	1	0	2	3	2	1	1	2	1	1	2	2	3	2	0	0	0	5	43.5	43.5	12.253	0	-0.404888
HDLBP	Vigilin	H0Y394;Q00341-2;Q00341;A0A024R4E5;H7C0A4	H0Y394;Q00341-2;Q00341;A0A024R4E5;H7C0A4	NaN	NaN	NaN	NaN	NaN	NaN	NaN	NaN	NaN	NaN	-0.0759458	-1.06442	NaN	NaN	NaN	NaN	NaN	NaN	1.0623e-07	63058000	30432000	32626000	0	0	1	0	0	0	0	0	0	0	2	3	1	1	0	0	0	0	3	3	3	108.73	NaN	NaN
RPS9	40S ribosomal protein S9	P46781;A0A024R4M0;B5MCT8;C9JM19;F2Z3C0;A8MXK4	P46781;A0A024R4M0;B5MCT8;C9JM19	-0.404869	-0.379123	-0.4479	-0.186972	-0.258477	-0.274135	-0.082676	-0.100427	-0.238443	-0.306556	-0.277821	-0.233869	-0.350214	-0.294223	-0.255427	0.0641382	0.122025	0.146868	1.3283e-152	36507000000	21944000000	14563000000	17	15	15	16	14	15	15	12	15	16	16	15	15	15	16	11	11	10	20	54.1	54.1	22.591	0	0.146392
TXNRD1	Thioredoxin reductase 1, cytoplasmic	E9PIR7;F8W809;Q16881-5;Q16881-2;A0A087WSW9;Q16881-4;E9PNQ6;Q16881-3;Q16881-6;A0A087WSY9;Q16881;E2QRB9;Q16881-7;E9PKD3;E9PLT3;E9PKI4;A0A0B4J225;E9PIZ5;E9PRI8;E9PQI3;A0A096LPD9;E7EWK1;A0A096LPK7;E7ENA2;Q9NNW7-2;D3YTF8;D3YTF9;Q9NNW7	E9PIR7;F8W809;Q16881-5;Q16881-2;A0A087WSW9;Q16881-4;E9PNQ6;Q16881-3;Q16881-6;A0A087WSY9;Q16881;E2QRB9;Q16881-7	1.16595	0.707395	0.733062	0.483649	0.467587	0.533097	0.483144	0.556505	0.676797	0.394349	0.111884	0.339414	0.0108406	NaN	0.1856	0.517072	0.321488	0.601201	7.1181e-90	814850000	566430000	248420000	4	3	4	4	3	3	5	2	4	3	2	5	5	1	3	3	2	3	9	25.9	25.9	53.166	0	-0.249413
GPX4	Glutathione peroxidase;Phospholipid hydroperoxide glutathione peroxidase, mitochondrial	K7ERP4;P36969-2;A0A087X2I2;P36969;A0A087WT12;K7EKX7;R4GNE4;K7ENB4;K7EJ20;A0A0A0MTT1;A0A087X247	K7ERP4;P36969-2;A0A087X2I2;P36969;A0A087WT12;K7EKX7;R4GNE4;K7ENB4;K7EJ20;A0A0A0MTT1	1.15893	0.956765	0.973362	0.983767	0.920137	0.650601	0.564814	0.723694	-0.337017	NaN	-1.24843	-0.681437	-0.929262	-1.38626	-1.26118	-0.546224	NaN	NaN	1.1187e-28	428780000	268250000	160520000	5	3	3	4	5	3	6	3	3	1	3	4	2	3	3	2	1	0	7	47.7	47.7	17.629	0	-0.0532249
HMOX2	Heme oxygenase 2	A0A087WT44;P30519;I3L159;I3L1F5;I3L4P8;A0A0K0K1G7;I3L463;I3L276;I3L1Y2	A0A087WT44;P30519;I3L159;I3L1F5	0.335097	0.244586	0.226164	-0.172947	-0.192266	-0.0917084	-1.71372	-1.69235	-1.70755	-4.12351	-4.01875	-4.01024	-5.07336	-4.97879	-4.90748	-0.269326	-0.225585	-0.275903	0	28397000000	12643000000	15754000000	19	18	18	18	19	19	17	18	16	13	11	13	11	11	12	14	17	14	2	65.1	65.1	41.669	0	-0.417533
KHSRP	Far upstream element-binding protein 2	Q92945;A0A087WTP3;M0R0I5;M0QYH3;M0QXW7;M0QYG1;M0R0C6;M0R3J3;M0R251;M0R263	Q92945;A0A087WTP3;M0R0I5	0.0501934	0.101481	0.119591	-0.171281	0.0424407	-0.054322	-0.146749	0.0605444	0.254591	0.312387	0.367993	0.21984	0.414629	0.418358	0.31483	0.0906873	0.156386	-0.0566066	2.6354e-261	4526700000	2446800000	2079800000	12	9	10	14	12	13	11	9	11	17	16	19	15	17	15	13	9	9	18	34.2	34.2	73.114	0	-0.155804
PABPC1;PABPC3	Polyadenylate-binding protein 1;Polyadenylate-binding protein 3	A0A087WTT1;P11940-2;E7ERJ7;P11940;E7EQV3;H0YAR2;Q9H361;H0YB86;H0YBN4;H0YAS7;H0YAS6;H0YB75;Q4VXU2;H0YC10;H0YAP2;E5RGC4;E5RFD8;H0YER0;E5RHG7;E5RGH3;E5RH24;E5RJB9;Q5JQF8;Q4VXU2-2	A0A087WTT1;P11940-2;E7ERJ7;P11940;E7EQV3;H0YAR2;Q9H361	0.092456	-0.10601	0.0260786	0.26233	-0.156612	-0.0385881	NaN	NaN	0.0444897	-0.195058	0.0422806	-0.147596	-0.192358	-0.0561092	-0.0875922	0.126476	0.0581445	-0.0179937	3.3418e-44	630010000	381720000	248290000	3	3	3	4	2	4	1	2	4	6	7	8	11	4	6	3	3	2	8	28.5	28.5	58.535	0	-0.0646667
RPL10	60S ribosomal protein L10	F8W7C6;A0A087WV22;X1WI28;P27635;H7C123;H7C2C5;B8A6G2;A6QRI9;Q96L21	F8W7C6;A0A087WV22;X1WI28;P27635	-0.155364	NaN	-0.225739	-0.0627089	NaN	-0.089789	NaN	NaN	NaN	NaN	NaN	-0.0738444	-0.116481	0.068663	0.0288001	0.000892744	NaN	NaN	5.164e-33	325420000	211790000	113630000	2	1	2	2	1	3	1	1	1	2	1	3	3	2	2	2	1	1	5	24.5	24.5	18.565	0	0.114303
MTHFD1L	Monofunctional C1-tetrahydrofolate synthase, mitochondrial	A0A087WVM4;Q6UB35;B7ZM99;H0Y327;Q6UB35-2;Q4VXM0;Q5JYA8;Q5JYA3;Q4VXM1;Q4VXV2	A0A087WVM4;Q6UB35;B7ZM99	0.210037	0.219343	0.388039	0.545905	0.628895	0.507676	0.375286	0.292062	0.307827	0.284386	0.154525	0.143305	0.215288	0.301135	0.443091	0.266603	0.299582	-0.195717	2.9905e-65	982260000	662140000	320120000	8	4	4	7	5	5	6	3	9	8	6	11	8	8	6	4	3	4	14	19.6	19.6	99.31	0	0.326561
CLTC	Clathrin heavy chain 1	Q00610-2;Q00610;A0A087WVQ6;J3KS13;A0A087WX41;P53675-2;P53675;K7EJJ5;J3KSQ2;J3QL20;J3KRF5;F5H5N6	Q00610-2;Q00610;A0A087WVQ6	-0.269198	-0.197819	-0.232089	-0.0484606	-0.180317	-0.062571	0.0568506	-0.301326	-0.0883008	-0.0772608	-0.0861598	-0.0963612	-0.0893976	-0.163264	-0.0712194	-0.0218012	-0.273981	-0.104007	0	5248100000	3200400000	2047700000	25	14	10	22	11	12	24	17	23	35	23	37	33	28	33	12	8	8	52	37.5	37.5	187.89	0	0.169518
PSMD1	26S proteasome non-ATPase regulatory subunit 1	Q99460-2;Q99460;A0A087WW66;C9J9M4;H7BZR6;H7C378	Q99460-2;Q99460;A0A087WW66	NaN	NaN	NaN	NaN	NaN	NaN	NaN	NaN	NaN	-0.530311	0.158818	-0.123771	0.204856	NaN	-0.161043	NaN	NaN	NaN	2.0842e-45	219670000	128810000	90853000	0	0	1	1	1	0	1	1	0	3	2	2	3	1	2	0	0	0	6	9	9	102.26	NaN	NaN
TPM3;DKFZp686J1372	Tropomyosin alpha-3 chain	A0A087WWU8;P06753-5;P06753-2;Q5HYB6;P06753-4;P06753-3;P06753-6;Q5VU61;J3KN67;D6R904;P06753-7;P06753;D6RFM2;K7EP68;K7ERG3;K7ENT6;P67936;P67936-2;H0YL80;H0YNC7;P09493-2;P09493-5;F5H7S3;P07951-3;H7BYY1;H0YK48;B7Z596;P09493-8;P09493-7;P09493-6;K7EPV9;K7EMU5	A0A087WWU8;P06753-5;P06753-2;Q5HYB6;P06753-4;P06753-3;P06753-6;Q5VU61;J3KN67;D6R904;P06753-7;P06753	0.0478306	-0.248682	0.0142169	-0.281884	-0.0871767	-0.234966	-0.261609	-0.173661	-0.122307	0.202455	0.120128	0.23872	0.39737	0.342171	0.37733	-0.225034	-0.0783111	0.106187	9.3333e-145	1751000000	1088100000	662830000	8	6	5	5	7	7	9	6	5	7	9	9	8	10	10	5	5	5	12	51.1	51.1	26.42	0	-0.249183
TNS1	Tensin-1	H0Y4U1;A0A087WWW7;E9PGF5;E9PF55;Q9HBL0	H0Y4U1;A0A087WWW7;E9PGF5;E9PF55;Q9HBL0	NaN	NaN	NaN	NaN	NaN	NaN	NaN	NaN	NaN	-0.133542	-0.0975478	0.06074	-0.378464	-0.00372651	NaN	NaN	NaN	NaN	6.1745e-11	103090000	63194000	39896000	0	0	1	1	0	0	0	1	0	1	2	3	3	3	1	1	1	0	3	4.3	4.3	89.003	NaN	NaN
RPL17	60S ribosomal protein L17	A0A087WXM6;J3QQT2;J3KRX5;P18621;P18621-3;A0A0A6YYL6;J3KRB3;A0A087WWH0;J3QS96;P18621-2;J3QLC8;A0A0A0MRF8;J3KSJ0;A0A087WY81	A0A087WXM6;J3QQT2;J3KRX5;P18621;P18621-3;A0A0A6YYL6;J3KRB3;A0A087WWH0;J3QS96;P18621-2;J3QLC8;A0A0A0MRF8	NaN	NaN	NaN	NaN	NaN	NaN	NaN	NaN	NaN	-0.277932	-0.518144	0.150247	NaN	NaN	NaN	NaN	NaN	NaN	2.4539e-18	179440000	96055000	83388000	0	0	1	0	0	0	0	1	0	2	2	3	1	0	1	0	0	0	3	23.7	23.7	19.586	NaN	NaN
ESYT2	Extended synaptotagmin-2	H7BXI1;A0FGR8-2;A0FGR8;A0A087WXU3;A0FGR8-6;A0FGR8-5;A0FGR8-4	H7BXI1;A0FGR8-2;A0FGR8;A0A087WXU3;A0FGR8-6;A0FGR8-5;A0FGR8-4	-0.0412441	0.313712	0.294148	NaN	0.396092	0.27358	-0.0330154	-1.65128	-1.26539	0.343056	NaN	0.198634	0.591119	0.0436049	0.341261	NaN	NaN	NaN	7.6293e-32	386230000	223300000	162930000	5	4	4	0	2	3	2	2	2	3	1	3	3	4	4	1	1	1	8	11.2	11.2	98.008	0	0.040688
UGP2	UTP--glucose-1-phosphate uridylyltransferase	Q16851-2;Q16851;A0A087WYS1;E7EUC7;C9JWG0;C9JVG3;C9JQU9;C9JNZ1;F2Z3H1;C9JTZ5;C9JUW1	Q16851-2;Q16851;A0A087WYS1;E7EUC7;C9JWG0;C9JVG3;C9JQU9;C9JNZ1	NaN	NaN	NaN	NaN	NaN	NaN	NaN	NaN	NaN	0.14128	0.211055	0.346013	0.367751	0.347928	0.19829	NaN	NaN	NaN	4.8108e-27	221810000	143790000	78024000	1	0	1	1	1	1	0	0	1	4	3	4	4	3	4	0	0	1	5	10.9	10.9	55.676	NaN	NaN
RECQL4	ATP-dependent DNA helicase Q4	O94761;A0A087WZ30;V9GZ64;A0A087X072;V9GY60;A0A087WTJ0;V9GYA3	O94761;A0A087WZ30;V9GZ64;A0A087X072	-0.150736	0.067961	0.268508	NaN	NaN	NaN	NaN	NaN	-0.01421	-0.225378	-0.305841	-0.00330059	-0.754864	-0.396854	-0.329605	0.545952	0.19274	0.31776	6.0304e-36	362730000	209440000	153290000	4	5	3	1	0	1	0	0	2	6	4	5	5	5	5	2	2	3	7	7.9	7.9	133.08	0	NaN
HNRNPAB	Heterogeneous nuclear ribonucleoprotein A/B	D6R9P3;D6RD18;Q99729-3;D6RBZ0;A0A087WZV1;Q99729-2;Q99729-4;Q99729	D6R9P3;D6RD18;Q99729-3;D6RBZ0;A0A087WZV1;Q99729-2;Q99729-4;Q99729	NaN	NaN	NaN	NaN	NaN	NaN	NaN	NaN	NaN	-0.349159	-0.878792	-0.929266	NaN	NaN	NaN	NaN	NaN	NaN	8.7373e-11	45499000	23083000	22416000	0	0	0	0	0	0	0	0	0	2	2	2	1	1	1	0	0	0	2	9.6	9.6	30.302	NaN	NaN
HNRNPM	Heterogeneous nuclear ribonucleoprotein M	P52272-2;P52272;A0A087X0X3;M0QZM1;M0R019;M0R2I7;M0R2T0;M0QYQ7;M0R0N3;M0R0Y6;M0QY96;M0QYL3	P52272-2;P52272;A0A087X0X3	-0.360661	-0.156738	-0.21673	-0.0709316	0.323584	0.0584666	-0.110778	-0.066203	0.241922	0.00885828	-0.0599302	0.0634021	0.0211208	-0.0261846	0.0742217	-0.143951	0.0130381	0.145397	1.7086e-132	1620500000	1005900000	614550000	3	8	5	6	4	4	4	3	3	11	9	14	13	13	10	5	3	4	23	35.3	35.3	73.62	0	0.275196
CHTOP	Chromatin target of PRMT1 protein	A0A087X1B7;Q9Y3Y2-4;X6R700;Q9Y3Y2;Q9Y3Y2-3;Q5T7Y7	A0A087X1B7;Q9Y3Y2-4;X6R700;Q9Y3Y2;Q9Y3Y2-3;Q5T7Y7	NaN	NaN	NaN	NaN	NaN	NaN	NaN	NaN	NaN	NaN	-1.44461	-1.36872	-1.57088	-1.42166	-1.44515	NaN	NaN	NaN	3.3749e-30	151110000	58836000	92276000	0	0	0	0	0	0	0	0	0	1	2	2	2	2	2	1	0	0	2	38.2	38.2	8.5199	NaN	NaN
SDHA	Succinate dehydrogenase [ubiquinone] flavoprotein subunit, mitochondrial	P31040-3;A0A087X1I3;D6RFM5;P31040-2;P31040;H0Y8X1	P31040-3;A0A087X1I3;D6RFM5;P31040-2;P31040	NaN	NaN	NaN	NaN	NaN	NaN	NaN	NaN	NaN	0.162111	0.91729	NaN	NaN	NaN	0.0853763	NaN	NaN	NaN	1.9656e-15	71088000	46380000	24708000	0	0	1	0	0	0	0	0	0	2	2	1	1	1	2	0	0	0	3	8.3	8.3	56.65	NaN	NaN
YBX1	Nuclease-sensitive element-binding protein 1	A0A087X1S2;P67809;C9J5V9;H0Y449;P16989-2;P16989-3;Q9Y2T7;P16989	A0A087X1S2;P67809;C9J5V9;H0Y449	-0.466793	NaN	NaN	NaN	0.0486741	NaN	0.439948	NaN	NaN	-0.382653	-0.223686	NaN	NaN	NaN	-0.210002	0.354826	0.142871	0.579784	1.9418e-31	198690000	123440000	75249000	2	0	1	1	2	0	3	1	1	2	2	1	1	1	2	2	2	2	5	22.5	22.5	34.656	0	0.515467
PSME2	Proteasome activator complex subunit 2	Q9UL46;A0A087X1Z3;H0YM70;H0YKU2;H0YLG1;H0YLD2	Q9UL46;A0A087X1Z3;H0YM70	-0.0016738	0.242279	0.225985	0.251088	0.162529	0.183645	0.263976	0.167669	0.406493	-0.131075	-0.118653	-0.122003	-0.066335	-0.299375	-0.192239	-0.110021	-0.515911	-0.306599	3.3447e-194	2230100000	1426700000	803360000	8	10	7	7	8	9	7	4	6	8	5	7	7	8	7	3	3	7	12	61.5	61.5	27.401	0	-0.0423397
KIAA1524	Protein CIP2A	Q8TCG1-2;Q8TCG1;A0A087X211	Q8TCG1-2;Q8TCG1;A0A087X211	NaN	NaN	NaN	NaN	NaN	NaN	NaN	NaN	NaN	0.389805	NaN	-0.117261	NaN	0.331524	0.122185	0.127293	NaN	NaN	1.4436e-13	135470000	86406000	49060000	1	1	0	0	1	1	0	1	1	3	1	2	1	2	2	2	1	1	4	5.2	5.2	84.578	NaN	NaN
AP2B1;AP1B1	AP-2 complex subunit beta;AP-1 complex subunit beta-1	P63010-3;A0A087X253;P63010;P63010-2;A0A087WYD1;A0A087WU93;A0A087WZQ6;C9J1E7;Q10567-4;Q10567-3;Q10567-2;Q10567	P63010-3;A0A087X253;P63010;P63010-2;A0A087WYD1;A0A087WU93;A0A087WZQ6;C9J1E7;Q10567-4;Q10567-3;Q10567-2;Q10567	-0.171731	-0.209069	-0.201099	0.0921961	NaN	NaN	NaN	NaN	NaN	-0.0316826	0.211897	0.266494	0.219227	-0.111321	0.370748	NaN	NaN	NaN	3.8001e-21	289250000	190990000	98260000	2	2	3	3	1	1	1	1	1	3	4	5	3	3	3	0	0	0	6	9.2	9.2	98.117	0	0.293295
CNN2	Calponin-2	A0A087X271;B4DDF4;Q99439;B4DUT8;A0A087X1X5;H3BVI6;Q99439-2;K7ES69;H3BQH0;A0A087WV51;U3KPS3	A0A087X271;B4DDF4;Q99439;B4DUT8;A0A087X1X5;H3BVI6;Q99439-2;K7ES69	0.162094	NaN	NaN	0.415475	NaN	NaN	NaN	0.600516	NaN	0.237928	0.458466	0.00861195	NaN	0.473936	0.632914	NaN	NaN	NaN	1.3672e-34	343410000	231820000	111590000	2	1	1	2	1	1	0	2	1	3	3	2	2	3	3	1	0	0	5	41.3	35.2	19.757	0	0.253381
BIRC2;BIRC3	Baculoviral IAP repeat-containing protein 2;Baculoviral IAP repeat-containing protein 3	A0A087X2B2;Q13490-2;E9PMH5;Q13490;E9PIW1;Q13489;E9PQZ9;E9PI77;H0YDY3	A0A087X2B2;Q13490-2;E9PMH5;Q13490;E9PIW1;Q13489	NaN	1.03705	0.926398	1.4219	NaN	1.06343	NaN	NaN	NaN	NaN	NaN	NaN	NaN	NaN	NaN	NaN	NaN	NaN	4.6055e-10	66950000	53090000	13861000	1	3	2	2	1	3	1	1	1	0	0	0	0	0	0	0	0	0	4	6.7	6.7	60.423	0	0.260942
SRSF3	Serine/arginine-rich splicing factor 3	A0A087X2D0;P84103-2;P84103	A0A087X2D0;P84103-2;P84103	0.295803	NaN	NaN	NaN	NaN	NaN	NaN	NaN	NaN	-0.884492	NaN	-0.595436	-0.302983	NaN	-0.719728	-0.0549926	NaN	NaN	3.8134e-13	283650000	154530000	129120000	2	1	0	1	1	0	1	0	1	2	1	2	2	1	2	2	1	1	1	24.2	24.2	10.32	0	NaN
DDX1	ATP-dependent RNA helicase DDX1	Q92499-3;Q92499-2;F1T0B3;A0A087X2G1;Q92499	Q92499-3;Q92499-2;F1T0B3;A0A087X2G1;Q92499	NaN	NaN	NaN	NaN	NaN	NaN	NaN	NaN	NaN	0.115316	0.0877415	0.116317	0.259793	NaN	0.0467484	NaN	NaN	NaN	1.3616e-35	137950000	89227000	48726000	1	0	0	1	0	0	0	1	1	3	2	4	3	3	3	0	0	0	6	9.2	9.2	68.712	NaN	NaN
RTFDC1	Protein RTF2 homolog	A2A2L5;Q9BY42;A0A0A0MQR2;A2A2L6	A2A2L5;Q9BY42;A0A0A0MQR2;A2A2L6	NaN	NaN	NaN	NaN	NaN	NaN	NaN	NaN	NaN	0.0825137	0.057452	0.089243	0.175139	0.111259	0.221943	NaN	NaN	NaN	2.0902e-34	241760000	160640000	81120000	0	0	0	0	0	0	0	0	0	3	2	3	4	2	3	0	0	0	4	19.5	19.5	31.151	NaN	NaN
SNX6	Sorting nexin-6;Sorting nexin-6, N-terminally processed	Q9UNH7;A0A0A0MRI2;Q9UNH7-2;G3V5U2;H0YJF8;G3V4Z5;G3V5X9	Q9UNH7;A0A0A0MRI2;Q9UNH7-2	NaN	NaN	NaN	-0.403506	NaN	NaN	NaN	NaN	NaN	0.047408	NaN	0.0990192	0.281586	0.300964	0.108204	NaN	NaN	NaN	4.3306e-16	162950000	100640000	62312000	1	1	1	2	0	0	1	1	0	3	1	5	4	2	3	1	0	1	5	14	14	46.648	NaN	NaN
FAM213B	Prostamide/prostaglandin F synthase	J3QKK8;Q8TBF2-4;Q8TBF2-2;Q8TBF2-5;A0A0A0MRV4;J3KRV9;Q8TBF2;Q8TBF2-7;J3KPF6;Q8TBF2-3;Q8TBF2-6;Q8TBF2-8;J3KPF5;A0A0A0MT35	J3QKK8;Q8TBF2-4;Q8TBF2-2;Q8TBF2-5;A0A0A0MRV4;J3KRV9;Q8TBF2;Q8TBF2-7;J3KPF6;Q8TBF2-3;Q8TBF2-6;Q8TBF2-8;J3KPF5;A0A0A0MT35	NaN	NaN	NaN	0.789908	0.573713	0.75572	NaN	0.500841	0.436837	NaN	-1.39803	-1.58995	NaN	-2.85744	NaN	NaN	-0.505989	NaN	4.2949e-12	94982000	53467000	41516000	1	1	1	2	2	3	2	1	2	1	1	1	1	1	1	0	1	1	4	26.6	26.6	16.549	NaN	NaN
FHL2	Four and a half LIM domains protein 2	Q14192;J3KNW4;A0A0A0MSG2;C9J3S8;F8WDA8;U3KQT4;Q14192-2	Q14192;J3KNW4;A0A0A0MSG2	NaN	NaN	NaN	NaN	NaN	NaN	NaN	NaN	NaN	0.504687	0.696179	0.281469	1.14631	0.737731	0.797817	NaN	NaN	NaN	8.2064e-23	116380000	83556000	32822000	0	0	0	1	0	0	0	0	0	2	3	3	5	3	3	0	0	0	6	22.6	22.6	32.193	NaN	NaN
PLS3	Plastin-3	P13797-3;P13797-2;A0A0A0MSQ0;P13797;U3KQI3;Q5TBN3;P13796	P13797-3;P13797-2;A0A0A0MSQ0;P13797;U3KQI3	NaN	NaN	NaN	NaN	NaN	NaN	NaN	NaN	NaN	NaN	0.476857	0.461681	NaN	NaN	0.793043	NaN	NaN	NaN	9.0853e-23	129240000	84807000	44434000	0	0	1	1	1	1	0	0	0	1	3	3	1	1	2	0	0	0	3	6.3	6.3	65.632	NaN	NaN
ADD1	Alpha-adducin	A0A0A0MSR2;P35611-5;P35611-2;E7EV99;P35611-6;P35611-4;E7ENY0;P35611;P35611-3;D6RF25;D6RJE2;D6RAH3;H0Y9H2	A0A0A0MSR2;P35611-5;P35611-2;E7EV99;P35611-6;P35611-4;E7ENY0;P35611;P35611-3;D6RF25	NaN	NaN	NaN	NaN	NaN	NaN	NaN	NaN	NaN	NaN	NaN	NaN	0.536284	0.402671	NaN	NaN	NaN	NaN	1.1057e-10	43267000	26929000	16337000	0	0	0	0	0	0	1	0	0	1	0	1	2	3	1	0	0	0	3	10	10	43.99	NaN	NaN
IARS	Isoleucine--tRNA ligase, cytoplasmic	J3KR24;A0A0A0MSX9;P41252;Q5TCC6;Q5TCD1	J3KR24;A0A0A0MSX9;P41252	NaN	NaN	NaN	NaN	NaN	-0.321926	NaN	NaN	NaN	-0.301295	-2.4534	0.167267	0.253666	-1.01796	-0.260559	NaN	NaN	NaN	2.2512e-19	310370000	110520000	199850000	1	1	0	1	0	2	0	1	1	2	2	4	2	4	3	0	0	0	6	5.9	5.9	131.76	NaN	NaN
FDXR	NADPH:adrenodoxin oxidoreductase, mitochondrial	P22570-4;A0A0A0MTN9;P22570-6;P22570-5;A0A0A0MTR6;P22570;A0A0C4DFN8;P22570-7;A0A0A0MSZ4;P22570-3;A0A0A0MT64;J3QQX3;P22570-2;A0A0C4DGN7;J3QKZ8;J3QQW7	P22570-4;A0A0A0MTN9;P22570-6;P22570-5;A0A0A0MTR6;P22570;A0A0C4DFN8;P22570-7;A0A0A0MSZ4;P22570-3;A0A0A0MT64;J3QQX3;P22570-2;A0A0C4DGN7	0.664458	0.930474	1.06745	NaN	NaN	NaN	1.48984	NaN	NaN	NaN	NaN	-0.305937	0.709252	0.552022	NaN	NaN	NaN	NaN	8.0987e-13	115640000	83839000	31801000	2	2	2	1	1	1	2	1	1	1	1	3	2	3	0	0	0	0	5	12.1	12.1	48.056	0	NaN
ILK	Integrin-linked protein kinase	Q13418-2;Q13418;A0A0A0MTH3;Q13418-3;A0A087WWY6	Q13418-2;Q13418;A0A0A0MTH3;Q13418-3	NaN	NaN	NaN	NaN	NaN	NaN	NaN	NaN	-0.576485	0.502752	0.647554	0.191724	0.217376	0.347049	0.303295	NaN	NaN	NaN	1.3766e-26	350260000	232680000	117580000	0	0	1	1	0	0	1	0	2	4	4	5	4	4	3	0	0	1	6	19.7	19.7	44.349	NaN	NaN
ELOVL5	Elongation of very long chain fatty acids protein 5	A0A0A0MTI6;Q9NYP7;Q9NYP7-2;Q9NYP7-3	A0A0A0MTI6;Q9NYP7;Q9NYP7-2;Q9NYP7-3	NaN	NaN	NaN	NaN	NaN	NaN	NaN	NaN	NaN	NaN	NaN	NaN	-0.0673197	NaN	-0.494667	NaN	NaN	NaN	6.4411e-25	79346000	47758000	31588000	0	0	0	1	0	0	0	1	1	2	1	1	2	0	2	1	0	0	2	8.4	8.4	30.742	NaN	NaN
GPI	Glucose-6-phosphate isomerase	P06744;P06744-2;A0A0A0MTS2;K7EQ48;A0A0J9YXP8;A0A0J9YX90;A0A0J9YYH3;K7EPY4;K7EP41;K7ELR7;K7ENA0;K7ERK8;K7ERC6;CON__Q3ZBD7;K7EIL4	P06744;P06744-2;A0A0A0MTS2;K7EQ48;A0A0J9YXP8;A0A0J9YX90;A0A0J9YYH3;K7EPY4	0.0603498	-0.0160023	-0.214884	0.0617974	-0.0541685	0.0961094	0.0869766	0.264617	-0.0899582	-0.117278	0.0358837	0.0795877	-0.129012	-0.0195738	0.0767583	0.0877778	0.0969409	0.264072	1.0735e-67	1151300000	740650000	410700000	4	5	4	5	3	4	5	3	4	8	5	8	8	6	5	3	3	4	9	18.8	18.8	63.146	0	0.0777997
IREB2	Iron-responsive element-binding protein 2	P48200;A0A0A6YY96;H0YNL8;P48200-2;H0YN46	P48200;A0A0A6YY96	-1.39675	-1.7655	-1.31831	-2.11177	-1.45311	-1.6579	-2.21323	-1.56217	-1.48188	-0.604239	-0.460211	-0.952039	-0.937625	-0.868946	-0.74755	-0.687817	NaN	-1.57731	3.8824e-91	975950000	477850000	498100000	5	5	3	3	2	2	3	2	5	10	7	6	5	8	6	3	0	3	15	20.5	20.5	105.04	0	-0.261152
C15orf38;C15orf38-AP3S2	UPF0552 protein C15orf38	Q7Z6K5;Q7Z6K5-2;A0A0A6YYH1;H0YMP5;H0YL85;H0YL03;H0YMK0	Q7Z6K5;Q7Z6K5-2;A0A0A6YYH1;H0YMP5;H0YL85	NaN	-0.00667624	-0.671215	-0.0664948	NaN	NaN	NaN	NaN	-0.167563	-0.486285	-0.416865	NaN	NaN	-0.922964	-0.844587	NaN	NaN	NaN	8.4381e-15	383320000	216740000	166580000	1	2	2	2	1	1	1	1	2	2	2	1	1	2	2	1	1	1	3	14.2	14.2	24.943	0	0.272451
		A0A0B4J220;E9PLD3;E9PRG8	A0A0B4J220	-0.540014	-0.517882	-0.578723	-0.291683	-0.25797	-0.351976	-0.227981	-0.226867	-0.399053	-0.843674	-0.83655	-0.740469	-0.803188	-0.896987	-0.761504	-0.135563	-0.156046	-0.0651922	2.8755e-102	4838600000	2673200000	2165300000	7	5	5	6	4	6	6	3	6	3	5	3	3	4	2	3	3	5	8	48.8	48.8	14.234	0	0.248331
TUBB3	Tubulin beta-3 chain	Q13509;A0A0B4J269;Q13509-2;G3V2A3;G3V5W4;G3V2R8;G3V3R4;G3V2N6	Q13509;A0A0B4J269;Q13509-2	NaN	NaN	NaN	NaN	NaN	NaN	NaN	NaN	NaN	NaN	NaN	-0.349758	-0.422204	-0.0721045	-0.110902	NaN	NaN	NaN	0	153310000	86985000	66321000	0	0	1	0	0	0	1	0	1	2	2	2	2	2	2	0	0	0	1	32.4	7.3	50.432	NaN	NaN
PWP2	Periodic tryptophan protein 2 homolog	Q15269;A0A0B4J2E5	Q15269;A0A0B4J2E5	-0.714477	-0.534003	-0.996781	-0.61791	-0.932867	-0.691471	-0.460738	-0.532601	-0.98848	NaN	-1.47212	NaN	NaN	-2.06066	-1.04169	NaN	NaN	NaN	2.1713e-13	157690000	71514000	86174000	2	3	2	3	3	2	2	2	2	1	2	1	2	2	3	1	1	0	7	9	9	102.45	0	0.0230061
RPSA	40S ribosomal protein SA	C9J9K3;P08865;A0A0C4DG17;F8WD59	C9J9K3;P08865;A0A0C4DG17;F8WD59	NaN	NaN	NaN	NaN	NaN	NaN	NaN	NaN	NaN	0.0596561	-0.0138625	-0.0998616	0.309252	NaN	NaN	NaN	NaN	NaN	1.2283e-22	351130000	274000000	77137000	0	0	0	0	0	0	0	0	0	2	2	4	2	1	2	0	0	0	4	15.6	15.6	29.404	NaN	NaN
DDX46	Probable ATP-dependent RNA helicase DDX46	Q7L014;A0A0C4DG89;D6RJA6;H0Y9U3	Q7L014;A0A0C4DG89	-0.737453	-0.548419	-1.22223	-0.812725	-1.40944	-1.00932	-0.542663	NaN	-0.902313	-0.311166	-0.315372	-0.384735	-0.299299	-0.398658	-0.416677	-0.462556	-0.409321	-0.0947921	3.8372e-164	2749600000	1446700000	1302900000	4	4	4	5	4	3	5	1	3	21	15	15	29	17	16	14	15	16	34	33.4	33.4	117.36	0	-0.271871
CAPNS1	Calpain small subunit 1	P04632;A0A0C4DGQ5;U3KQE2;K7EIV0;A0A075B7C0;K7EKD8;K7ELJ7;U3KPR7;K7EM73;Q96L46;K7ES78;K7EMQ1	P04632;A0A0C4DGQ5;U3KQE2;K7EIV0;A0A075B7C0;K7EKD8;K7ELJ7;U3KPR7;K7EM73	NaN	NaN	NaN	NaN	NaN	NaN	NaN	0.0178514	NaN	0.0464421	0.0249728	0.0052916	-0.132	-0.0920017	0.254074	NaN	NaN	NaN	5.4792e-53	526090000	339720000	186380000	0	1	0	1	0	1	0	2	1	5	5	6	5	5	5	1	0	1	6	22.8	22.8	28.315	NaN	NaN
DDX3X;DDX3Y	ATP-dependent RNA helicase DDX3X;ATP-dependent RNA helicase DDX3Y	A0A0D9SFB3;O00571-2;A0A0D9SG12;O00571;A0A0D9SF53;O15523-2;O15523;A0A0J9YVQ7;A0A087WVZ1;C9J081;O15523-3;A0A087WX09;B4DLA0;A0A0J9YYH6;C9J8G5;H0Y960	A0A0D9SFB3;O00571-2;A0A0D9SG12;O00571;A0A0D9SF53;O15523-2;O15523	0.00729615	-0.134537	0.0710157	-0.363241	0.114565	-0.144137	0.0265728	0.0347479	0.155471	-0.184845	-0.176687	-0.490154	-0.0410371	-0.195868	-0.348821	0.257385	-0.311814	-0.134207	6.0732e-68	578540000	342190000	236360000	6	4	6	5	3	2	4	2	4	8	4	9	7	6	6	4	3	2	12	24.8	24.8	70.839	0	-0.151433
FHL1	Four and a half LIM domains protein 1	A0A0D9SFZ9;Q13642-3;Q5JXH8;Q5JXH7;Q5JXI3;Q5JXI2;Q5JXI8;Q13642-1;Q13642-5;Q13642-4;Q13642;A0A0D9SG53;A0A0D9SGB2;Q5JXI0;A0A0D9SFI6;A0A0D9SFB0;Q5JXH9	A0A0D9SFZ9;Q13642-3;Q5JXH8;Q5JXH7;Q5JXI3;Q5JXI2;Q5JXI8;Q13642-1;Q13642-5;Q13642-4;Q13642;A0A0D9SG53;A0A0D9SGB2;Q5JXI0;A0A0D9SFI6;A0A0D9SFB0;Q5JXH9	NaN	NaN	NaN	NaN	NaN	NaN	NaN	NaN	NaN	NaN	0.310113	0.484542	NaN	0.526316	0.475347	NaN	NaN	NaN	6.611e-11	79519000	55569000	23949000	1	1	1	0	0	0	0	0	0	1	2	2	1	2	2	0	0	0	3	21.7	21.7	19.897	NaN	NaN
HLA-A;HLA-C;HLA-B;HLA-H	HLA class I histocompatibility antigen, A-29 alpha chain;HLA class I histocompatibility antigen, A-74 alpha chain;HLA class I histocompatibility antigen, A-66 alpha chain;HLA class I histocompatibility antigen, A-43 alpha chain;HLA class I histocompatibility antigen, A-36 alpha chain;HLA class I histocompatibility antigen, A-34 alpha chain;HLA class I histocompatibility antigen, A-26 alpha chain;…	Q5SRN7;A0A0G2JI36;Q9GJ45;A0A0G2JNY4;P30512;P30459;P30457;P30456;P30455;P30453;P30450;P30447;P30443;P18462;P16190;P16189;P16188;P13746;P10316;P10314;P05534;P04439;P01892;P01891;B0UXQ0;Q5SRN5;P13746-2;A0A0G2JIF2;A0A0G2JPD3;A0A0G2JL56;A0A087WWL9;Q29960-2;Q95365;Q31610;Q29940;Q29836;Q29718;Q04826;P30685;P30498;P30495;P30493;P30492;P30491;P30490;P30488;P30487;P30486;P30485;P30484;P30483;P30481;P30480;…	Q5SRN7;A0A0G2JI36;Q9GJ45;A0A0G2JNY4;P30512;P30459;P30457;P30456;P30455;P30453;P30450;P30447;P30443;P18462;P16190;P16189;P16188;P13746;P10316;P10314;P05534;P04439;P01892;P01891;B0UXQ0;Q5SRN5;P13746-2;A0A0G2JIF2;A0A0G2JPD3;A0A0G2JL56;A0A087WWL9;Q29960-2;Q95365;Q31610;Q29940;Q29836;Q29718;Q04826;P30685;P30498;P30495;P30493;P30492;P30491;P30490;P30488;P30487;P30486;P30485;P30484;P30483;P30481;P30480;…	NaN	NaN	NaN	NaN	NaN	NaN	NaN	NaN	NaN	NaN	0.428195	0.542329	NaN	0.380229	NaN	NaN	NaN	NaN	1.8625e-12	51543000	34859000	16684000	0	0	1	0	0	0	0	0	0	0	2	2	0	1	1	0	0	0	2	12	12	34.211	NaN	NaN
		P0DMV9;P0DMV8;A0A0G2JIW1;P0DMV8-2;V9GZ37	P0DMV9;P0DMV8;A0A0G2JIW1;P0DMV8-2	0.265143	NaN	0.404279	0.400364	0.381325	0.0447368	0.853017	NaN	0.25137	-0.184689	-0.0690343	-0.0596095	-0.116535	-0.101281	-0.25261	NaN	NaN	NaN	6.6512e-101	599520000	372520000	227000000	4	1	2	3	2	4	3	0	3	4	3	8	6	5	5	0	1	1	5	25.7	22.6	70.051	0	0.0466136
UBA6	Ubiquitin-like modifier-activating enzyme 6	A0AVT1;A0AVT1-2;H0Y8S8;A0AVT1-4;A0AVT1-3;H0Y9U5	A0AVT1;A0AVT1-2	0.261781	0.27502	0.32228	0.281388	0.384921	0.42292	0.165627	0.289705	0.236581	0.0522214	-0.220737	-0.169509	-0.415701	-0.312589	-0.286621	-0.0269531	-0.0291643	-0.0378979	2.2359e-115	2210600000	1350500000	860070000	18	10	12	18	10	8	15	9	16	12	11	16	13	14	13	7	8	7	23	25.2	25.2	117.97	0	0.109901
HCFC1	Host cell factor 1;HCF N-terminal chain 1;HCF N-terminal chain 2;HCF N-terminal chain 3;HCF N-terminal chain 4;HCF N-terminal chain 5;HCF N-terminal chain 6;HCF C-terminal chain 1;HCF C-terminal chain 2;HCF C-terminal chain 3;HCF C-terminal chain 4;HCF C-terminal chain 5;HCF C-terminal chain 6	P51610-2;P51610;P51610-4;A6NEM2	P51610-2;P51610;P51610-4;A6NEM2	NaN	NaN	0.591977	NaN	NaN	0.518494	NaN	NaN	NaN	0.464902	0.755634	NaN	0.957818	0.446557	NaN	NaN	NaN	NaN	8.806e-21	114230000	84364000	29869000	1	1	2	0	1	2	1	0	1	3	3	1	2	2	1	0	0	1	4	2.7	2.7	201.85	0	-0.073482
HN1L	Hematological and neurological expressed 1-like protein	H3BU16;Q9H910-2;A6NGP5;Q9H910;Q9H910-3;H3BMT0;H3BTV5;H3BMV3	H3BU16;Q9H910-2;A6NGP5;Q9H910;Q9H910-3;H3BMT0;H3BTV5;H3BMV3	NaN	NaN	NaN	NaN	NaN	NaN	NaN	NaN	NaN	NaN	NaN	0.4132	NaN	-0.7355	-0.258261	NaN	NaN	NaN	1.2517e-13	100010000	63068000	36942000	0	0	0	0	0	0	0	0	0	1	1	2	1	3	2	0	0	0	3	25.1	25.1	17.603	NaN	NaN
RARA	Retinoic acid receptor alpha	P10276-2;P10276;A8MUP8;P10276-3;J3KSJ4;D6RBI3;P10826-2;P10826;P10826-3;P13631-3;P13631-4;P13631-2;P13631	P10276-2;P10276;A8MUP8;P10276-3;J3KSJ4	-0.161394	-0.185827	-0.232766	-0.646884	-0.606899	-0.478166	-1.60125	-1.37818	-1.08545	-3.20962	NaN	-2.71869	NaN	-3.97765	-3.3999	-0.0932515	0.0115427	-0.181225	4.3518e-56	632680000	316960000	315720000	6	5	4	5	5	7	4	2	4	3	1	3	1	3	2	2	3	5	10	34.4	34.4	50.742	0	-0.421073
RPL23A	60S ribosomal protein L23a	P62750;H7BY10;K7EJV9;K7ERT8;A8MUS3;K7EMA7	P62750;H7BY10;K7EJV9;K7ERT8;A8MUS3;K7EMA7	NaN	NaN	NaN	NaN	NaN	NaN	NaN	NaN	NaN	-0.368237	-0.239142	-0.0974561	-0.326251	-0.355779	NaN	NaN	NaN	NaN	1.3355e-11	145550000	83336000	62215000	0	0	0	1	0	1	1	0	1	2	2	2	2	2	0	0	0	0	3	21.8	21.8	17.695	NaN	NaN
MATR3	Matrin-3	D6REM6;P43243;A8MXP9;D6R991;H0Y8T4;B3KM87;P43243-2;D6RB45;A0A0K0K1G4;D6R9F3;D6RBS2;D6RCM3;D6REK4;D6R8Z5;D6RAM9;D6RAY2;D6RBI2;D6RBK5;D6RE02;D6RIA2;Q68E03	D6REM6;P43243;A8MXP9;D6R991;H0Y8T4	-0.00477279	-0.0192579	-0.573423	0.191511	NaN	-0.272294	-0.633182	NaN	-0.488035	-0.939422	-1.05597	-1.1988	-0.863145	-0.770676	-1.05359	NaN	NaN	NaN	5.1731e-27	336150000	172720000	163440000	2	2	2	3	1	3	2	0	2	4	3	5	3	4	4	1	1	1	8	14.6	14.6	88.358	0	-0.0211335
EIF3L	Eukaryotic translation initiation factor 3 subunit L	Q9Y262-2;Q9Y262;B0QY89;B0QY90;H7C3A0;C9JHP4;C9K0Q7	Q9Y262-2;Q9Y262;B0QY89;B0QY90	NaN	NaN	NaN	NaN	NaN	NaN	NaN	NaN	NaN	-0.135614	-0.569603	-0.390264	-0.789017	NaN	-0.341512	NaN	NaN	NaN	4.5522e-16	114710000	69130000	45580000	0	0	0	0	0	0	1	0	1	2	2	4	2	1	3	0	0	0	5	10.5	10.5	61.013	NaN	NaN
EIF3D	Eukaryotic translation initiation factor 3 subunit D	B0QYA5;O15371-2;O15371-3;O15371;B0QYA4;B0QYA8;B0QYA6	B0QYA5;O15371-2;O15371-3;O15371;B0QYA4;B0QYA8;B0QYA6	NaN	NaN	NaN	NaN	NaN	NaN	NaN	NaN	NaN	-0.0533249	-0.0687804	0.0602518	NaN	NaN	-0.0175363	NaN	NaN	NaN	7.3004e-09	115410000	74869000	40540000	0	0	0	0	0	0	0	0	0	2	2	2	0	1	2	0	0	0	2	9.7	9.7	31.729	NaN	NaN
VIM	Vimentin	B0YJC4;P08670;B0YJC5;Q5JVS8;H7C5W5;F8W835;P41219;P41219-2	B0YJC4;P08670;B0YJC5	NaN	NaN	NaN	NaN	NaN	NaN	NaN	NaN	NaN	-2.25581	-2.41735	-2.62128	-1.34243	-1.54907	NaN	NaN	1.48023	NaN	6.559e-50	156530000	60855000	95670000	0	1	0	0	0	0	0	0	0	4	3	3	5	4	3	0	2	0	8	20	18.3	49.653	NaN	NaN
H3F3B;H3F3A;H3F3C;HIST2H3A;HIST2H3PS2;HIST3H3;HIST1H3A	Histone H3;Histone H3.3C;Histone H3.2;Histone H3.1t;Histone H3.3;Histone H3.1	K7EMV3;K7EP01;B4DEB1;K7EK07;Q6NXT2;Q71DI3;Q5TEC6;Q16695;P84243;P68431;K7ES00	K7EMV3;K7EP01;B4DEB1;K7EK07;Q6NXT2;Q71DI3;Q5TEC6;Q16695;P84243;P68431;K7ES00	NaN	NaN	NaN	NaN	NaN	NaN	NaN	NaN	NaN	NaN	NaN	-0.632882	-0.185093	-0.133135	NaN	NaN	NaN	NaN	1.7872e-05	105400000	56090000	49307000	0	0	0	0	0	0	0	0	0	0	1	2	2	2	0	0	0	0	2	17.4	17.4	10.334	NaN	NaN
POLDIP2	Polymerase delta-interacting protein 2	B4DEM9;Q9Y2S7	B4DEM9;Q9Y2S7	NaN	-0.599717	NaN	0.120228	0.153544	0.276962	NaN	NaN	NaN	0.0463637	NaN	0.156294	-0.809625	-0.523374	-0.610629	0.00299732	0.373905	-0.152745	2.4613e-16	293980000	175490000	118490000	1	2	1	2	3	3	1	1	1	3	1	3	3	4	2	2	2	2	4	13.7	13.7	39.871	0	0.753261
CS	Citrate synthase;Citrate synthase, mitochondrial	B4DJV2;O75390;A0A0C4DGI3;H0YIC4;F8VPF9;F8VPA1;F8VTT8;F8W1S4;F8W4S1;H0YH82;F8W642;F8VZK9;F8VX07;F8VRP1;F8VX68;F8VWQ5;F8VRI6;F8VR34;F8W0J2;F8VP03;F8VU34;F8W031	B4DJV2;O75390;A0A0C4DGI3	-0.0849062	0.00785916	-0.132752	0.193156	0.0743452	-0.0226041	0.248114	0.215079	0.103436	0.0652243	-0.00121072	0.0222345	0.0471617	-0.099296	-0.022519	-0.0417405	0.133152	-0.0522393	5.6194e-49	2087400000	1217400000	870020000	5	5	7	7	4	7	6	7	7	8	8	8	8	7	8	3	2	3	10	21.9	21.9	50.431	0	0.159251
SEC61A1	Protein transport protein Sec61 subunit alpha isoform 1	P61619;B4DR61;P61619-3;H7C1Q9;C9JXC6;H7C069;A6NK38;F2Z2C7;A6NIF9;C9JJV4;F8W776;Q8TC24;Q9H9S3-2;Q9H9S3-3;Q9H9S3	P61619;B4DR61;P61619-3	NaN	-0.339743	-0.00672101	NaN	NaN	NaN	0.228087	NaN	NaN	-0.14314	0.0336007	0.156236	-0.107947	-0.11086	-0.123656	NaN	NaN	NaN	3.5355e-11	231780000	144280000	87491000	1	2	2	1	1	1	2	1	2	2	2	3	2	2	2	1	0	0	3	6.3	6.3	52.264	0	NaN
FXR1	Fragile X mental retardation syndrome-related protein 1	P51114-2;B4DXZ6;P51114;E7EU85;E9PFF5;P51114-3;H7C4S4;C9JZE0;C9JY20;C9JAJ4	P51114-2;B4DXZ6;P51114;E7EU85;E9PFF5;P51114-3	NaN	-0.473165	-0.298329	-0.604869	-0.522406	-0.401278	-0.734751	-0.4582	-0.307096	-0.181328	-0.375635	-0.191526	0.407537	-0.113545	-0.0337512	-0.000748342	NaN	NaN	7.4396e-17	445980000	259740000	186230000	0	2	2	2	3	2	3	2	2	3	5	5	5	4	4	2	0	0	4	11.1	11.1	60.791	0	-0.136659
DERL1	Derlin-1	B4E1G1;Q9BUN8;Q9BUN8-2;E5RGY0	B4E1G1;Q9BUN8;Q9BUN8-2;E5RGY0	NaN	NaN	-0.402173	NaN	NaN	0.2173	-0.00122461	8.62889e-05	NaN	0.148265	0.439879	0.114766	NaN	0.321127	0.360082	-0.230812	-0.104511	-0.234684	1.6899e-15	224140000	145830000	78309000	1	1	2	1	1	2	3	2	0	2	2	3	1	3	2	3	2	2	5	27.8	27.8	17.033	0	0.619473
PES1	Pescadillo homolog	B5MCF9;O00541-2;O00541;B3KXD6	B5MCF9;O00541-2;O00541	0.726387	NaN	NaN	0.451583	0.324619	0.2743	0.574777	NaN	0.794994	NaN	NaN	NaN	0.638548	-0.629916	0.528459	NaN	NaN	NaN	8.0306e-20	174760000	111410000	63351000	2	1	1	2	2	4	3	1	2	1	0	0	3	2	2	1	1	0	6	10.9	10.9	66.077	0	-0.401768
RAN	GTP-binding nuclear protein Ran	P62826;B5MDF5;J3KQE5;F5H018;H0YFC6;B4DV51;A0A087X0W0	P62826;B5MDF5;J3KQE5;F5H018	-0.273537	0.121139	-0.323556	-0.292985	-0.12679	-0.107165	-0.00543052	-0.134958	-0.234951	-0.176841	0.0292434	-0.0534297	0.00772631	-0.0632696	0.00958051	-0.129049	-0.0883511	-0.0839846	7.9261e-55	1380000000	865900000	514060000	5	4	4	3	4	5	4	4	4	5	4	5	5	3	5	2	2	3	7	36.1	36.1	24.423	0	0.146747
SEPT10	Septin-10	E7EW69;Q9P0V9;E7EX04;Q9P0V9-2;B5ME97;Q9P0V9-3;F5GYV2;C9JEW2;C9JNR7;F5H1F2	E7EW69;Q9P0V9;E7EX04;Q9P0V9-2;B5ME97;Q9P0V9-3	NaN	NaN	NaN	NaN	NaN	NaN	NaN	NaN	NaN	-0.170882	0.272143	-0.40602	-0.214624	-0.450266	-0.0434345	NaN	NaN	NaN	3.1129e-15	190560000	121860000	68700000	1	0	0	1	1	1	1	1	1	2	2	4	3	4	4	1	0	0	4	10.7	10.7	52.145	NaN	NaN
MYL6	Myosin light polypeptide 6	F8W1R7;P60660-2;P60660;J3KND3;G8JLA2;G3V1V0;B7Z6Z4;F8VPF3;G3V1Y7;F8VZU9;F8W1I5;F8W180;P14649	F8W1R7;P60660-2;P60660;J3KND3;G8JLA2;G3V1V0;B7Z6Z4;F8VPF3;G3V1Y7	-0.4879	-0.322132	-0.472627	-0.287898	-0.273317	-0.183857	-0.313321	-0.297166	-0.28809	0.321485	0.358085	0.0131473	0.413726	0.242801	0.3249	NaN	NaN	0.322421	1.3439e-37	599530000	392810000	206710000	4	3	3	4	3	3	2	2	2	3	3	4	4	4	4	1	0	3	5	43.4	43.4	16.29	0	0.199311
NAP1L1;NAP1L4	Nucleosome assembly protein 1-like 1;Nucleosome assembly protein 1-like 4	H0YH88;H0YHC3;F8W020;F8W118;F8VXI6;F8VUX1;F8VY35;P55209-3;F8VV59;F8W543;B7Z9C2;P55209-2;F8W0J6;F5H4R6;H0YIV4;P55209;E9PNW0;F8VRJ2;E9PJJ2;E9PS34;E9PNJ7;A8MXH2;F8VVB5;E9PKT8;C9J6D1;C9JZI7;Q99733;Q99733-2	H0YH88;H0YHC3;F8W020;F8W118;F8VXI6;F8VUX1;F8VY35;P55209-3;F8VV59;F8W543;B7Z9C2;P55209-2;F8W0J6;F5H4R6;H0YIV4;P55209;E9PNW0;F8VRJ2;E9PJJ2;E9PS34;E9PNJ7;A8MXH2;F8VVB5;E9PKT8;C9J6D1;C9JZI7;Q99733;Q99733-2	NaN	NaN	NaN	NaN	NaN	NaN	NaN	NaN	NaN	0.0288292	NaN	0.118264	0.0897738	NaN	NaN	NaN	NaN	NaN	5.827e-08	194360000	123590000	70774000	1	1	1	0	0	0	0	1	0	2	1	2	2	1	1	1	0	1	2	11.9	11.9	20.966	NaN	NaN
POLR2B	DNA-directed RNA polymerase;DNA-directed RNA polymerase II subunit RPB2	C9J2Y9;P30876;C9J4M6	C9J2Y9;P30876;C9J4M6	0.499841	0.510883	0.564138	0.199725	0.282416	0.25976	-0.261963	-0.344835	-0.0590687	-0.742599	-0.769209	-0.810414	-0.828699	-0.751004	-0.87232	0.198518	0.0940022	0.056201	4.4349e-201	4133700000	2241400000	1892300000	26	23	22	27	22	25	24	14	21	17	12	15	15	14	14	19	11	14	35	34.4	34.4	133.06	0	-0.251123
RASA4B;RASA4	Ras GTPase-activating protein 4;Putative Ras GTPase-activating protein 4B	F8W6L0;E7ERK1;O43374-2;F5GXT2;O43374;C9J798;H0YB35;H0YBU2;E5RK78	F8W6L0;E7ERK1;O43374-2;F5GXT2;O43374;C9J798;H0YB35	NaN	NaN	NaN	NaN	NaN	NaN	NaN	NaN	NaN	0.767635	NaN	NaN	0.0740225	0.713507	NaN	NaN	NaN	NaN	1.2006e-10	270340000	214910000	55428000	0	0	0	0	0	0	0	0	0	2	0	0	3	4	1	1	0	0	4	6.4	6.4	82.211	NaN	NaN
TNPO3	Transportin-3	E9PFH4;Q9Y5L0-3;Q9Y5L0;Q9Y5L0-1;C9J7E5;Q9Y5L0-5	E9PFH4;Q9Y5L0-3;Q9Y5L0;Q9Y5L0-1;C9J7E5;Q9Y5L0-5	0.415058	0.29816	0.194457	0.017901	-0.0222353	0.130789	-0.0368774	0.184955	0.376277	-0.451188	-0.706016	-0.609983	-1.32853	-1.4881	-1.07145	-0.202319	-0.299505	NaN	4.7015e-27	410140000	222730000	187420000	3	5	6	6	6	5	5	4	4	4	4	6	3	5	2	2	2	0	10	14.7	14.7	96.669	0	-0.280259
PELP1	Proline-, glutamic acid- and leucine-rich protein 1	E7EV54;Q8IZL8;C9JFV4;I3L445	E7EV54;Q8IZL8;C9JFV4	NaN	0.430707	0.187675	0.487753	0.18819	-0.156099	0.590862	0.391225	0.228296	-0.213004	-0.533674	-0.21393	-0.735383	-0.362395	NaN	NaN	NaN	NaN	8.4927e-26	228210000	137860000	90353000	0	2	2	3	3	3	2	3	3	2	3	2	3	4	1	0	1	1	5	7.8	7.8	96.906	0	-0.121001
GNB2;GNB4	Guanine nucleotide-binding protein G(I)/G(S)/G(T) subunit beta-2;Guanine nucleotide-binding protein subunit beta-4	C9JIS1;C9JXA5;E7EP32;P62879;C9JZN1;Q9HAV0;P62879-2;H7C5J5	C9JIS1;C9JXA5;E7EP32;P62879;C9JZN1;Q9HAV0	NaN	NaN	NaN	NaN	NaN	0.182206	NaN	NaN	NaN	NaN	0.184246	0.0692866	0.276223	0.373088	-0.120569	NaN	NaN	NaN	3.0749e-19	260720000	168950000	91770000	1	1	1	1	1	2	1	1	1	1	3	3	3	2	3	0	0	0	2	24.6	24.6	25.538	NaN	NaN
RPL24	60S ribosomal protein L24	C9JXB8;C9JNW5;P83731	C9JXB8;C9JNW5;P83731	NaN	-0.766019	-0.621109	-0.599093	-0.431613	-0.486611	-0.177708	NaN	NaN	NaN	NaN	NaN	NaN	NaN	NaN	NaN	NaN	NaN	2.6341e-06	217040000	125180000	91866000	1	2	2	2	2	2	2	0	1	1	1	1	1	1	1	1	1	0	2	13.2	13.2	14.369	0	0.206953
CHCHD3	Coiled-coil-helix-coiled-coil-helix domain-containing protein 3, mitochondrial	Q9NX63;C9JRZ6;F8WAR4;F8WD73	Q9NX63;C9JRZ6;F8WAR4	NaN	NaN	NaN	NaN	NaN	0.247759	NaN	NaN	NaN	0.422523	NaN	0.179856	0.0881125	-0.694209	NaN	NaN	NaN	NaN	7.5616e-12	151510000	84802000	66707000	1	0	1	1	0	2	0	0	0	2	2	3	3	2	1	1	1	1	4	14.5	14.5	26.152	NaN	NaN
RRM2	Ribonucleoside-diphosphate reductase subunit M2	C9JXC1;P31350;P31350-2;Q7LG56-3	C9JXC1;P31350;P31350-2	NaN	NaN	NaN	NaN	0.342692	0.206989	NaN	NaN	NaN	0.759997	NaN	NaN	NaN	NaN	NaN	NaN	NaN	NaN	1.7265e-21	67698000	45859000	21839000	0	0	0	1	2	2	1	0	1	2	0	1	1	1	1	0	0	0	2	11.4	11.4	33.789	NaN	NaN
PCYOX1	Prenylcysteine oxidase 1	C9K055;F8W8W4;Q9UHG3-2;Q9UHG3;C9JGT6;C9JM55	C9K055;F8W8W4;Q9UHG3-2;Q9UHG3;C9JGT6;C9JM55	NaN	NaN	NaN	NaN	NaN	NaN	NaN	NaN	NaN	0.200392	NaN	0.261495	0.671025	0.25156	0.425435	NaN	NaN	NaN	1.2378e-09	99001000	66147000	32854000	0	0	0	0	0	0	0	0	0	2	1	2	2	2	2	0	0	0	2	11.5	11.5	23.429	NaN	NaN
RPL32	60S ribosomal protein L32	D3YTB1;P62910;F8W727;D3YTI8	D3YTB1;P62910;F8W727	-0.451398	-0.498377	-0.522702	-0.252792	-0.317119	-0.405641	-0.178769	-0.219131	-0.308069	-0.277974	-0.238218	-0.127897	-0.381724	-0.350695	-0.352886	0.0737415	0.0441847	0.124547	0	107840000000	64033000000	43802000000	13	15	14	14	14	14	12	12	12	10	11	12	11	12	10	14	10	13	17	71.4	71.4	15.616	0	0.181258
HNRNPD	Heterogeneous nuclear ribonucleoprotein D0	H0YA96;D6RAF8;H0Y8G5;Q14103-4;Q14103-3;Q14103-2;Q14103;D6RF44;D6RBQ9;D6RD83;O14979-3;O14979-2;A0A087WUK2;O14979	H0YA96;D6RAF8;H0Y8G5;Q14103-4;Q14103-3;Q14103-2;Q14103;D6RF44;D6RBQ9	0.102131	NaN	NaN	NaN	NaN	NaN	NaN	NaN	NaN	NaN	-0.266889	-0.42976	-1.18154	-0.0664934	-0.903722	NaN	NaN	NaN	3.009e-33	351700000	221050000	130650000	2	0	0	0	0	0	0	0	0	1	2	5	3	2	3	1	0	0	5	30	30	23.811	0	NaN
SEPT11	Septin-11	D6RGI3;Q9NVA2;D6RER5;Q9NVA2-2;D6RDU5;H0Y9G8;D6RDP1;D6R9Y6;H0Y961	D6RGI3;Q9NVA2;D6RER5;Q9NVA2-2;D6RDU5	NaN	NaN	NaN	NaN	NaN	NaN	NaN	NaN	0.454284	-0.323377	0.173141	-0.262869	-0.420971	-0.417633	-0.526619	NaN	NaN	NaN	1.0462e-14	180320000	107220000	73093000	0	0	0	0	0	0	0	0	2	3	3	3	4	2	3	0	1	0	4	12.9	12.9	49.005	NaN	NaN
SEC31A	Protein transport protein Sec31A	O94979-6;O94979-3;O94979-10;O94979-4;O94979-9;O94979-2;O94979;O94979-8;D6REX3;O94979-5;D6RHZ5;H0Y9T9;O94979-7;H7BXG7;D6RE64;D6RCQ9;H0Y8W8	O94979-6;O94979-3;O94979-10;O94979-4;O94979-9;O94979-2;O94979;O94979-8;D6REX3;O94979-5;D6RHZ5;H0Y9T9	NaN	NaN	NaN	NaN	NaN	NaN	NaN	NaN	NaN	NaN	-0.251526	-0.389053	0.0340071	-0.173324	-0.30082	NaN	NaN	NaN	1.935e-17	100270000	57927000	42339000	0	0	0	1	0	0	1	1	1	1	4	2	3	3	3	0	0	0	5	6.2	6.2	117.67	NaN	NaN
PYCR1	Pyrroline-5-carboxylate reductase;Pyrroline-5-carboxylate reductase 1, mitochondrial	J3QKT4;J3KQ22;E2QRB3;P32322-2;P32322;P32322-3;J3QR88;J3QLK9;J3QL23;J3QL32;J3QL24;J3KSA9	J3QKT4;J3KQ22;E2QRB3;P32322-2;P32322;P32322-3;J3QR88;J3QLK9;J3QL23;J3QL32;J3QL24	NaN	NaN	NaN	NaN	NaN	NaN	NaN	NaN	NaN	-0.205769	NaN	NaN	-0.338702	-0.257375	-0.443806	NaN	NaN	NaN	1.437e-13	78791000	50369000	28422000	0	0	0	0	0	0	1	0	1	2	1	1	2	3	2	0	0	0	3	16.9	16.9	25.626	NaN	NaN
RPL30	60S ribosomal protein L30	E5RI99;P62888;A0A0B4J213;A0A0C4DH44	E5RI99;P62888;A0A0B4J213	NaN	NaN	NaN	NaN	NaN	NaN	NaN	NaN	NaN	NaN	NaN	-0.442951	NaN	-0.413904	-0.38334	NaN	NaN	NaN	2.71e-13	101980000	59119000	42857000	0	0	0	0	0	1	1	0	1	0	1	2	0	2	2	0	0	0	3	41.2	41.2	12.656	NaN	NaN
CCT5	T-complex protein 1 subunit epsilon	E7ENZ3;P48643;P48643-2;B7ZAR1;E9PCA1;D6RIZ7;H0Y914	E7ENZ3;P48643;P48643-2;B7ZAR1;E9PCA1	-0.14309	0.0981342	-0.163371	0.291076	-0.0976786	0.100181	0.419487	0.147305	0.0352165	-0.101677	-0.137252	-0.00550538	-0.299276	0.0872764	-0.166709	-0.170772	NaN	-0.0649295	2.7765e-86	991830000	589230000	402600000	5	3	2	2	4	5	4	2	5	7	7	10	9	9	7	3	1	2	15	35.4	35.4	53.848	0	0.243271
NARF	Nuclear prelamin A recognition factor	Q9UHQ1-4;Q9UHQ1-3;Q9UHQ1;E7EP87;Q9UHQ1-2;A0A088AWN8;J3KT43;J3KTG5;J3KS48;E9PH27;J3QRB0;Q9H6Q4-3;Q9H6Q4;J3QL28;J3QSD9;J3KTP5;H3BSH2;J3KRH7;Q9H6Q4-2	Q9UHQ1-4;Q9UHQ1-3;Q9UHQ1;E7EP87;Q9UHQ1-2;A0A088AWN8;J3KT43	0.445835	0.421389	0.734793	0.267644	0.363581	0.151476	-0.354446	0.0620745	-0.100548	-1.14458	-1.09176	-1.19403	-1.11261	-1.13749	-1.18143	-0.137423	-0.221167	-0.331732	5.1923e-38	567170000	311930000	255230000	6	6	5	4	6	5	2	3	3	4	5	5	3	4	6	3	3	4	10	32	32	44.68	0	-0.178191
RPL14	60S ribosomal protein L14	E7EPB3;P50914	E7EPB3;P50914	NaN	NaN	NaN	NaN	NaN	-0.683244	-0.391562	NaN	NaN	0.0229885	NaN	NaN	-0.284737	-0.108427	0.0909717	NaN	NaN	NaN	1.391e-11	302850000	195240000	107610000	1	1	1	1	1	2	2	1	1	3	1	1	2	2	2	0	0	1	3	28.2	28.2	14.558	NaN	NaN
SEPT7	Septin-7	G3V1Q4;E7ES33;Q16181-2;Q16181;E7EPK1;H0Y3Y4;Q5JXL7;Q6ZU15	G3V1Q4;E7ES33;Q16181-2;Q16181;E7EPK1;H0Y3Y4	NaN	NaN	NaN	NaN	NaN	-0.271544	NaN	NaN	NaN	-0.292594	-0.0337354	0.0578664	-0.174112	NaN	NaN	NaN	NaN	NaN	1.3112e-12	138450000	82852000	55596000	0	0	1	0	0	2	0	1	0	2	2	3	2	1	1	1	1	0	4	11.2	11.2	44.842	NaN	NaN
EZR	Ezrin	P15311;E7EQR4	P15311;E7EQR4	-0.0696959	-0.196744	-0.13649	0.0734093	0.000482589	-0.257262	0.141578	-0.0030161	0.102995	-0.231827	0.0654148	0	-0.189415	-0.0735237	-0.105061	0.283919	NaN	NaN	9.0117e-108	1460300000	919830000	540430000	6	6	7	7	4	7	7	4	4	7	8	13	7	6	9	2	1	1	8	28	28	69.412	0	0.136972
RPL9	60S ribosomal protein L9	E7ESE0;H0Y9V9;P32969;D6RAN4;H0Y9R4	E7ESE0;H0Y9V9;P32969;D6RAN4	NaN	NaN	NaN	NaN	NaN	NaN	NaN	NaN	NaN	-0.261202	-0.0556011	-0.186573	-0.248359	-0.363899	-0.267871	NaN	NaN	NaN	9.5695e-16	158270000	93529000	64745000	0	0	1	0	0	0	0	0	0	2	2	3	3	2	2	0	1	0	3	19.3	19.3	18.9	NaN	NaN
DAGLB	Sn1-specific diacylglycerol lipase beta	Q8NCG7-2;Q8NCG7-4;E7ET49;Q8NCG7	Q8NCG7-2;Q8NCG7-4;E7ET49;Q8NCG7	-0.0604688	NaN	NaN	-0.211758	NaN	NaN	NaN	NaN	NaN	-0.220115	0.0118217	0.236818	0.703098	0.255877	-0.0327431	NaN	NaN	NaN	6.0552e-16	111760000	70944000	40812000	2	1	0	2	0	0	1	0	1	2	2	4	3	2	2	1	0	1	4	11.8	11.8	43.191	0	-0.151289
DNPEP	Aspartyl aminopeptidase	Q9ULA0;E7ETB3;E7EPX3;B9ZVU2;F8WAN0;C9JBE1;E7EMB6;E5RJ35;C9JRG3;C9J1E2	Q9ULA0;E7ETB3;E7EPX3;B9ZVU2;F8WAN0;C9JBE1;E7EMB6	NaN	NaN	NaN	NaN	NaN	NaN	NaN	NaN	NaN	NaN	NaN	NaN	0.300152	NaN	-0.424818	NaN	NaN	NaN	2.0838e-09	78513000	44403000	34110000	0	0	1	0	0	0	0	0	0	1	0	1	3	1	2	0	0	1	3	8	8	52.428	NaN	NaN
EIF4G1	Eukaryotic translation initiation factor 4 gamma 1	Q04637-6;Q04637-7;Q04637-5;E7EX73;Q04637-4;E9PGM1;Q04637-3;E7EUU4;Q04637;Q04637-8;Q04637-9;A0A0A0MR52;C9JF13;H7C044;C9J6B6;C9K073;C9J2Z7;O43432-4;O43432;O43432-3;A0A0A0MSA7;H7C0V6	Q04637-6;Q04637-7;Q04637-5;E7EX73;Q04637-4;E9PGM1;Q04637-3;E7EUU4;Q04637;Q04637-8;Q04637-9;A0A0A0MR52	-0.0669369	-0.209069	0.286509	0.154814	-0.018755	-0.0658626	-0.220885	-0.43265	-0.34384	0.299702	0.172431	0.192407	0.292372	0.211676	0.443487	-0.0796124	NaN	0.234964	2.8022e-99	1165900000	755440000	410430000	6	5	4	5	5	5	3	2	6	12	11	14	13	11	12	4	1	3	19	17.2	17.2	154.8	0	0.0481819
MAP4	Microtubule-associated protein;Microtubule-associated protein 4	E7EVA0;P27816-6;P27816;P27816-2;H7C4C5;P27816-5;P27816-4;B5MEG9;H0Y2V1;F8W9U4	E7EVA0;P27816-6;P27816;P27816-2	-0.0350756	-0.0940316	-0.24535	0.249284	-0.119979	NaN	0.135408	NaN	0.459527	0.714294	0.513183	0.497891	0.642499	0.826505	0.806674	0.0641682	-0.12063	0.0964075	4.0215e-102	1405000000	972580000	432430000	5	2	3	3	3	1	4	1	4	12	9	13	9	15	10	4	5	3	17	10.2	10.2	245.44	0	0.158684
KLC1	Kinesin light chain 1	G5E9S8;Q07866-8;G3V2E7;Q07866-2;Q07866-3;Q07866;F8W6L3;Q07866-7;G3V3H3;Q07866-5;Q07866-10;Q07866-6;G3V5R9;Q07866-4;Q07866-9;E7EVH7;H0YJU9;H0YJL0;H0YJT3;H0YG16;H0YGB8;G3V2P7;Q9NSK0-5;Q9NSK0;Q9NSK0-3	G5E9S8;Q07866-8;G3V2E7;Q07866-2;Q07866-3;Q07866;F8W6L3;Q07866-7;G3V3H3;Q07866-5;Q07866-10;Q07866-6;G3V5R9;Q07866-4;Q07866-9;E7EVH7	NaN	NaN	NaN	NaN	NaN	NaN	NaN	NaN	NaN	-0.478851	0.0715115	0.598583	0.39013	0.405671	0.58757	NaN	NaN	NaN	1.9468e-19	159130000	105200000	53930000	1	1	0	1	0	1	1	0	0	2	3	3	4	3	3	0	1	0	6	15.5	15.5	62.506	NaN	NaN
CYFIP2	Cytoplasmic FMR1-interacting protein 2	E7EVJ5;Q96F07-2;Q96F07;E7EW33;H7C229;H0YL50;A0A087WVE1;A0A087WTQ3;A0A087WWZ1;Q7L576-3;A0A087WV63;A0A0G2JRF5;A0A087WWY5;A0A087WZL7;A0A0G2JRX2;A0A087WU52;A0A0G2JRV9;A0A087WWL1	E7EVJ5;Q96F07-2;Q96F07;E7EW33;H7C229	NaN	NaN	NaN	NaN	NaN	NaN	NaN	NaN	NaN	0.190842	NaN	0.249382	NaN	NaN	NaN	NaN	NaN	NaN	9.9581e-33	39411000	25847000	13563000	0	0	0	0	0	0	0	0	0	2	1	2	1	1	1	0	0	0	2	5.5	2.1	142.58	NaN	NaN
SQLE	Squalene monooxygenase	E7EVQ6;Q14534;E5RJH9	E7EVQ6;Q14534	-0.953994	NaN	NaN	NaN	NaN	NaN	NaN	NaN	NaN	NaN	NaN	0.0623966	-0.184185	NaN	-0.167981	NaN	NaN	NaN	4.3982e-13	157900000	87941000	69960000	3	0	0	2	1	2	1	0	0	1	0	2	2	1	2	1	0	0	3	8.8	8.8	53.067	0	NaN
CALD1	Caldesmon	Q05682-5;Q05682-4;E7EX44;Q05682-3;Q05682-6;Q05682-2;Q05682;E9PGZ1;C9J813	Q05682-5;Q05682-4;E7EX44;Q05682-3;Q05682-6;Q05682-2;Q05682;E9PGZ1;C9J813	-0.428389	NaN	-0.358369	NaN	NaN	-0.434225	-0.445807	NaN	NaN	0.397275	0.395898	0.425658	0.808828	0.790538	0.299416	NaN	NaN	0.0386143	1.6562e-33	362260000	240950000	121300000	2	1	2	1	1	2	2	1	1	4	4	5	4	4	3	0	1	2	6	16.2	16.2	61.212	0	-0.0408455
DCTN1	Dynactin subunit 1	Q14203-5;Q14203-2;Q14203-3;Q14203-4;E7EX90;Q14203-6;Q14203;Q6AWB1;E7EWF7	Q14203-5;Q14203-2;Q14203-3;Q14203-4;E7EX90;Q14203-6;Q14203	0.0996162	NaN	0.179815	NaN	NaN	NaN	NaN	NaN	0.291228	0.285248	NaN	-0.166452	0.0678007	0.218092	0.630823	NaN	NaN	NaN	1.4672e-41	319060000	218800000	100260000	2	1	2	1	1	1	1	1	3	2	1	7	5	5	3	1	0	0	11	12.8	12.8	126.73	0	NaN
HNRNPH1	Heterogeneous nuclear ribonucleoprotein H;Heterogeneous nuclear ribonucleoprotein H, N-terminally processed	E9PCY7;P31943;G8JLB6;D6RIT2;D6RIU0;D6RBM0;D6RAM1;E5RGV0;D6R9T0;D6RFM3;D6RDU3;D6RJ04;D6RIH9;E7EQJ0;E7EN40;D6RDL0;E5RGH4;H0YB39;D6R9D3;D6RF17;H0YAQ2;H0YBG7;H0YBD7;E5RJ94;P31942-2;P31942	E9PCY7;P31943;G8JLB6;D6RIT2;D6RIU0;D6RBM0;D6RAM1;E5RGV0;D6R9T0;D6RFM3;D6RDU3;D6RJ04;D6RIH9;E7EQJ0	0.0262734	0.0988397	-0.156382	-0.0698543	-0.0437719	-0.263224	-0.297062	-0.0553134	0.0814134	-0.719994	-0.548093	-0.740842	-0.547481	-0.554516	-0.621158	-0.0240398	0.0403786	-0.0132355	6.4669e-191	3573700000	2259300000	1314400000	8	5	5	8	7	7	8	5	6	8	9	9	7	7	7	6	4	5	6	33.6	27.3	47.087	0	-0.0961276
MYO1B	Unconventional myosin-Ib	O43795-2;E9PDF6;O43795;H7C2Y7	O43795-2;E9PDF6;O43795;H7C2Y7	NaN	NaN	NaN	NaN	NaN	NaN	NaN	NaN	NaN	NaN	NaN	-0.267719	-0.135734	-0.110271	NaN	NaN	NaN	NaN	2.2834e-05	37401000	21675000	15726000	0	0	0	0	0	1	0	1	1	1	1	2	1	1	1	0	0	0	2	2.1	2.1	124.95	NaN	NaN
SRP9	Signal recognition particle 9 kDa protein	E9PE20;P49458-2;P49458	E9PE20;P49458-2;P49458	NaN	0.213085	NaN	NaN	0.848816	0.317111	NaN	NaN	NaN	-1.36408	NaN	-1.19392	NaN	NaN	NaN	NaN	NaN	NaN	1.2144e-13	284200000	148460000	135750000	1	2	2	0	2	2	1	0	1	2	1	2	1	1	1	1	0	1	2	28.8	28.8	7.6677	0	0.369879
FUBP1	Far upstream element-binding protein 1	Q96AE4;Q96AE4-2;E9PEB5;C9JSZ1	Q96AE4;Q96AE4-2;E9PEB5	-0.487943	NaN	-0.373221	NaN	0.3733	NaN	0.229688	0.485179	-0.0377586	-0.0263079	0.210242	0.0323369	-0.0403781	0.0564244	-0.176409	0.136378	0.0431659	0.351963	1.0269e-60	810600000	501500000	309100000	2	1	2	1	2	1	3	3	3	6	6	6	6	6	5	3	3	2	7	13.5	12.4	67.56	0	0.803882
NUP155	Nuclear pore complex protein Nup155	E9PF10;O75694-2;O75694	E9PF10;O75694-2;O75694	0.222631	0.463643	0.562283	0.212835	0.16432	0.0966903	0.0207076	0.0380802	0	0.0984157	0.0484553	-0.259874	0.352206	0.187678	0.346531	0.458694	-0.331724	0.274036	1.1068e-116	499420000	320810000	178610000	9	4	4	4	6	5	7	3	6	5	4	7	6	3	6	2	2	2	15	13.3	13.3	148.09	0	-0.299323
TSN	Translin	H7C1D4;E9PGT1;Q15631;A0A0J9YVW2;Q15631-2	H7C1D4;E9PGT1;Q15631;A0A0J9YVW2;Q15631-2	NaN	NaN	NaN	NaN	NaN	NaN	NaN	NaN	NaN	-0.155082	-0.289423	0.105051	NaN	-0.157179	-0.671152	NaN	NaN	NaN	9.361e-16	205510000	112790000	92724000	0	1	1	1	1	1	0	0	1	2	3	2	0	2	2	1	0	0	4	21.1	21.1	21.01	NaN	NaN
RPS6KA1	Ribosomal protein S6 kinase alpha-1;Ribosomal protein S6 kinase	Q15418-4;E9PGT3;Q15418;Q15418-2;Q15418-3;E9PAN7;B7Z3B5;Q15349;Q15349-3;Q15349-2;F2Z2J1;Q5SVM6;E9PMM7;D6RHW7;Q5SVM7;D6R910;D6RA62;D6RE03;V9GXZ1;E7ERL6;O60307;Q9Y2H9;Q6P0Q8-2;Q6P0Q8;O15021-2;O15021-3;O15021-1;E7EWQ5;J3QT34;O15021	Q15418-4;E9PGT3;Q15418;Q15418-2;Q15418-3	0.0708659	0.054893	0.247017	0.0686562	0.0559663	0.108553	0.0118234	-0.0368767	0.0961942	-0.637987	-0.589848	-0.549544	-1.40062	-1.36966	-1.21441	-0.093953	-0.2088	-0.149796	1.5033e-115	3547800000	1994900000	1552900000	19	16	17	19	17	22	17	12	16	16	13	15	14	10	14	12	5	13	17	39.8	39.8	81.146	0	-0.00220975
NCAPH	Condensin complex subunit 2	E9PHA2;Q15003;Q15003-2;C9J470;C9JZP1;H7C415	E9PHA2;Q15003;Q15003-2;C9J470	0.843515	0.806259	0.909446	0.349492	0.252639	0.427471	0.467526	0.448775	0.797392	0.379972	0.299221	0.33255	-0.10071	0.155459	0.0489906	0.375742	0.114049	0.304998	6.0836e-92	1596900000	1090500000	506340000	10	7	6	8	7	8	6	7	7	3	5	5	7	4	5	7	8	8	12	24.1	24.1	81.572	0	-0.494023
EEF1D	Elongation factor 1-delta	E9PK01;P29692;A0A087X1X7;P29692-2;E9PRY8;E9PPR1;E9PL12;E9PQ49;E9PI39;E9PQZ1;P29692-4;E9PMW7;E9PIZ1;E9PK06;H0YCK7;E9PQC9;E9PKK3;E9PK72;H0YE58;H0YE72;E9PNW6;E9PJD0	E9PK01;P29692;A0A087X1X7;P29692-2;E9PRY8;E9PPR1;E9PL12;E9PQ49;E9PI39;E9PQZ1;P29692-4;E9PMW7	-0.414337	-0.148721	-0.280011	-0.374985	-0.282143	-0.226278	-0.0509498	-0.00181035	-0.0458651	-0.196139	-0.0334277	-0.0282385	-0.226763	-0.0804415	-0.223227	0.07138	-0.0415359	0.226793	1.6922e-238	1025800000	621470000	404300000	4	3	5	4	4	4	4	2	3	4	4	7	3	4	4	2	2	3	1	36	36	28.821	0	-0.00213274
BCLAF1	Bcl-2-associated transcription factor 1	E9PK09;E9PQN2;E9PKI6;Q9NYF8-3;E9PK91;Q9NYF8-2;Q9NYF8;E9PJA7;Q9NYF8-4;H0YF00	E9PK09;E9PQN2;E9PKI6;Q9NYF8-3;E9PK91;Q9NYF8-2;Q9NYF8;E9PJA7;Q9NYF8-4	-1.09235	-1.21592	-1.50218	-1.35112	NaN	-0.891391	-0.915173	-1.02033	-1.06326	-0.930698	-0.964216	-1.37104	-1.15941	-1.13548	-0.90075	NaN	-0.885276	NaN	4.1687e-16	380810000	176800000	204010000	3	2	2	2	1	3	2	2	3	4	4	3	4	3	3	1	2	1	5	7.6	7.6	83.134	0	0.0946648
PRMT1	Protein arginine N-methyltransferase 1	E9PKG1;Q99873-3;Q99873-2;Q99873-4;Q99873;H7C2I1;E9PIX6;E9PQ98;A0A087X1W2;E9PNR9;H0YDE4;Q9NR22-2;Q9NR22;E9PMW9;E9PI83	E9PKG1;Q99873-3;Q99873-2;Q99873-4;Q99873;H7C2I1;E9PIX6;E9PQ98;A0A087X1W2	0.20673	0.281101	0.169963	0.0457066	0.157198	-0.0257337	0.00122464	0.0473804	0.179995	0.401141	0.382288	0.35957	0.348637	0.467157	0.307577	-0.0139816	0.120389	-0.0264966	2.4958e-158	4737700000	2370800000	2366900000	9	7	7	9	6	9	9	7	8	12	10	13	13	12	13	7	4	7	15	48.3	48.3	37.709	0	-0.161023
RPL8	60S ribosomal protein L8	E9PKZ0;P62917;G3V1A1;E9PP36;E9PKU4	E9PKZ0;P62917;G3V1A1	-0.623284	NaN	-0.68589	-0.475018	NaN	-0.507329	NaN	NaN	NaN	-0.674958	-0.521945	-0.427885	NaN	NaN	NaN	NaN	-0.100147	NaN	6.5704e-17	463260000	253250000	210010000	2	0	2	2	1	2	1	1	1	2	3	2	1	1	1	1	2	1	3	13.7	13.7	22.389	0	0.163414
NPEPPS	Puromycin-sensitive aminopeptidase	E9PLK3;P55786;P55786-2;A6NEC2;H0YDG0;E9PP11;A6NEC2-2;E9PJY4;E9PPD4;A6NEC2-3;E9PI82;E9PJF9;E9PJ74;E9PPZ2	E9PLK3;P55786;P55786-2	0.490442	0.123634	0.343842	0.424831	0.232605	0.33003	0.193042	0.00472348	0.176803	0.458256	0.212318	0.195592	0.0145271	0.119223	0.0932273	-0.355287	0.0606525	-0.077574	5.5611e-64	1182400000	760940000	421500000	7	4	4	9	6	6	6	5	4	7	5	12	11	6	8	3	3	2	19	23.6	23.6	102.99	0	-0.0138125
RPL27A	60S ribosomal protein L27a	E9PLL6;P46776;E9PJD9;E9PLX7	E9PLL6;P46776;E9PJD9	-0.465889	-0.579589	-0.404974	-0.135897	-0.226918	-0.494254	-0.0696742	0.0423675	-0.265315	0.0569457	0.164835	0.0830011	0.090715	-0.0853215	-0.00980681	0.0958778	0.116237	-0.0586093	9.2355e-48	1968500000	1233100000	735450000	3	3	3	3	3	3	2	2	3	5	5	5	5	5	5	3	4	2	5	44.4	44.4	12.201	0	0.238971
VKORC1	Vitamin K epoxide reductase complex subunit 1	Q9BQB6-3;I3L3B4;F8W9H0;Q9BQB6-2;Q9BQB6;E9PLN8	Q9BQB6-3;I3L3B4;F8W9H0;Q9BQB6-2;Q9BQB6;E9PLN8	-0.350283	-0.357567	-0.354039	-0.947191	-0.944406	-0.977352	-2.55783	-2.57135	-2.56859	-4.77195	-4.52362	-4.55367	-4.98027	-5.01155	-5.03535	-0.559431	-0.319188	-0.411012	6.3297e-58	11305000000	3914900000	7390500000	3	3	3	3	3	3	3	3	3	2	3	2	3	2	3	3	3	3	3	27.2	27.2	9.8745	0	-0.593152
CSDE1	Cold shock domain-containing protein E1	E9PLT0;O75534-2;O75534;O75534-3;O75534-4;E9PNG3	E9PLT0;O75534-2;O75534;O75534-3;O75534-4	NaN	NaN	NaN	NaN	NaN	NaN	NaN	NaN	NaN	NaN	NaN	0.490708	0.370529	0.626916	0.785591	NaN	NaN	NaN	3.0337e-14	75328000	52442000	22885000	0	0	0	0	0	1	1	1	1	1	1	3	2	2	2	0	0	0	5	7.6	7.6	74.583	NaN	NaN
ARHGAP28	Rho GTPase-activating protein 28	E9PMX7;Q9P2N2-5;Q9P2N2;J3QKM0;Q9P2N2-3;Q9P2N2-2	E9PMX7;Q9P2N2-5;Q9P2N2;J3QKM0;Q9P2N2-3;Q9P2N2-2	NaN	NaN	NaN	-1.09893	NaN	-1.63567	-1.42134	NaN	NaN	-0.6137	-0.551932	-0.629808	-1.53899	-1.24891	-1.19062	NaN	NaN	NaN	1.6511e-06	101260000	47238000	54018000	1	1	1	2	1	2	2	1	1	2	2	2	2	2	2	1	0	0	2	3.7	3.7	64.154	NaN	NaN
CSRP1	Cysteine and glycine-rich protein 1	E9PND2;P21291;E9PS42;E9PP21	E9PND2;P21291;E9PS42;E9PP21	NaN	NaN	NaN	NaN	NaN	NaN	NaN	NaN	NaN	0.0226035	0.191255	0.214729	NaN	0.0692718	0.0956279	NaN	NaN	NaN	2.6211e-27	197430000	126780000	70648000	0	0	0	0	0	0	0	0	0	2	2	2	1	2	2	1	1	1	3	33.3	33.3	16.115	NaN	NaN
FAU	40S ribosomal protein S30	P62861;E9PR30	P62861;E9PR30	-0.410585	NaN	NaN	NaN	NaN	NaN	NaN	NaN	NaN	-0.36064	-0.341495	NaN	-0.198407	NaN	NaN	NaN	NaN	NaN	2.449e-09	481280000	296660000	184610000	2	1	1	1	1	1	1	1	1	2	2	1	2	1	1	0	0	1	2	18.6	18.6	6.6478	0	NaN
SEC16A	Protein transport protein Sec16A	F1T0I1;J3KNL6;O15027-2;O15027-4;O15027-3;O15027;O15027-5;Q8N9G1;A0A0C4DH09;X6RGP5	F1T0I1;J3KNL6;O15027-2;O15027-4;O15027-3;O15027;O15027-5	NaN	NaN	NaN	NaN	NaN	NaN	NaN	NaN	NaN	NaN	NaN	-0.123485	-0.0318998	-0.0283815	NaN	NaN	NaN	NaN	4.8521e-13	88738000	60663000	28075000	1	1	1	1	0	1	0	1	1	1	0	2	2	2	1	1	1	1	3	1.5	1.5	249.48	NaN	NaN
TRMT2A	tRNA (uracil-5-)-methyltransferase homolog A	Q8IZ69-2;Q8IZ69;F2Z2W7;C9K041;H7C100	Q8IZ69-2;Q8IZ69;F2Z2W7	0.512687	0.835621	0.612898	0.359452	0.607434	0.210218	-0.354225	0.0645984	-0.0778709	NaN	NaN	NaN	NaN	NaN	NaN	-0.18023	NaN	0.217442	1.2729e-33	208500000	131880000	76615000	7	3	4	5	6	6	3	2	2	1	0	0	0	1	0	2	1	2	12	26.5	26.5	61.978	0	-0.253446
PSMA1	Proteasome subunit alpha type-1	F5GX11;P25786;P25786-2;B4DEV8	F5GX11;P25786;P25786-2	0.625838	0.575394	0.705536	NaN	NaN	0.755546	0.952237	0.764388	0.827893	0.824948	0.431164	0.763832	0.857283	0.682124	0.670142	0.224721	0.519151	NaN	7.7414e-16	528180000	391500000	136670000	2	2	2	1	1	2	3	3	2	3	2	3	3	3	3	2	2	1	5	21	21	26.505	0	0.129708
OTUB1	Ubiquitin thioesterase OTUB1	F5GYN4;Q96FW1;J3KR44;F5H3F0;F5H6Q1;F5GYJ8;Q96FW1-2	F5GYN4;Q96FW1;J3KR44;F5H3F0;F5H6Q1;F5GYJ8;Q96FW1-2	NaN	0.453169	NaN	NaN	NaN	0.0846774	0.18968	NaN	NaN	NaN	-0.070004	0.231127	-0.2164	0.00401342	-0.163312	NaN	NaN	-0.0282497	4.6576e-13	229810000	145600000	84211000	1	2	1	1	1	2	2	1	1	1	2	2	2	3	2	1	0	2	3	17.4	17.4	28.05	0	-0.368492
SLC3A2	4F2 cell-surface antigen heavy chain	P08195-2;P08195-3;F5GZS6;P08195;J3KPF3;P08195-4;H0YFX4;F5GZI0;H0YFS2	P08195-2;P08195-3;F5GZS6;P08195;J3KPF3;P08195-4	NaN	NaN	NaN	NaN	NaN	NaN	NaN	NaN	NaN	0.48139	NaN	0.262681	NaN	NaN	0.255147	NaN	NaN	NaN	7.1757e-19	111710000	75229000	36482000	0	0	0	1	0	0	1	0	1	2	2	2	1	2	2	0	0	0	5	12.5	12.5	57.944	NaN	NaN
ARF3;ARF1;ARF5	ADP-ribosylation factor 3;ADP-ribosylation factor 1;ADP-ribosylation factor 5	P61204-2;P84077;P61204;F5H423;C9J1Z8;P84085	P61204-2;P84077;P61204;F5H423;C9J1Z8;P84085	NaN	NaN	NaN	NaN	NaN	NaN	NaN	NaN	NaN	0.0737632	NaN	0.0192783	NaN	NaN	-0.170616	NaN	NaN	NaN	9.4628e-12	93136000	59570000	33567000	0	0	0	0	0	0	0	0	0	2	1	2	1	1	2	0	0	0	2	20.1	12.5	16.145	NaN	NaN
TSG101	Tumor susceptibility gene 101 protein	F5H442;Q99816;Q99816-2;J3QRU6;J3QKS4	F5H442;Q99816;Q99816-2	NaN	NaN	NaN	NaN	NaN	NaN	NaN	NaN	0.547319	NaN	NaN	NaN	-0.233872	-0.0558965	-0.738446	NaN	NaN	NaN	1.7738e-13	148460000	93452000	55009000	1	0	1	0	0	1	1	0	3	1	1	1	2	2	2	1	0	1	5	16.4	16.4	40.917	NaN	NaN
MTCH1	Mitochondrial carrier homolog 1	F6WFU6;Q9NZJ7-2;Q9NZJ7;H0Y8C3	F6WFU6;Q9NZJ7-2;Q9NZJ7;H0Y8C3	NaN	NaN	NaN	NaN	NaN	NaN	NaN	NaN	NaN	-0.0444816	-0.401707	NaN	NaN	-0.0479243	0.08532	NaN	NaN	NaN	3.1985e-05	142330000	80611000	61719000	0	0	0	1	0	1	1	1	1	2	2	1	1	2	2	0	0	0	2	5.2	5.2	39.97	NaN	NaN
CAD	CAD protein;Glutamine-dependent carbamoyl-phosphate synthase;Aspartate carbamoyltransferase;Dihydroorotase	F8VPD4;P27708;H7C2E4;H7C3Z5;H7BZB3;P31327-2;P31327;P31327-3	F8VPD4;P27708	0.551032	0.493914	0.588473	0.440376	0.620985	0.544713	0.449436	0.445012	0.624853	0.533624	0.546301	0.551223	0.257043	0.362779	0.292207	0.502601	0.38122	0.30698	0	7902000000	5362900000	2539000000	33	18	23	31	25	25	31	24	33	29	27	31	33	30	34	24	15	21	54	33.3	33.3	236.02	0	-0.00631875
ATXN2	Ataxin-2	H0YH87;Q99700-2;Q99700-5;F8WB06;F8VQP2;V9GY86;Q99700-4;Q99700;F8VRK6;F8W0B5;F8WB05	H0YH87;Q99700-2;Q99700-5;F8WB06;F8VQP2;V9GY86;Q99700-4;Q99700;F8VRK6	NaN	NaN	NaN	NaN	NaN	NaN	NaN	NaN	NaN	NaN	0.217688	NaN	-0.0636305	NaN	-0.112616	NaN	NaN	NaN	6.2331e-15	70412000	43959000	26453000	1	0	1	0	0	1	1	1	1	1	2	1	2	1	2	1	0	0	3	5.1	5.1	98.004	NaN	NaN
CSRP2	Cysteine and glycine-rich protein 2	F8VQR7;Q16527;F8VW96	F8VQR7;Q16527;F8VW96	NaN	NaN	NaN	NaN	NaN	NaN	NaN	NaN	NaN	NaN	-0.13712	-0.270698	NaN	0.713824	NaN	NaN	NaN	NaN	5.0753e-06	30612000	19461000	11150000	0	0	0	0	0	0	0	0	0	1	2	2	1	2	0	0	0	0	2	18.2	18.2	20.677	NaN	NaN
PA2G4	Proliferation-associated protein 2G4	F8VR77;Q9UQ80-2;Q9UQ80;H0YIN7;F8W0A3	F8VR77;Q9UQ80-2;Q9UQ80;H0YIN7;F8W0A3	NaN	-0.0551169	0.209922	0.311955	0.0379885	-0.0652691	0.368459	NaN	0.0932761	0.0236051	0.207862	0.134424	0.0614518	0.0680253	0.154824	0.220992	NaN	NaN	8.9192e-25	250670000	161410000	89253000	1	2	2	2	2	2	2	1	2	2	2	2	2	2	2	2	1	0	2	9.9	9.9	31.467	0	-0.0394142
SMARCC2	SWI/SNF complex subunit SMARCC2	Q8TAQ2-2;Q8TAQ2-3;Q8TAQ2;F8VXC8;Q92922;F8VZW6	Q8TAQ2-2;Q8TAQ2-3;Q8TAQ2;F8VXC8	NaN	NaN	NaN	NaN	NaN	NaN	NaN	NaN	NaN	NaN	NaN	-0.834616	0.0370577	NaN	-0.706432	NaN	NaN	NaN	4.9432e-13	46033000	24956000	21078000	0	0	0	0	0	0	1	0	0	0	1	4	2	1	2	0	1	0	6	6.7	6.7	124.84	NaN	NaN
SPATS2L	SPATS2-like protein	F8W6C2;Q9NUQ6-2;Q9NUQ6;F2Z2S1;C9JKE4;F8VZ02;F8VT91;C9JGM8;A0A0A0MSG5;B8ZZZ7;Q9NUQ6-4;Q9NUQ6-3;Q4ZFW0;F8WAV0;C9IZC3;C9J8M7;C9JW67	F8W6C2;Q9NUQ6-2;Q9NUQ6;F2Z2S1;C9JKE4;F8VZ02;F8VT91;C9JGM8;A0A0A0MSG5;B8ZZZ7;Q9NUQ6-4;Q9NUQ6-3	NaN	NaN	NaN	NaN	NaN	NaN	NaN	NaN	NaN	NaN	NaN	NaN	-0.119441	NaN	-0.276807	NaN	NaN	NaN	2.9374e-09	74287000	43962000	30325000	0	0	0	0	1	1	0	1	0	1	1	1	2	1	3	1	1	1	3	16.6	16.6	29.939	NaN	NaN
HNRNPA1;HNRNPA1L2	Heterogeneous nuclear ribonucleoprotein A1;Heterogeneous nuclear ribonucleoprotein A1-like 2	P09651-3;F8W6I7;P09651-2;P09651;F8VZ49;Q32P51;F8VYN5;H0YH80;F8VTQ5;F8W646	P09651-3;F8W6I7;P09651-2;P09651;F8VZ49;Q32P51;F8VYN5;H0YH80	-0.900302	NaN	-0.568703	NaN	NaN	-0.756995	NaN	-0.716153	NaN	-1.30527	-1.24066	-1.32754	-1.1205	-1.17751	-1.29714	NaN	NaN	NaN	5.5118e-30	304240000	143700000	160530000	2	1	2	0	1	2	1	2	1	3	4	6	3	2	3	0	0	0	7	30.7	30.7	29.386	0	-0.0224922
TFRC	Transferrin receptor protein 1;Transferrin receptor protein 1, serum form	G3V0E5;P02786;H7C3V5	G3V0E5;P02786	-0.209643	-0.430211	-0.26976	-0.535226	-0.200762	-0.420893	-0.70446	-0.597132	-0.185373	-0.145335	0.190259	-0.146422	-0.0913075	-0.165311	-0.0324588	-0.0305938	NaN	0.0396968	3.1848e-89	1323600000	794390000	529230000	8	4	5	7	4	5	8	4	9	12	9	15	13	9	13	4	1	6	18	30.5	30.5	75.963	0	-0.151132
FRMD6	FERM domain-containing protein 6	G3V4T7;Q96NE9-2;Q96NE9;H0YJ19;Q96NE9-3;G3V3V8;H0YJC1;G3V2L4	G3V4T7;Q96NE9-2;Q96NE9	-0.48342	-0.102465	-0.0361959	-0.134258	-0.365015	-0.195811	-0.941532	-0.887276	-0.716821	-1.74738	-2.02417	-1.65988	-2.37693	-2.39364	-2.27365	-0.217007	-0.184443	-0.0937407	1.3291e-53	844740000	393310000	451430000	6	4	5	7	5	8	5	6	5	5	4	5	5	5	4	5	3	4	9	20.6	20.6	62.852	0	-0.0933468
COQ6	Ubiquinone biosynthesis monooxygenase COQ6	Q9Y2Z9-3;G3XA86;Q9Y2Z9;G3V2L5;G3V4A6;G3V434;G3V3A1;Q9Y2Z9-2;A0A0D9SFJ1	Q9Y2Z9-3;G3XA86;Q9Y2Z9;G3V2L5;G3V4A6;G3V434	0.629319	NaN	NaN	1.19961	0.826441	1.22508	NaN	NaN	NaN	NaN	NaN	0.0943173	NaN	0.0401905	NaN	NaN	NaN	NaN	1.2383e-09	87656000	58063000	29593000	2	1	1	2	2	3	1	0	0	1	1	2	1	2	0	0	0	0	3	6.8	6.8	48.593	0	0.570288
USP11	Ubiquitin carboxyl-terminal hydrolase;Ubiquitin carboxyl-terminal hydrolase 11	G5E9A6;P51784;Q5JXD3	G5E9A6;P51784	0.390062	0.498279	0.586494	0.374304	0.432215	0.541546	0.17084	0.123366	0.311287	-0.723472	-0.799171	-0.795186	-1.61475	-1.63122	-1.80604	-0.0186215	0.150698	0.0648717	2.4312e-161	2645900000	1597600000	1048300000	16	8	12	15	13	14	13	9	13	13	8	11	8	8	10	10	6	7	24	43.4	42.4	105.03	0	-0.0660644
SEC24C	Protein transport protein Sec24C	G5EA31;P53992;P53992-2	G5EA31;P53992	NaN	0.393867	NaN	0.643651	NaN	NaN	NaN	NaN	NaN	0.552588	0.435253	0.372952	0.344029	0.511229	0.499002	NaN	NaN	NaN	2.0858e-75	272010000	185360000	86655000	2	2	1	3	1	1	1	1	1	5	3	5	5	4	5	0	1	0	9	10.8	10.8	111.98	0	0.249783
DNM1L	Dynamin-1-like protein	O00429-4;O00429-5;O00429-3;G8JLD5;O00429-2;O00429;O00429-8;O00429-6;O00429-7;B4DPZ9;F8W1W3;F8VUJ9;F8VZ52;F8VR28;F8VYL3;B4DDQ3	O00429-4;O00429-5;O00429-3;G8JLD5;O00429-2;O00429;O00429-8;O00429-6;O00429-7	0.322705	NaN	NaN	NaN	NaN	NaN	-0.095782	NaN	-0.0676455	0.394116	0.157008	0.0653337	0.507972	0.490538	0.513768	NaN	NaN	NaN	6.5735e-67	419400000	293360000	126040000	2	1	0	2	0	1	2	1	2	6	2	6	6	7	5	1	0	0	11	21.5	21.5	78.099	0	NaN
ZYX	Zyxin	Q15942-2;H0Y2Y8;Q15942;C9JJK5;H7C3D3	Q15942-2;H0Y2Y8;Q15942;C9JJK5	NaN	NaN	NaN	NaN	NaN	NaN	NaN	NaN	NaN	NaN	0.297434	0.304163	NaN	NaN	NaN	NaN	NaN	NaN	7.3875e-33	55989000	39372000	16617000	0	0	0	0	0	0	0	0	1	1	2	2	1	1	0	0	0	0	3	11.6	11.6	45.075	NaN	NaN
AMPD2	AMP deaminase 2	Q01433-2;H0Y360;Q01433;Q01433-3;Q01433-5;Q01433-4;E9PJF6;H0YCL9;E9PIJ1;H0YF16	Q01433-2;H0Y360;Q01433;Q01433-3;Q01433-5;Q01433-4	NaN	NaN	NaN	NaN	NaN	NaN	NaN	NaN	NaN	-0.0501066	0.174508	-0.186207	0.967697	0.129315	NaN	NaN	NaN	NaN	1.0298e-18	111980000	59627000	52349000	0	1	1	0	0	0	1	0	1	2	2	3	2	4	1	1	0	0	5	6.6	6.6	92.07	NaN	NaN
IMPDH2	Inosine-5-monophosphate dehydrogenase 2	H0Y4R1;P12268;E7ETK5;C9K0R9	H0Y4R1;P12268	0.529862	0.440396	0.542301	0.62994	0.591804	0.601447	0.560362	0.544503	0.746173	0.260122	0.269483	0.259033	-0.135734	-0.135703	-0.0861227	0.0536719	0.0606525	0.118443	0	8579600000	5767100000	2812500000	19	14	14	16	14	18	16	14	20	15	12	18	17	14	17	15	5	10	23	60.2	60.2	50.957	0	0.0715854
PABPC4	Polyadenylate-binding protein 4	H0Y5F5;Q13310-2;Q13310-3;B1ANR0;Q13310;H0YEU6;H0YCC8;H0Y6X6;P0CB38	H0Y5F5;Q13310-2;Q13310-3;B1ANR0;Q13310;H0YEU6	0.154957	0.15753	0.188897	-0.0652912	0.114834	0.00198065	-0.269798	0.0313058	0.325098	0.114303	-0.0864792	0.0658511	-0.654343	0.0903628	-0.18516	NaN	0.408826	0.520953	6.618e-39	503110000	304210000	198900000	7	4	4	3	5	4	5	3	5	3	4	2	2	2	4	1	2	2	7	24.2	15.3	60.133	0	-0.15555
ADAR	Double-stranded RNA-specific adenosine deaminase	P55265-5;P55265-3;H0YCK3;P55265-2;P55265;P55265-4	P55265-5;P55265-3;H0YCK3;P55265-2;P55265;P55265-4	0.207819	NaN	NaN	-0.0224228	0.416449	0.411002	0.377059	NaN	0.639792	0.197694	-0.210096	-0.0271154	0.465644	-0.0436668	0.2913	NaN	NaN	-0.345552	9.1672e-43	461290000	292630000	168650000	4	2	0	3	2	3	3	1	2	4	2	3	4	3	6	1	0	2	12	16.6	16.6	103.64	0	0.203183
TAGLN	Transgelin	H0YCU9;Q01995;E9PJ32	H0YCU9;Q01995	NaN	NaN	NaN	NaN	NaN	NaN	NaN	NaN	NaN	0.266765	0.491053	0.29625	0.235442	0.309879	0.29493	NaN	NaN	NaN	6.2579e-116	585880000	403550000	182330000	0	0	0	0	0	1	1	1	0	6	5	8	6	6	2	1	1	1	9	58.3	58.3	16.733	NaN	NaN
ATP5B	ATP synthase subunit beta;ATP synthase subunit beta, mitochondrial	H0YH81;P06576;F8W079	H0YH81;P06576;F8W079	NaN	NaN	NaN	NaN	NaN	NaN	NaN	NaN	NaN	NaN	0.446961	0.51441	NaN	NaN	NaN	NaN	NaN	NaN	7.5227e-09	72912000	48246000	24665000	0	0	0	0	0	0	0	0	1	1	2	2	0	1	1	0	0	0	2	6.9	6.9	38.138	NaN	NaN
RPL28	60S ribosomal protein L28	P46779;P46779-2;P46779-3;H0YKD8;P46779-4;P46779-5;H0YMF4;H0YLP6	P46779;P46779-2;P46779-3;H0YKD8;P46779-4;P46779-5;H0YMF4;H0YLP6	-0.625595	-0.616936	-0.626613	-0.430235	-0.475137	-0.550562	-0.358824	-0.347188	-0.408514	-0.352627	-0.397832	-0.339904	-0.396777	-0.411973	-0.485344	-0.0174559	0.0412628	0.0451221	4.1808e-135	23371000000	13695000000	9676400000	10	12	11	11	11	11	12	10	11	7	7	8	7	8	7	11	11	11	14	49.6	49.6	15.747	0	0.150458
PSMA4	Proteasome subunit alpha type;Proteasome subunit alpha type-4;Proteasome subunit beta type	H0YMZ1;H0YN18;H0YL69;P25789;H0YKT8;H0YMI6;P25789-2;H0YMA1;H0YKS0;H0YLS6;H0YLC2	H0YMZ1;H0YN18;H0YL69;P25789;H0YKT8;H0YMI6;P25789-2;H0YMA1	NaN	NaN	NaN	NaN	NaN	NaN	NaN	NaN	NaN	-0.0788169	NaN	-0.00558321	0.312726	NaN	NaN	NaN	NaN	NaN	1.95e-13	106460000	69791000	36671000	0	0	0	0	0	0	0	0	0	2	2	3	2	2	1	0	0	0	3	11.8	11.8	24.526	NaN	NaN
USP3	Ubiquitin carboxyl-terminal hydrolase;Ubiquitin carboxyl-terminal hydrolase 3	Q6JHV3;H0YMI4;Q9Y6I4;H0YLB7;H0YKU8;Q9Y6I4-2;H0YL81;H0YM72;H0YMP6;H0YLG0	Q6JHV3;H0YMI4;Q9Y6I4;H0YLB7;H0YKU8;Q9Y6I4-2	0.452112	NaN	0.214996	NaN	0.40918	0.361463	0.336616	NaN	0.383542	-1.11478	-0.443011	NaN	NaN	NaN	NaN	NaN	NaN	NaN	7.7836e-16	133150000	83806000	49340000	5	0	3	1	3	2	4	1	3	2	2	1	1	0	0	1	0	0	6	15.9	15.9	56.648	0	0.0517676
DDX17	Probable ATP-dependent RNA helicase DDX17	Q92841-1;Q92841-3;Q92841-2;Q92841;H3BLZ8	Q92841-1;Q92841-3;Q92841-2;Q92841;H3BLZ8	NaN	NaN	NaN	NaN	NaN	NaN	NaN	NaN	NaN	-0.355039	-0.379309	NaN	-0.0692591	-0.43981	-0.182062	NaN	NaN	NaN	3.3023e-30	92707000	54564000	38144000	1	0	1	0	0	1	0	0	0	2	2	1	2	2	2	0	0	0	3	12.8	5.7	72.371	NaN	NaN
RPS15A	40S ribosomal protein S15a	H3BN98;I3L3P7;I3L246;P62244;H3BV27;H3BT37;I3L303;H3BPJ2;Q15041-3;Q15041-2;Q15041	H3BN98;I3L3P7;I3L246;P62244	-0.529061	-0.776196	-0.392058	-0.384667	-0.42719	-0.650767	-0.134143	-0.489525	-0.312311	-0.275888	-0.250854	-0.328138	-0.285415	NaN	-0.300025	NaN	NaN	NaN	9.8903e-14	380190000	220860000	159330000	4	3	2	2	3	3	2	2	2	3	3	2	3	1	3	0	0	0	4	16.5	16.5	27.168	0	0.101872
C16orf58	UPF0420 protein C16orf58	H3BR29;H3BSM7;Q96GQ5;Q96GQ5-2	H3BR29;H3BSM7;Q96GQ5;Q96GQ5-2	0.544843	0.514522	0.186037	0.291768	0.383373	0.421395	NaN	NaN	NaN	-0.45974	-0.387054	NaN	NaN	-0.917282	NaN	-0.716379	NaN	NaN	2.4319e-20	266160000	163120000	103040000	3	2	3	4	3	2	1	1	1	2	5	1	0	2	1	2	1	0	7	22.5	22.5	46.342	0	-0.131149
CIAPIN1	Anamorsin	H3BV90;Q6FI81-3;Q6FI81;H3BPG7;H3BT65;H3BQ23;H3BUG4;Q6FI81-2	H3BV90;Q6FI81-3;Q6FI81;H3BPG7;H3BT65;H3BQ23;H3BUG4	0.302285	0.266308	0.3638	-0.442356	NaN	-0.076551	-0.149024	-0.239125	0.287781	1.06771	NaN	0.945668	1.14644	NaN	1.18503	NaN	0.202276	NaN	2.916e-14	341570000	253730000	87836000	3	3	3	2	1	3	2	2	3	2	1	2	3	2	3	1	3	1	5	22	22	26.446	0	-0.561738
DHX30	Putative ATP-dependent RNA helicase DHX30	Q7L2E3-3;H7BXY3;Q7L2E3;Q7L2E3-2	Q7L2E3-3;H7BXY3;Q7L2E3;Q7L2E3-2	0.329615	NaN	0.345087	NaN	0.55893	-0.20769	0.442218	NaN	0.515426	-0.275595	-0.110239	-0.255391	0.0421767	0.154413	0.1393	NaN	NaN	NaN	5.4104e-31	218660000	144350000	74319000	2	0	2	0	3	2	3	0	3	3	2	2	4	5	2	0	0	0	8	8.1	8.1	129.44	0	-0.16173
PDIA3	Thioredoxin	H7BZJ3	H7BZJ3	NaN	NaN	NaN	NaN	0.594467	NaN	NaN	NaN	NaN	0.32395	0.299937	0.26393	0.219914	NaN	0.0532934	NaN	NaN	NaN	6.0883e-183	2684700000	1758100000	926660000	1	1	1	1	1	1	1	1	1	1	1	1	1	1	1	1	1	1	1	51.2	11.4	13.519	NaN	NaN
NUP98	Nuclear pore complex protein Nup98-Nup96;Nuclear pore complex protein Nup98;Nuclear pore complex protein Nup96	H7C3P6;P52948-6;P52948-5;P52948;P52948-2;H0YCT1;H0YDF4	H7C3P6;P52948-6;P52948-5;P52948;P52948-2	NaN	0.0992695	0.0337382	NaN	NaN	NaN	-0.589165	-0.287728	0.0627876	-0.187799	-0.55355	-0.104346	-0.614728	-0.396371	0.262394	NaN	NaN	NaN	9.4378e-25	209490000	127740000	81749000	1	3	2	1	1	1	2	2	3	3	2	3	3	3	3	0	0	0	5	6.9	6.9	85.676	0	NaN
UBE2V1;TMEM189	Ubiquitin-conjugating enzyme E2 variant 1	Q13404;Q13404-7;Q13404-2;Q13404-1;I3L0A0;Q13404-6;A0A0A0MSL3;G3V2F7;Q13404-8;E5RIF1;D6RG00	Q13404;Q13404-7;Q13404-2;Q13404-1;I3L0A0;Q13404-6;A0A0A0MSL3;G3V2F7;Q13404-8	NaN	NaN	NaN	NaN	NaN	NaN	NaN	NaN	NaN	-0.383253	NaN	NaN	0.488657	-0.229828	NaN	NaN	NaN	NaN	6.4496e-11	131300000	79583000	51712000	0	0	0	0	0	0	0	0	0	2	1	1	2	2	1	0	0	0	1	17.7	17.7	16.495	NaN	NaN
CLUH		I3L2B0;I3L318;I3L4B5	I3L2B0	0.744895	0.476983	0.621305	0.57177	0.615185	0.414688	0.123866	0.428277	0.528208	-0.250068	-0.130873	-0.0195116	-0.616113	-0.635869	-0.522868	0.267954	0.198203	0.260967	1.2018e-57	797880000	511580000	286300000	11	6	10	9	11	6	9	4	6	4	5	5	5	4	6	2	3	2	1	14.7	14.7	138.23	0	-0.0495347
GEMIN4	Gem-associated protein 4	I3L2C7;P57678;E7EN12;I3L4M4;I3L4A4;I3L399	I3L2C7;P57678	NaN	NaN	NaN	0.589494	NaN	NaN	NaN	NaN	NaN	NaN	NaN	-0.0454345	0.180339	NaN	0.195137	NaN	NaN	NaN	4.322e-13	103920000	69530000	34388000	1	0	1	2	0	1	1	1	1	1	1	2	2	1	2	0	0	1	4	4.9	4.9	118.82	NaN	NaN
CYB5B	Cytochrome b5 type B	J3KNF8;H3BUX2;O43169;D6RFH4;J3QR91	J3KNF8;H3BUX2;O43169;D6RFH4	-0.0181256	-0.158691	-0.0432561	-0.565872	-0.450001	-0.36105	-0.821131	-0.483285	-0.187877	-0.193843	-0.11434	-0.0776957	-0.87103	-0.669537	-0.837958	-0.242515	-0.327551	-0.398538	2.1311e-206	6619700000	3864800000	2754800000	4	5	5	4	3	5	4	3	4	5	5	5	5	5	5	5	3	4	5	59.3	59.3	16.694	0	-0.406744
LUC7L3	Luc7-like protein 3	O95232;J3KPP4;D6RDI2;E7EN55;O95232-2;C9JL41	O95232;J3KPP4;D6RDI2	NaN	NaN	NaN	NaN	NaN	NaN	NaN	NaN	NaN	-0.714875	-0.522198	NaN	-0.759188	-0.675122	-0.635157	NaN	NaN	NaN	1.5149e-181	367070000	178920000	188140000	1	1	1	1	1	1	1	1	1	3	2	1	3	2	2	1	1	1	4	12.7	12.7	51.466	NaN	NaN
ALDOA	Fructose-bisphosphate aldolase A;Fructose-bisphosphate aldolase	P04075;J3KPS3;P04075-2;H3BQN4;H3BPS8;H3BUH7;H3BR04;H3BMQ8;H3BU78;H3BR68;A0A087WXX2;P05062	P04075;J3KPS3;P04075-2;H3BQN4;H3BPS8;H3BUH7;H3BR04;H3BMQ8	-0.0536783	-0.043513	0.0285753	0.235719	0.0618268	0.0811971	0.215672	0.261994	0.129493	-0.0550774	0.0641733	0.0245882	0.174906	0.0999286	0.173527	0.100871	0.0901084	0.0947922	2.9525e-214	4523900000	2858700000	1665200000	9	9	8	8	8	9	10	9	8	11	8	10	8	8	8	5	5	4	14	42.9	42.9	39.42	0	0.12471
OLA1	Obg-like ATPase 1	Q9NTK5-3;Q9NTK5;J3KQ32;C9JCJ9;C9JTK6;Q9NTK5-2	Q9NTK5-3;Q9NTK5;J3KQ32;C9JCJ9;C9JTK6;Q9NTK5-2	NaN	NaN	NaN	NaN	NaN	NaN	NaN	NaN	NaN	NaN	0.346211	0.117615	NaN	NaN	0.00692019	NaN	NaN	NaN	3.2161e-25	63378000	39717000	23662000	1	0	0	0	0	0	0	0	0	0	2	1	1	0	1	0	0	1	2	9.4	9.4	31.44	NaN	NaN
TBCD	Tubulin-specific chaperone D	Q9BTW9;J3KR97;Q9BTW9-4;Q9BTW9-5;I3L439;I3L0V3;I3L163;A0A0J9YWI5;A0A0J9YVR1;I3L3H4;I3L131;I3L143;A0A0J9YVU1;I3L4D2;I3L1S3;Q9BTW9-3;I3L500;A0A0J9YYG2;Q9BTW9-2	Q9BTW9;J3KR97;Q9BTW9-4;Q9BTW9-5	0.29831	0.27083	0.236841	0.206799	0.204972	0.247821	0.181057	0.0955403	0.186835	0.297464	0.127942	0.165515	-0.143998	0.0990107	-0.0952886	0.0748024	0.0791479	-0.0092811	2.3946e-119	907830000	576430000	331410000	10	7	6	9	5	7	11	5	7	7	7	8	8	9	4	4	3	3	15	16.4	16.4	132.6	0	-0.0640312
ARHGDIA	Rho GDP-dissociation inhibitor 1	J3KRE2;J3KTF8;P52565;J3QQX2;J3KS60;P52565-2;J3KRY1	J3KRE2;J3KTF8;P52565;J3QQX2;J3KS60;P52565-2;J3KRY1	NaN	NaN	NaN	NaN	NaN	NaN	NaN	NaN	NaN	-0.119932	-0.574947	-0.487837	NaN	NaN	NaN	NaN	NaN	NaN	5.0557e-24	191300000	105930000	85366000	1	0	0	0	0	0	0	0	0	3	2	3	1	1	0	0	0	0	3	24.8	24.8	14.814	NaN	NaN
MPRIP	Myosin phosphatase Rho-interacting protein	J3KSW8;Q6WCQ1-3;Q6WCQ1;Q6WCQ1-2;H0Y2S9;H0Y7E2	J3KSW8;Q6WCQ1-3;Q6WCQ1;Q6WCQ1-2;H0Y2S9	NaN	NaN	NaN	NaN	NaN	NaN	NaN	NaN	NaN	0.437196	NaN	-0.45091	NaN	0.367158	NaN	NaN	NaN	NaN	1.2783e-07	36312000	25795000	10516000	0	0	0	0	0	0	0	0	0	3	1	2	0	2	1	0	0	0	3	6.3	6.3	95.928	NaN	NaN
DDX5	Probable ATP-dependent RNA helicase DDX5	P17844-2;P17844;J3KTA4;J3QSF1;J3KRZ1;J3QRQ7;X6RLV5;J3QR02;J3KRX8	P17844-2;P17844;J3KTA4;J3QSF1;J3KRZ1	-0.0441116	-0.342345	-0.347965	0.130745	0.13096	-0.110716	-0.199714	0.0289861	-0.170307	-0.544831	-0.683687	-0.657356	-0.883208	-0.698763	-0.630637	0.16092	NaN	NaN	1.3997e-37	852550000	463460000	389090000	5	4	3	6	3	4	5	5	4	6	7	10	5	5	4	4	1	1	7	20.4	20.4	60.563	0	0.47309
RPL19	Ribosomal protein L19;60S ribosomal protein L19	J3QR09;J3KTE4;P84098;J3QL15	J3QR09;J3KTE4;P84098;J3QL15	-0.381731	-0.353356	-0.401292	-0.219948	-0.302837	-0.350719	-0.13307	-0.121673	-0.347839	-0.158052	-0.259764	-0.162133	-0.373809	-0.277035	-0.311623	-0.030622	-0.0833298	0.00887996	1.7078e-153	5170000000	3065300000	2104700000	8	7	7	8	8	7	7	7	7	5	4	5	7	6	6	8	6	8	12	39.4	39.4	23.134	0	0.0788944
RPL18	60S ribosomal protein L18	Q07020;J3QQ67;Q07020-2;G3V203;H0YHA7;F8VUA6;F8VYV2;A0A075B7A0;F8VXR6	Q07020;J3QQ67;Q07020-2;G3V203;H0YHA7;F8VUA6;F8VYV2;A0A075B7A0	-0.514533	-0.517382	-0.553448	-0.248751	-0.310818	-0.483024	-0.160132	-0.236711	-0.325244	-0.332758	-0.323352	-0.189748	-0.381837	-0.429257	-0.51152	0.0844466	0.0450712	0.163856	0	116890000000	68627000000	48259000000	12	13	12	14	14	12	13	12	13	12	12	12	13	12	12	12	12	10	16	54.8	54.8	21.634	0	0.206563
SUZ12	Polycomb protein SUZ12	J3QQW9;Q15022	J3QQW9;Q15022	NaN	NaN	NaN	NaN	NaN	NaN	NaN	NaN	NaN	-0.225162	-0.022379	-0.268626	-0.00131142	-0.0476569	-0.111123	NaN	NaN	NaN	1.0563e-06	95419000	54335000	41083000	0	0	0	0	0	0	0	0	0	2	2	1	1	2	2	0	0	0	2	4.9	4.9	80.321	NaN	NaN
MYL12A;MYL12B;MYL9	Myosin regulatory light chain 12A;Myosin regulatory light chain 12B;Myosin regulatory light polypeptide 9	P19105;O14950;J3QRS3;P24844;J3KTJ1;P24844-2	P19105;O14950;J3QRS3;P24844	NaN	NaN	NaN	NaN	NaN	NaN	NaN	NaN	NaN	-0.130729	NaN	-0.047601	-0.0721774	-0.323188	NaN	NaN	NaN	NaN	9.1796e-54	193520000	116780000	76749000	0	0	0	0	0	0	0	0	0	4	1	5	3	2	0	0	0	0	5	38.6	38.6	19.794	NaN	NaN
BUB3	Mitotic checkpoint protein BUB3	J3QT28;O43684-2;O43684;J3QSX4	J3QT28;O43684-2;O43684;J3QSX4	NaN	NaN	NaN	NaN	NaN	NaN	NaN	NaN	NaN	0.156663	0.0939332	-0.190249	-0.110024	NaN	0.188762	NaN	NaN	NaN	8.2844e-30	95133000	60302000	34831000	0	1	0	0	1	0	0	0	1	3	2	5	3	1	2	0	0	0	6	26.3	26.3	31.703	NaN	NaN
BLMH	Bleomycin hydrolase	K7ES02;Q13867;K7ESE8;J3KSD8;J3KS79;K7ENH5	K7ES02;Q13867;K7ESE8;J3KSD8	NaN	NaN	NaN	NaN	NaN	NaN	NaN	NaN	NaN	0.64979	1.02212	0.679488	0.945166	0.847688	0.759205	NaN	NaN	NaN	3.5217e-12	137480000	97820000	39657000	0	0	0	0	0	0	0	0	0	2	2	3	2	1	2	0	0	0	3	13.5	13.5	37.198	NaN	NaN
SARS2	Serine--tRNA ligase, mitochondrial	Q9NP81;M0QWZ7;Q9NP81-2;B4DJM9;M0R2C6;M0R1C0;M0R2H5;M0QX29;M0R259	Q9NP81;M0QWZ7;Q9NP81-2;B4DJM9;M0R2C6	NaN	NaN	NaN	NaN	NaN	NaN	NaN	NaN	NaN	0.417688	NaN	0.182954	0.0870791	0.402525	0.233154	NaN	NaN	NaN	6.0653e-09	464860000	306140000	158720000	1	1	0	1	1	0	1	0	1	2	1	2	3	2	2	1	1	0	3	8.5	8.5	58.282	NaN	NaN
TXN2	Thioredoxin, mitochondrial	M0QXH0;Q99757	M0QXH0;Q99757	-0.0350756	0.0726549	0.210418	-0.764235	-0.587117	-0.5954	-0.797071	-0.757544	-0.771807	NaN	NaN	-1.96376	NaN	NaN	NaN	-0.00832505	0.00628853	NaN	1.5549e-59	903850000	437920000	465930000	2	2	3	2	2	2	2	2	2	1	1	2	1	1	1	2	2	1	3	64.1	64.1	7.0271	0	-0.668054
ZC3H4	Zinc finger CCCH domain-containing protein 4	M0QY97;Q9UPT8	M0QY97;Q9UPT8	NaN	NaN	NaN	NaN	NaN	NaN	NaN	NaN	NaN	0.0660176	1.2652	NaN	0.213475	-0.0428353	-0.0704135	NaN	NaN	NaN	6.7411e-16	171280000	106560000	64723000	0	0	0	0	0	0	0	0	0	3	3	1	3	2	2	1	0	0	5	11	11	95.425	NaN	NaN
AP2S1	AP-2 complex subunit sigma	P53680;M0R0N4;M0QYZ2;P53680-2;X6R390;M0QZ21;M0R1S0	P53680;M0R0N4;M0QYZ2;P53680-2;X6R390;M0QZ21	0.289947	0.193257	0.158161	0.603215	0.160061	0.268398	0.47304	0.969022	0.565815	0.0895955	NaN	0.173181	0.263219	0.373661	0.354525	-0.128021	NaN	-0.194677	9.9503e-30	1002800000	662760000	340000000	6	4	3	3	3	4	2	2	3	3	1	5	6	5	3	4	1	5	6	44.4	44.4	17.018	0	0.0751404
RPS11	40S ribosomal protein S11	M0QZC5;P62280;M0R1H6	M0QZC5;P62280	NaN	NaN	-0.29374	-0.118454	NaN	-0.17279	-0.0257	-0.138541	-0.186199	-0.175544	-0.328994	-0.431575	NaN	NaN	0.0807529	NaN	NaN	NaN	1.5708e-12	326760000	108800000	217960000	1	1	2	2	1	2	2	2	2	2	3	4	0	1	2	1	0	0	5	37.3	37.3	13.997	0	0.148118
RPS5	40S ribosomal protein S5;40S ribosomal protein S5, N-terminally processed	M0QZN2;M0R0F0;P46782;M0R0R2	M0QZN2;M0R0F0;P46782;M0R0R2	-0.0999862	NaN	NaN	NaN	NaN	NaN	NaN	NaN	NaN	-0.172856	NaN	-0.293614	-0.215284	-0.310963	-0.152786	NaN	NaN	NaN	6.3006e-23	299320000	179670000	119650000	2	1	0	1	0	1	1	0	1	3	1	1	1	3	3	1	1	1	4	40.3	40.3	14.763	0	NaN
RPL18A	60S ribosomal protein L18a	M0R3D6;M0R1A7;M0R117;Q02543;M0R0P7	M0R3D6;M0R1A7;M0R117;Q02543;M0R0P7	-0.396519	-0.567476	-0.552405	-0.48004	-0.412263	-0.408178	-0.257636	-0.313779	-0.296895	NaN	-0.261766	-0.283709	-0.25163	-0.270244	NaN	NaN	0.0593307	NaN	1.7108e-46	596170000	352740000	243430000	3	2	2	2	2	2	2	2	2	1	2	4	3	3	2	1	2	1	4	27.7	27.7	16.714	0	0.140141
RPS16	40S ribosomal protein S16	M0R210;P62249;M0R3H0;A0A087WZ27;M0QX76;M0R1M5;Q6IPX4	M0R210;P62249;M0R3H0;A0A087WZ27;M0QX76;M0R1M5;Q6IPX4	NaN	NaN	NaN	NaN	NaN	NaN	NaN	NaN	NaN	-0.487746	-0.294587	-0.381722	-0.489554	-0.527982	-0.687783	NaN	NaN	NaN	1.0627e-21	393530000	222700000	170830000	1	0	0	1	0	1	1	1	1	5	5	4	4	5	2	1	0	1	6	43.4	43.4	14.419	NaN	NaN
AIP	AH receptor-interacting protein;Peptidyl-prolyl cis-trans isomerase	O00170;E9PMH2;V9GYQ3	O00170;E9PMH2	0.597225	NaN	0.722716	NaN	0.114356	0.133	NaN	NaN	0.136323	0.557414	0.930481	0.46351	0.942275	0.79619	0.530406	NaN	0.188448	-0.953767	7.0384e-30	373320000	252680000	120640000	4	1	3	1	2	3	1	0	2	5	4	2	5	5	4	1	2	2	6	22.4	22.4	37.636	0	-0.536292
PGRMC1	Membrane-associated progesterone receptor component 1	O00264;O00264-2;U3KQM0;O15173;O15173-2	O00264;O00264-2	-0.720736	NaN	-0.365018	NaN	NaN	-0.647517	NaN	-0.235685	-0.850978	-0.470486	-0.244202	NaN	-0.254869	NaN	-0.147399	NaN	NaN	NaN	1.0506e-10	264230000	157510000	106720000	2	1	2	1	1	2	1	2	3	3	2	2	2	1	2	0	0	0	4	20	20	21.671	0	-0.10464
SUPT5H	Transcription elongation factor SPT5	O00267-2;O00267;M0QYL9	O00267-2;O00267	0.295243	0.191489	0.254486	0.288153	0.0902285	0.253947	-0.29549	-0.261198	-0.231326	-2.33187	-2.70464	-2.31624	-3.37554	-3.62693	-2.86913	0.0984031	0.175213	0.125996	1.1386e-186	2544900000	1430300000	1114700000	15	15	17	17	13	10	14	10	15	9	5	6	4	6	6	13	10	12	27	32	32	120.5	0	-0.00053829
CLIC1	Chloride intracellular channel protein 1	O00299	O00299	0.671376	0.630849	0.590454	0.803036	0.825707	0.738437	0.776753	0.725833	0.593524	-0.0812556	-0.0492471	-0.088968	-1.02569	-0.994711	-1.01824	0.114115	0.0937042	0.0342215	0	44221000000	28661000000	15560000000	14	11	10	14	11	13	14	10	12	14	13	15	14	11	14	13	8	13	16	82.6	82.6	26.922	0	0.172187
EIF3F	Eukaryotic translation initiation factor 3 subunit F	O00303;A0A0D9SEZ9	O00303	NaN	NaN	NaN	NaN	0.523177	NaN	NaN	NaN	NaN	NaN	-0.0248099	-0.0604331	-0.553176	-0.458074	0.17478	NaN	NaN	NaN	7.1922e-14	147800000	87483000	60322000	0	0	1	0	2	1	0	0	0	0	2	4	2	3	2	0	1	0	4	10.9	10.9	37.563	NaN	NaN
IPO5	Importin-5	O00410;O00410-3;H0Y8C6;O00410-2;E7ETV3;E7EQT5;E7EV12;C9JMV5;H0Y3V4;C9JZD8;E7EWK4;E7EX05;C9JQT6;E7ESA1;E7ESZ1;E7ETV8;C9J875;C9JZ53;C9JXE0;O60518	O00410;O00410-3;H0Y8C6;O00410-2	0.162844	0.171115	0.207693	0.0503313	0.192123	0.127252	-0.114677	-0.114679	-0.0405326	-1.37863	-1.34323	-1.2253	-2.64578	-2.68512	-2.58039	0.177625	0.0659062	0.122302	0	12251000000	6540500000	5711000000	35	24	23	28	26	32	33	20	30	27	22	28	21	17	20	30	23	28	42	55.8	55.8	123.63	0	-0.0438624
PSMD14	26S proteasome non-ATPase regulatory subunit 14	O00487	O00487	NaN	NaN	-0.336006	NaN	NaN	NaN	NaN	NaN	NaN	-0.408929	-0.77743	-0.497361	NaN	-0.229404	NaN	NaN	NaN	NaN	1.0258e-06	79650000	44708000	34942000	1	0	2	1	1	1	0	0	0	2	2	2	1	2	0	0	0	0	2	6.5	6.5	34.577	0	NaN
AP3D1	AP-3 complex subunit delta-1	O14617-5;O14617;O14617-4;O14617-2;O14617-3;K7ELX8;A0A087WYN6	O14617-5;O14617;O14617-4;O14617-2;O14617-3	0.175031	-0.0295144	0.036091	-0.243506	-0.235119	0.0471409	-0.158381	-0.163505	-0.0200754	-0.0693343	0.312908	-0.105774	-0.156056	0.0724652	-0.161799	-0.457281	-0.132206	-0.0527251	6.1231e-87	1456700000	895590000	561110000	9	9	8	12	7	11	11	7	9	6	9	10	7	9	11	7	6	5	20	21.3	21.3	136.65	0	-0.27121
BACH1	Transcription regulator protein BACH1	O14867;M0QZP0;H7C4B6;C9IYH8;C9JMP6;C9IYR0	O14867	0.621006	0.527682	0.489671	-0.234706	-0.0955895	-0.218226	-0.091036	0.233723	0.266524	0.766517	0.860943	0.908612	0.325446	0.464218	0.504695	0.183368	0.796341	NaN	5.0276e-46	864800000	551790000	313010000	6	7	6	5	4	6	4	4	6	7	8	6	5	7	7	4	2	1	11	18.6	18.6	81.957	0	-0.745908
HAT1	Histone acetyltransferase type B catalytic subunit	O14929;O14929-2;F8WEW1;F8W9G7	O14929;O14929-2	0.112562	0.0196925	-0.20562	-0.545196	-0.321583	-0.56431	NaN	NaN	-0.716285	0.128378	NaN	-0.153901	0.385157	0.403731	0.242574	NaN	-0.14069	-0.162969	6.5771e-35	327980000	203010000	124980000	2	2	2	3	2	2	1	1	3	3	1	5	3	2	3	1	2	2	5	13.8	13.8	49.512	0	-0.564889
UQCRQ	Cytochrome b-c1 complex subunit 8	O14949	O14949	0.104781	0.136492	0.0414067	0.284297	0.247981	0.186852	0.371015	0.352382	0.158485	0.0392049	0.0375735	0.0711714	-0.0743341	-0.0807289	0.0450008	-0.0587566	0.172207	0.177391	1.008e-77	3321900000	2159800000	1162100000	4	4	4	5	5	4	4	4	4	3	3	4	4	4	4	5	5	5	6	58.5	58.5	9.9062	0	0.1432
XPO1	Exportin-1	O14980;C9JKM9;C9J673;C9IZS4;C9JQ02;C9JV99;C9JF49;C9IYM2;F8WF71;H7BZC5	O14980	0.125592	0.0568292	0.0605673	-0.213776	-0.414127	-0.24275	0.274392	0.0893169	-0.155109	-0.0438688	-0.153918	-0.0127704	0.119143	-0.00749857	0.18569	-0.411174	-0.261128	-0.431385	1.9843e-158	1579700000	973940000	605770000	7	2	6	9	2	3	6	2	2	16	6	13	16	11	18	6	4	3	23	26.6	26.6	123.38	0	-0.303317
PFAS	Phosphoribosylformylglycinamidine synthase	O15067;H0YGH1;J3KTQ5;J3KT98;J3QSG0;J3QSH6	O15067	-0.479953	-0.444243	-0.0749113	-0.259207	-0.417001	-0.307509	-0.00383425	-0.412008	-0.239488	-0.196646	-0.204851	-0.131701	-0.316771	-0.0920017	-0.151119	-0.330843	-0.181395	-0.386446	7.5784e-93	948390000	552900000	395490000	3	3	4	6	3	6	4	4	4	8	8	8	6	9	6	6	3	3	13	11.1	11.1	144.73	0	0.136734
ARPC3	Actin-related protein 2/3 complex subunit 3	O15145;C9JZD1;F8VR50	O15145;C9JZD1	NaN	NaN	NaN	NaN	NaN	NaN	NaN	NaN	NaN	0.0937966	-0.13242	0.0821194	-0.129874	0.131857	NaN	NaN	NaN	NaN	3.5694e-11	64609000	39157000	25453000	0	0	0	0	0	0	0	0	0	2	2	3	2	2	0	0	0	0	3	17.4	17.4	20.546	NaN	NaN
OGT	UDP-N-acetylglucosamine--peptide N-acetylglucosaminyltransferase 110 kDa subunit	O15294;O15294-3;O15294-4;O15294-2;C9JZL3	O15294;O15294-3;O15294-4;O15294-2	0.879701	1.07211	NaN	0.446879	0.469609	0.89471	0.464858	NaN	NaN	0.232603	0.448812	0.330488	0.668072	0.249981	0.705421	NaN	NaN	NaN	9.7534e-42	263510000	178600000	84909000	2	2	1	2	3	2	3	1	0	2	3	7	4	5	5	0	0	1	8	9.5	9.5	116.92	0	-0.506297
PPM1G	Protein phosphatase 1G	O15355	O15355	0.0300614	-0.158126	NaN	-0.300394	0.104419	NaN	NaN	NaN	NaN	0.122038	0.187167	0.0102881	0.488037	0.581291	0.381906	NaN	NaN	NaN	5.4253e-17	245040000	160360000	84683000	2	2	1	2	2	1	0	1	1	2	2	2	2	3	3	1	0	0	3	7.3	7.3	59.271	0	-0.0339553
MAGEB2	Melanoma-associated antigen B2	O15479	O15479	NaN	NaN	NaN	NaN	NaN	NaN	NaN	NaN	NaN	0.0255586	0.385734	-0.0614058	0.0864845	0.148917	0.39218	NaN	NaN	NaN	1.0371e-31	140500000	92077000	48422000	0	0	1	0	0	0	0	0	0	1	1	1	1	1	1	1	1	1	1	5	5	35.277	NaN	NaN
DHX15	Putative pre-mRNA-splicing factor ATP-dependent RNA helicase DHX15	O43143	O43143	-0.0100441	0.0455462	0.140535	-0.33366	-0.0608995	-0.209638	-0.294799	NaN	0.0186908	0.337426	0.00492621	-0.276875	-0.0387438	-0.10437	-0.0854997	NaN	NaN	NaN	5.7545e-42	463950000	285840000	178110000	4	3	2	3	2	3	3	1	3	4	3	5	4	4	6	1	1	0	9	13.1	13.1	90.932	0	-0.255184
PHGDH	D-3-phosphoglycerate dehydrogenase	O43175;Q5SZU1	O43175;Q5SZU1	0.138472	0.116378	-0.0967526	0.16167	0.108963	0.140026	0.236497	0.130273	0.116374	0.170761	0.201107	0.145922	0.354239	0.464256	0.328981	-0.511706	-0.520038	-0.468442	5.8594e-271	5685800000	3696700000	1989100000	10	9	8	8	9	10	10	9	10	12	11	15	14	13	15	11	9	9	18	42.4	42.4	56.65	0	0.0236479
ZW10	Centromere/kinetochore protein zw10 homolog	O43264;O43264-2;F5H3C1	O43264;O43264-2	NaN	NaN	NaN	NaN	NaN	NaN	NaN	NaN	NaN	0.583951	NaN	NaN	NaN	0.756893	0.10752	NaN	NaN	NaN	6.3676e-38	129660000	81998000	47665000	0	0	1	1	0	0	1	0	0	2	0	1	2	3	2	0	0	0	5	8.5	8.5	88.828	NaN	NaN
MAP3K7;DKFZp586F0420	Mitogen-activated protein kinase kinase kinase 7	O43318-2;O43318;Q9UG54;O43318-4;O43318-3	O43318-2;O43318;Q9UG54;O43318-4;O43318-3	0.563173	0.526897	0.53616	0.493641	0.449849	0.375694	0.0113722	0.424683	0.348851	-1.4221	-1.31936	-1.36953	-2.86112	NaN	-2.84179	-0.125517	-0.160821	-0.153569	1.1027e-38	788820000	439050000	349770000	6	5	3	6	5	7	5	5	5	4	4	4	2	1	3	3	4	3	9	19.2	19.2	64.229	0	-0.0863113
TXNL1	Thioredoxin-like protein 1	O43396;K7ER96;K7EML9;K7EPB7;K7EME7;K7EKG2	O43396;K7ER96	-0.222514	-0.179843	0.0637004	-1.21632	-0.826269	-0.873426	-1.33921	-1.2461	-0.71385	-1.46649	-1.45852	-1.56105	-3.61732	-2.98263	-3.22523	0.165563	0.221791	0.161011	8.1717e-257	5116700000	2554100000	2562600000	13	10	10	10	10	11	11	9	12	11	8	7	8	5	7	11	9	10	15	63.3	63.3	32.251	0	-0.693583
XPOT	Exportin-T	O43592;F8WDU6;F5GYW6	O43592	0.510082	0.0133731	-0.0104652	0.267767	NaN	NaN	NaN	NaN	0.143283	-0.3798	-0.318057	-0.39197	NaN	-1.25737	-2.03763	NaN	-0.302401	-0.101297	3.576e-35	257040000	148890000	108140000	5	3	3	3	1	1	1	0	3	3	3	6	1	4	2	2	3	2	13	15.5	15.5	109.96	0	0.254394
ACTN4	Alpha-actinin-4	O43707;O43707-2;O43707-3;F5GXS2;H7C144;K7EJH8	O43707;O43707-2	NaN	NaN	NaN	NaN	NaN	NaN	NaN	NaN	NaN	0.122809	0.0664291	-0.215455	0.111514	-0.196134	-0.191312	NaN	NaN	NaN	6.3098e-208	545560000	324710000	220850000	1	0	0	0	0	1	0	0	1	6	7	7	5	6	4	0	0	0	9	25.7	12.4	104.85	NaN	NaN
AP1G1	AP-1 complex subunit gamma-1	O43747;O43747-2;H3BR36;H3BUN9;H3BNR4;B3KNW1	O43747;O43747-2	NaN	NaN	NaN	NaN	NaN	NaN	NaN	NaN	NaN	NaN	0.0830638	-0.873551	NaN	0.250113	0.602513	NaN	NaN	NaN	2.0653e-08	76892000	46946000	29945000	0	0	1	0	0	0	1	0	0	1	3	2	1	2	2	0	0	0	4	4.6	4.6	91.35	NaN	NaN
DFNA5	Non-syndromic hearing impairment protein 5	O60443;H7C3W1;O60443-3;H7C147;H7BZJ0;O60443-2;C9JSR4	O60443;H7C3W1;O60443-3	0.0529075	-0.0646293	0.0408712	-0.264311	-0.22066	-0.202977	-0.526797	-0.525867	-0.21762	-1.43169	-1.30296	-1.45173	-2.88417	-3.24486	-2.71455	-0.0419641	-0.186257	-0.0859714	1.8633e-104	2369800000	1123800000	1246100000	10	11	10	8	7	12	8	9	8	10	8	9	5	5	6	9	6	7	14	36.5	36.5	54.554	0	-0.261531
SYNCRIP;HNRNPR	Heterogeneous nuclear ribonucleoprotein Q;Heterogeneous nuclear ribonucleoprotein R	O60506-4;O60506-3;O60506-2;O60506;B7Z645;F6UXX1;O60506-5;O43390;O43390-2;O43390-4;O43390-3;B4DT28	O60506-4;O60506-3;O60506-2;O60506;B7Z645;F6UXX1;O60506-5;O43390;O43390-2	-0.378151	-0.475434	-0.644687	-0.449792	-0.189197	-0.582481	NaN	NaN	NaN	-0.316229	-0.242729	-0.451595	-0.237526	-0.423993	-0.166285	0.182551	NaN	NaN	9.6597e-39	394400000	234750000	159650000	4	2	2	3	2	3	1	0	0	5	4	3	3	5	4	2	0	0	5	11.2	11.2	58.735	0	0.0256424
BUB1B	Mitotic checkpoint serine/threonine-protein kinase BUB1 beta	O60566;O60566-3;O60566-2	O60566;O60566-3;O60566-2	NaN	NaN	NaN	0.230371	NaN	0.0702351	NaN	NaN	-0.144249	NaN	NaN	-0.603969	NaN	-0.66865	NaN	NaN	NaN	NaN	4.7864e-11	93583000	51451000	42132000	1	1	0	3	1	2	1	0	3	1	1	2	1	2	0	0	0	0	4	5	5	119.54	NaN	NaN
PLIN3	Perilipin-3	O60664-4;O60664;O60664-3;K7ERZ3;K7EL96;O60664-2;K7ER39	O60664-4;O60664;O60664-3;K7ERZ3;K7EL96;O60664-2	-0.0389044	-0.155144	-0.178115	-0.236147	-0.160788	-0.299017	-0.0932895	-0.389311	-0.0333723	0.351931	0.235574	0.182807	0.437874	0.379402	0.388678	-0.266648	-0.340779	-0.424592	5.9229e-73	761980000	504210000	257770000	3	3	3	3	4	4	2	2	4	6	5	6	5	5	5	2	2	2	8	26.8	26.8	45.803	0	-0.0810034
PRAF2;WDR45	PRA1 family protein 2	O60831;A6NP52;A6NM71	O60831;A6NP52;A6NM71	0.260102	0.225965	0.137804	0.522598	0.433257	0.575883	0.581246	0.45775	0.378338	0.416305	0.219718	-0.0395481	0.302658	0.269206	0.103166	0.151328	-0.280064	0.166502	2.516e-39	695140000	447230000	247910000	3	3	3	4	4	4	3	3	4	4	4	4	4	4	4	3	2	3	4	26.4	26.4	19.258	0	0.296634
WDR1	WD repeat-containing protein 1	O75083;D6RD66;O75083-3	O75083;D6RD66;O75083-3	-0.162428	-0.497809	-0.0623265	0.0140538	-0.360425	-0.511455	-0.131673	-0.135324	-0.00170318	-0.0804192	0.0281561	0.00315186	-0.364088	NaN	-0.117842	NaN	NaN	NaN	3.205e-47	303720000	187510000	116210000	2	2	2	3	3	2	5	3	5	2	3	7	4	1	3	1	0	1	9	17.5	17.5	66.193	0	-0.197997
CPNE3	Copine-3	O75131;A0A087WYQ3;H0YB26;E5RHZ0;Q86YQ8-2;Q9HCH3-2;Q96FN4-2;Q96FN4;E7ENV7;Q8IYJ1;Q96A23;O95741;Q9UBL6-2;Q86YQ8;Q96A23-2;Q9HCH3;O95741-2;Q9UBL6	O75131	0.12022	NaN	0.239695	NaN	-0.248088	NaN	NaN	NaN	NaN	0.103267	0.498358	0.224089	0.210403	0.431755	0.457839	0.347481	NaN	NaN	3.1537e-28	554730000	196390000	358330000	2	0	2	0	2	0	1	1	0	2	2	4	4	6	2	2	0	1	7	16.2	16.2	60.13	0	-0.428046
RNF40	E3 ubiquitin-protein ligase BRE1B	O75150-3;O75150;O75150-4;H3BP71;H3BS50;H3BQ99;H3BUL6;I3L332;Q5VTR2	O75150-3;O75150;O75150-4;H3BP71	0.301009	-0.348052	-0.547867	NaN	NaN	0.156312	-0.734043	NaN	-0.359887	0.0718495	0.108355	NaN	0.252227	0.0408727	0.0136605	NaN	NaN	NaN	6.1614e-26	185480000	116300000	69181000	2	2	2	0	0	2	3	1	2	4	4	1	2	3	4	0	0	0	6	8.5	8.5	94.795	0	0.504364
FLNB	Filamin-B	O75369-2;O75369-9;O75369;O75369-8;O75369-6;O75369-3;E7EN95;O75369-7;O75369-5;O75369-4;A0A0A0MT44;H7C5L4	O75369-2;O75369-9;O75369;O75369-8;O75369-6;O75369-3;E7EN95;O75369-7;O75369-5;O75369-4	-0.698804	-0.470789	-0.405043	-0.783018	-0.336753	-0.655292	-0.804102	-0.514941	-0.468355	0.318393	0.381405	0.36124	0.354126	0.552873	0.467791	0.181407	0.124295	0.0543923	6.5347e-197	1174400000	787190000	387230000	6	3	7	3	4	2	5	3	4	17	10	19	21	16	19	4	3	2	33	20.4	16.3	275.66	0	-0.184503
PMPCB	Mitochondrial-processing peptidase subunit beta	O75439;G3V0E4;F8WAZ6;F8WEA6;F8WBE1	O75439;G3V0E4	0.716296	0.886527	NaN	1.76554	2.03745	1.57353	NaN	2.4119	NaN	NaN	NaN	NaN	NaN	NaN	NaN	NaN	NaN	NaN	5.5047e-14	123670000	100290000	23377000	4	3	1	2	2	3	1	2	1	0	1	1	1	1	0	0	0	0	4	9.2	7.8	54.366	0	0.964123
SF3B1	Splicing factor 3B subunit 1	O75533;H7C341	O75533	-0.196071	0.158873	0.137905	0.15986	0.346263	0.27333	0.267969	0.325361	0.155569	-0.119537	-0.100353	0.111952	0.274938	0.0886277	0.0404778	0.0774428	-0.0230444	0.0224719	2.9492e-65	682470000	427670000	254800000	6	7	5	5	3	3	6	5	3	9	6	10	6	9	8	2	2	4	12	11.7	11.7	145.83	0	0.135425
PRKRA	Interferon-inducible double stranded RNA-dependent protein kinase activator A	O75569-3;O75569-2;O75569;F8WEG8;G5E9Q4;C9JMM3	O75569-3;O75569-2;O75569;F8WEG8;G5E9Q4;C9JMM3	NaN	NaN	NaN	NaN	NaN	NaN	NaN	NaN	NaN	NaN	NaN	-0.834777	-0.409413	0.105717	-0.389997	NaN	NaN	NaN	2.2521e-18	122650000	60716000	61935000	0	0	0	0	0	0	0	0	0	0	1	2	2	3	2	0	0	0	3	13.9	13.9	31.635	NaN	NaN
TIPRL	TIP41-like protein	O75663-2;O75663	O75663-2;O75663	NaN	NaN	NaN	NaN	NaN	NaN	NaN	NaN	NaN	-0.0501309	NaN	NaN	NaN	0.198485	-0.117793	NaN	NaN	NaN	9.9725e-10	76360000	50365000	25995000	0	0	1	1	0	1	0	0	0	1	1	0	1	2	1	0	0	0	2	18.5	18.5	20.214	NaN	NaN
GLRX3	Glutaredoxin-3	O76003	O76003	NaN	NaN	NaN	NaN	NaN	NaN	NaN	NaN	NaN	0.302754	0.758869	0.371369	NaN	0.458889	0.244516	NaN	NaN	NaN	2.8274e-66	355770000	246930000	108830000	0	1	0	0	0	0	0	0	0	3	3	3	0	3	3	0	0	0	3	15.8	15.8	37.432	NaN	NaN
GLS	Glutaminase kidney isoform, mitochondrial	O94925-3;O94925;H7BZD1;C9JIJ6;B8ZZA8;O94925-2	O94925-3;O94925	NaN	NaN	NaN	-0.153917	NaN	NaN	NaN	0.0642375	0.0194652	NaN	0.588771	0.53033	0.519036	0.529385	0.629472	NaN	NaN	NaN	4.8258e-10	190300000	130400000	59902000	0	0	0	2	1	1	1	2	2	2	2	2	3	2	2	0	1	0	3	6.5	6.5	65.459	NaN	NaN
USP19	Ubiquitin carboxyl-terminal hydrolase 19;Ubiquitin carboxyl-terminal hydrolase	O94966-7;O94966-6;O94966-5;O94966-4;O94966-3;O94966;E7EST9;B5MEG5;E7ESU0;A0A0A0MR08;O94966-2;H0YB23	O94966-7;O94966-6;O94966-5;O94966-4;O94966-3;O94966;E7EST9;B5MEG5;E7ESU0	0.899389	0.767642	0.628293	0.736589	0.688004	1.05384	0.179029	0.127223	0.2541	-1.93063	-1.80035	-1.74734	NaN	-2.50986	NaN	-0.163645	0.0878686	-0.0577073	4.5357e-92	1035800000	669030000	366730000	15	11	7	8	12	13	6	4	8	3	2	3	1	3	1	6	5	4	20	23.8	23.8	150.66	0	-0.0310538
RTN3	Reticulon-3	O95197-3;O95197-4;O95197-7;O95197-2;O95197;O95197-5;B7Z4M1;O95197-6;F5H891;F5GWG7;F5H617	O95197-3;O95197-4;O95197-7;O95197-2;O95197;O95197-5	-0.118533	-0.0896486	-0.116518	-0.319288	-0.311596	-0.427603	-0.764723	-0.730886	-0.57396	-2.37084	-2.43949	-2.31896	-3.13063	-3.23782	NaN	-0.13826	-0.135046	-0.519492	2.0692e-244	7269800000	3599500000	3670300000	4	3	4	4	3	3	2	2	3	2	1	1	2	3	1	2	2	3	5	33.5	33.5	25.609	0	-0.20277
KIF20A	Kinesin-like protein KIF20A	O95235-2;O95235	O95235-2;O95235	NaN	NaN	NaN	NaN	NaN	NaN	NaN	NaN	NaN	0.353609	0.742889	0.516567	0.665358	0.896144	0.49095	NaN	NaN	NaN	3.21e-15	92015000	47547000	44468000	0	0	0	0	0	0	0	0	0	2	3	2	2	3	3	0	0	0	3	4.9	4.9	98.099	NaN	NaN
KIF4A	Chromosome-associated kinesin KIF4A	O95239;O95239-2;Q2VIQ3	O95239;O95239-2	-0.157932	NaN	0.170515	-0.236976	NaN	NaN	NaN	NaN	NaN	0.0620284	0.19991	0.124179	0.0984241	0.0211328	-0.171837	NaN	NaN	NaN	1.4727e-31	247490000	160640000	86849000	3	1	4	2	1	1	1	0	1	3	3	4	3	7	5	0	0	0	10	9.4	9.4	139.88	0	-0.243268
SMC2	Structural maintenance of chromosomes protein 2	O95347;O95347-2;A0A0C4DGE5;Q5T821	O95347;O95347-2	NaN	NaN	NaN	-0.535474	NaN	NaN	NaN	NaN	NaN	-0.68788	NaN	-0.509036	-0.206244	-0.354569	-0.254097	NaN	NaN	NaN	1.5753e-23	292530000	139650000	152880000	1	1	1	3	0	1	1	0	1	3	1	5	4	4	4	1	0	0	7	6.6	6.6	135.65	NaN	NaN
IPO7	Importin-7	O95373;E9PLB2;E9PLJ0	O95373	-0.295686	NaN	NaN	0.325036	NaN	NaN	0.353517	NaN	NaN	0.178205	0.241204	0.00150992	0.37194	0.248766	0.101973	NaN	NaN	NaN	3.3476e-76	362060000	233790000	128270000	3	0	1	4	0	1	2	0	1	4	2	4	8	3	4	1	1	0	10	13.9	13.9	119.52	0	0.620722
NADK	NAD kinase	O95544;O95544-2;A0A0A0MR98;O95544-3;J3KSP9	O95544;O95544-2;A0A0A0MR98;O95544-3	-0.152709	-0.472917	-0.284065	NaN	-1.39189	-1.60078	-1.72246	NaN	-1.05664	NaN	-1.56781	-1.41317	-2.93222	-1.77585	NaN	0.252781	0.399017	0.357998	8.0029e-16	325820000	160550000	165280000	2	2	3	1	2	2	2	0	2	1	2	4	2	3	1	3	3	2	5	13.2	13.2	49.228	0	-1.21227
ACSL3	Long-chain-fatty-acid--CoA ligase 3	O95573;O60488-2;O60488	O95573	NaN	NaN	NaN	NaN	NaN	NaN	NaN	NaN	NaN	NaN	-0.155855	-0.425485	0.345264	NaN	NaN	NaN	NaN	NaN	1.059e-15	43732000	24836000	18896000	0	0	0	0	0	0	0	1	0	0	2	3	2	0	1	0	0	0	4	8.1	8.1	80.419	NaN	NaN
CDS2	Phosphatidate cytidylyltransferase 2	O95674	O95674	NaN	NaN	NaN	NaN	NaN	NaN	NaN	NaN	NaN	NaN	NaN	NaN	-0.00439957	NaN	-0.192701	NaN	NaN	NaN	3.5092e-07	85770000	58971000	26799000	0	1	0	1	0	1	0	0	0	1	1	1	1	1	1	0	0	0	2	6.1	6.1	51.417	NaN	NaN
TXNDC12	Thioredoxin domain-containing protein 12	O95881;V9GY50;V9GYV4	O95881	0.298048	0.344929	0.137332	0.0471138	0.133318	0.138572	-0.558438	-0.417767	-0.626599	-2.64654	-2.52375	-2.49016	-3.40536	-3.02294	-3.4385	-0.136218	0	-0.0949636	9.8186e-75	9553900000	5953700000	3600200000	5	8	7	7	8	8	6	5	5	6	5	5	5	4	5	7	6	6	9	66.9	66.9	19.206	0	-0.164731
TOMM40	Mitochondrial import receptor subunit TOM40 homolog	O96008-2;O96008;K7EKG4;K7EJ57	O96008-2;O96008;K7EKG4;K7EJ57	-0.714403	0.473637	0.0244271	0.232695	0.434636	0.317626	0.538817	0.441142	0.584463	0.175919	NaN	0.17412	0.256022	0.711016	0.512598	NaN	NaN	0.395318	7.4722e-21	590850000	407970000	182890000	3	2	2	3	4	4	2	2	2	3	2	3	3	2	3	2	0	2	4	13.7	13.7	34.441	0	0.293199
LDHA	L-lactate dehydrogenase A chain	P00338;P00338-3;P00338-5;P00338-2;F5GXY2;P00338-4;F5GYU2;F5GXH2;F5H5J4;F5H6W8;F5GZQ4;F5H8H6;F5GXC7;F5GWW2;F5GXU1	P00338;P00338-3;P00338-5;P00338-2;F5GXY2;P00338-4;F5GYU2;F5GXH2	-0.308873	-0.43121	-0.323042	-0.232322	-0.346849	-0.309223	-0.176687	-0.178091	-0.338667	-0.225335	-0.152589	-0.0294627	-0.0913352	-0.10776	-0.0556516	-0.00746595	0.0219777	0.0940586	6.1062e-241	5406600000	3281600000	2124900000	10	9	9	11	10	10	9	9	10	9	10	10	10	9	10	8	7	7	13	44.3	40.7	36.688	0	0.0138197
GOT2	Aspartate aminotransferase, mitochondrial	P00505-2;P00505	P00505-2;P00505	NaN	NaN	NaN	NaN	NaN	NaN	NaN	NaN	NaN	0.410314	0.180892	-0.377783	-0.566292	-1.42517	0.708357	NaN	NaN	NaN	3.2854e-38	260970000	148140000	112830000	1	0	0	1	1	1	1	0	1	2	4	4	4	3	2	0	0	0	6	18.1	18.1	43.029	NaN	NaN
PGK1	Phosphoglycerate kinase 1	P00558;P00558-2;P07205	P00558;P00558-2	-0.124132	0.126509	-0.223984	0.142956	0.0784743	-0.0615548	0.0419596	0.344766	-0.0883284	-0.174783	-0.00548849	-0.0717417	-0.0387438	0.0373228	-0.156256	-0.262286	-0.0908957	-0.298949	3.6839e-303	2940100000	1805600000	1134500000	5	2	2	5	2	5	6	3	6	12	12	15	12	13	11	4	3	4	16	48.9	48.9	44.614	0	0.202606
LMNA	Prelamin-A/C;Lamin-A/C	P02545-2;P02545-6;P02545;Q3BDU5;P02545-3;Q5TCI8;P02545-5;P02545-4;H0YAB0;A0A0C4DGC5	P02545-2;P02545-6;P02545;Q3BDU5;P02545-3;Q5TCI8;P02545-5;P02545-4	-1.50199	NaN	NaN	NaN	NaN	NaN	-1.38068	NaN	-1.04016	-1.25098	-1.11197	-0.935401	-1.03176	-0.87283	-1.06867	NaN	NaN	NaN	8.5291e-36	355620000	173470000	182160000	2	1	1	1	1	1	2	1	2	6	6	5	7	6	6	0	0	0	8	17.5	17.5	65.134	0	NaN
CAT	Catalase	P04040	P04040	0.458374	0.534515	0.633604	0.114122	0.268431	0.62121	0.327662	-0.192127	NaN	-0.684047	-0.66159	-0.449463	-0.803965	-1.14138	-0.39604	-0.545435	-0.285257	-0.321559	2.1386e-34	357420000	201570000	155840000	4	4	2	4	3	6	3	3	1	3	3	4	4	5	4	3	3	3	9	19	19	59.755	0	-0.266084
ANXA1	Annexin A1	P04083;Q5T3N1;Q5T3N0	P04083;Q5T3N1	-0.30185	-0.505238	-0.131607	-0.225148	-0.369398	0.193375	-0.0627007	NaN	-0.100329	0.238554	0.330438	0.340501	0.366192	0.232308	0.418737	0.134544	0.571392	0.580777	1.619e-255	1650800000	1086400000	564440000	6	3	2	4	4	4	4	1	5	8	7	10	10	8	9	1	2	4	13	46.2	46.2	38.714	0	0.0767018
NR3C1	Glucocorticoid receptor	P04150-9;P04150-2;P04150-8;P04150-10;P04150;P04150-7;P04150-5;P04150-6;P04150-3;D6RDA9;Q3MSN4;P08235-2;B0ZBF8;P08235-4;P08235;B0ZBF6	P04150-9;P04150-2;P04150-8;P04150-10;P04150;P04150-7;P04150-5;P04150-6;P04150-3	NaN	NaN	NaN	NaN	NaN	NaN	NaN	NaN	NaN	NaN	0.761166	0.310603	NaN	0.0719422	NaN	NaN	NaN	NaN	1.334e-13	72323000	50095000	22228000	0	0	0	0	0	0	0	0	0	0	2	2	1	2	2	0	0	0	4	7.4	7.4	78.695	NaN	NaN
OAT	Ornithine aminotransferase, mitochondrial;Ornithine aminotransferase, hepatic form;Ornithine aminotransferase, renal form	P04181;P04181-2	P04181;P04181-2	NaN	NaN	NaN	NaN	NaN	NaN	NaN	NaN	NaN	-0.608173	NaN	-0.271345	-0.399729	NaN	-0.413086	NaN	NaN	NaN	2.6988e-14	130930000	81283000	49648000	0	0	0	0	0	0	1	0	0	3	1	3	2	1	2	0	0	0	5	14.4	14.4	48.534	NaN	NaN
TK1	Thymidine kinase, cytosolic;Thymidine kinase	P04183;K7ERV3;K7ES52;K7ERJ1;K7ENW5	P04183;K7ERV3;K7ES52;K7ERJ1	0.0121706	0.0440681	0.181863	-0.339483	-0.188496	-0.236614	-0.171657	-0.250844	0.0491944	0.585998	0.756125	0.722245	0.405467	0.766876	0.483312	0.0516414	0.30207	0.123574	3.0949e-90	1936200000	1332900000	603270000	7	6	7	7	6	8	7	5	6	10	9	10	7	8	9	4	2	2	13	61.5	61.5	25.468	0	-0.280682
GAPDH	Glyceraldehyde-3-phosphate dehydrogenase	P04406;P04406-2;E7EUT5;O14556	P04406;P04406-2;E7EUT5	-0.353909	-0.322407	-0.361232	-0.0186718	-0.240358	-0.0761093	-0.0094839	0.0639971	-0.154	-0.355967	-0.261443	-0.364708	-0.214014	-0.294583	-0.196654	-0.280509	-0.0585352	-0.124364	0	8496700000	5104600000	3392100000	13	10	8	9	10	10	11	7	10	11	13	13	12	11	12	10	7	12	14	52.5	52.5	36.053	0	0.2778
HSPB1	Heat shock protein beta-1	P04792;F8WE04;C9J3N8	P04792	-0.311599	-0.457493	-0.251022	-0.705507	-0.481788	-0.42039	-0.356655	-0.446621	-0.0414178	-0.00470678	0.0841933	0.00390822	0.328884	0.159529	0.15913	-0.318475	-0.256242	-0.225408	3.9774e-152	4224100000	2660400000	1563600000	7	8	7	4	7	8	5	7	5	6	6	8	7	6	6	6	4	7	13	81.5	81.5	22.782	0	-0.170189
TYMS	Thymidylate synthase	P04818;P04818-2;P04818-3	P04818;P04818-2;P04818-3	-0.0238577	0.0379355	0.00478486	-2.17417	-1.68177	-1.94466	-2.37083	-1.97299	-0.801141	0.196564	0.232725	0.328559	-0.225629	-0.0596409	-0.138679	0.344627	0.167421	0.228563	0	4272800000	2551000000	1721700000	13	13	13	9	11	10	11	7	10	9	8	9	7	5	8	8	8	10	14	49.2	49.2	35.716	0	-1.94944
RPN1	Dolichyl-diphosphooligosaccharide--protein glycosyltransferase subunit 1	P04843;B7Z4L4;F8WF32	P04843;B7Z4L4	NaN	-0.880575	NaN	NaN	NaN	-0.602745	NaN	NaN	NaN	NaN	NaN	0.0492524	0.185223	NaN	0.60722	NaN	NaN	NaN	1.5586e-29	194030000	123120000	70904000	1	2	0	1	1	3	1	0	1	1	1	5	2	1	2	1	1	1	6	12.5	12.5	68.569	0	0.27783
GNAI2;GNAI1;GNAI3	Guanine nucleotide-binding protein G(i) subunit alpha-2;Guanine nucleotide-binding protein G(i) subunit alpha-1;Guanine nucleotide-binding protein G(k) subunit alpha	P04899;P04899-4;P04899-6;P04899-3;P04899-5;P04899-2;P63096;P08754;P63096-2;P09471-2;P09471;A0A087WTB6;A2A2R6;Q5JWD1;H0Y7E8;H3BTM2;A0A087WZE5;C9JPP4;Q5JWE9;H0Y7F4;P11488;P19087;A8MTJ3;P38405;P38405-2	P04899;P04899-4;P04899-6;P04899-3;P04899-5;P04899-2;P63096;P08754	NaN	NaN	NaN	0.0578849	NaN	NaN	-0.226089	NaN	NaN	-0.242761	-0.209824	-0.261633	0.0983925	0.110722	-0.119231	NaN	NaN	NaN	1.8819e-32	404700000	241440000	163270000	0	1	1	3	1	1	2	1	1	3	4	5	7	3	5	0	1	0	7	27.3	27.3	40.45	NaN	NaN
ATP1A1	Sodium/potassium-transporting ATPase subunit alpha-1	P05023-3;P05023-4;P05023;P05023-2;M0R116;B1AKY9;P13637;P50993;P13637-2;P13637-3;A0A0A0MT26;H0Y7C1;Q13733;M0QXF2;P20648;Q5TC01;E9PRA5	P05023-3;P05023-4;P05023;P05023-2	-0.311844	-0.447021	-0.262861	-0.224312	-0.200065	-0.141747	-0.101698	-0.0963442	-0.0187998	-0.0178959	-0.286208	-0.222229	NaN	-0.246792	-0.510945	-0.955309	0.207701	NaN	2.249e-48	644870000	376590000	268290000	5	6	8	5	6	5	6	6	4	3	4	6	1	6	3	2	3	1	11	15.2	15.2	109.55	0	0.111779
SLC25A5	ADP/ATP translocase 2;ADP/ATP translocase 2, N-terminally processed	P05141	P05141	-0.279947	-0.102037	-0.22359	0.0552914	0.0440889	0.0693933	0.132127	0.13965	0.0320583	-0.254481	-0.122953	-0.258787	-0.277851	-0.239061	-0.273463	0.00976399	0.0990108	0.125746	6.9222e-53	2709200000	1677900000	1031300000	9	11	9	11	10	11	11	9	9	8	9	11	10	9	9	2	4	4	4	37.9	37.9	32.852	0	0.278882
PCCA	Propionyl-CoA carboxylase alpha chain, mitochondrial	P05165;P05165-2;P05165-3;H0Y5U0;Q5JTW6;H0Y4B9;H0Y798;Q5JVH2	P05165;P05165-2;P05165-3	0.673172	0.700905	0.639602	0.873163	0.816693	0.781551	0.986917	0.915485	0.799794	0.602364	0.666269	0.674662	0.658086	0.640123	0.675202	0.595379	0.791907	0.600541	0	21436000000	15651000000	5785000000	34	25	26	32	25	28	32	23	30	22	19	23	25	22	25	24	20	24	38	63.9	63.9	80.058	0	0.143521
EIF2S1	Eukaryotic translation initiation factor 2 subunit 1	P05198;H0YJS4;G3V4T5	P05198;H0YJS4;G3V4T5	NaN	NaN	NaN	NaN	NaN	NaN	NaN	NaN	NaN	0.158298	0.125113	-0.0161965	-0.0869858	NaN	0.145081	NaN	NaN	NaN	1.6514e-21	104850000	65863000	38983000	0	0	1	0	0	0	0	0	0	2	2	4	3	1	2	1	0	0	4	14.3	14.3	36.112	NaN	NaN
RPLP0;RPLP0P6	60S acidic ribosomal protein P0;60S acidic ribosomal protein P0-like	P05388;F8VU65;P05388-2;F8VWS0;Q8NHW5;F8VPE8;G3V210;F8VW21;F8VQY6;F8VRK7;F8VS58;F8VZS0;F8W1K8;F8VWV4	P05388;F8VU65;P05388-2;F8VWS0;Q8NHW5;F8VPE8;G3V210;F8VW21;F8VQY6;F8VRK7	NaN	NaN	NaN	NaN	NaN	NaN	NaN	NaN	NaN	-0.122674	0.00174525	-0.039801	-0.28481	0.57576	-0.186183	NaN	NaN	NaN	9.525e-39	324590000	200740000	123860000	1	0	1	0	1	1	1	0	1	2	2	4	4	2	2	1	1	0	6	31.2	31.2	34.273	NaN	NaN
RB1	Retinoblastoma-associated protein	P06400	P06400	-0.116821	0.155039	0.154203	-0.0868745	0.192911	0.204483	NaN	NaN	0.0908645	-0.391118	-0.257456	-0.131654	-0.839395	-0.87696	-0.303158	NaN	NaN	NaN	3.1885e-14	135600000	78473000	57129000	2	3	3	2	3	2	0	1	4	2	2	3	3	4	2	0	1	1	6	5.6	5.6	106.16	0	0.0387082
ENO1	Alpha-enolase	P06733;P06733-2;K7EM90;F5H0C8;P13929-3;P09104-2;P13929-2;P13929;P09104;F5H1C3;E5RI09;E5RG95;K7EPM1;K7EKN2;E5RGZ4	P06733;P06733-2	-0.213298	-0.307386	-0.28482	0.0147288	-0.108284	-0.0564134	0.0206836	0.0443825	0.0184528	0.0175807	-0.0227843	0.0214157	-0.0640816	-0.1203	-0.0636716	0.139039	-0.0136451	0.0171773	0	8308900000	5236100000	3072900000	14	10	10	11	11	13	10	10	10	13	14	16	13	12	15	9	5	9	17	53.2	53.2	47.168	0	0.228406
NPM1	Nucleophosmin	P06748-2;P06748;P06748-3;E5RI98;E5RGW4	P06748-2;P06748;P06748-3;E5RI98	-0.308037	-0.455321	-0.567319	-0.198152	-0.387368	-0.45094	-0.485441	-0.382799	-0.281119	-0.183399	-0.320251	-0.311923	-0.470645	-0.498391	-0.429205	0.164982	-0.10515	-0.0331155	5.4598e-44	939570000	541420000	398140000	4	2	3	4	4	4	3	3	3	4	2	5	4	2	4	3	2	5	6	32.5	32.5	29.464	0	0.0679535
LDHB	L-lactate dehydrogenase B chain;L-lactate dehydrogenase	P07195;A8MW50;C9J7H8;F5H793;F5H5G7;F5H155;A0A087WUM2;G3XAP5;F5H245;Q6ZMR3;P07864	P07195;A8MW50;C9J7H8;F5H793	-0.249788	-0.169076	-0.180846	0.0442743	-0.0134097	-0.0457747	0.0760616	0.108409	0.0335012	-0.0921074	-0.0176485	0.029121	-0.11716	-0.0916903	-0.0576861	-0.0561836	0.0913212	0.078859	2.598e-194	7018000000	4170200000	2847800000	10	9	10	10	10	10	10	9	12	11	11	13	13	12	11	8	5	8	14	46.1	46.1	36.638	0	0.167436
P4HB	Protein disulfide-isomerase	P07237;H7BZ94;H0Y3Z3;I3L398;I3L312;I3NI03;I3L4M2;I3L0S0;I3L3U6;I3L3P5;I3L514;I3L1Y5	P07237;H7BZ94;H0Y3Z3	0.409668	0.412589	0.382879	0.224863	0.374837	0.365324	0.340189	0.329041	0.427837	0.260153	0.216337	0.180475	-0.162021	-0.195965	-0.243255	-0.0406212	-0.0588858	-0.0425979	0	88463000000	58610000000	29853000000	29	29	28	30	30	30	29	31	28	27	26	26	27	25	25	28	23	23	33	62.2	62.2	57.116	0	-0.0443435
ANXA2;ANXA2P2	Annexin A2;Annexin;Putative annexin A2-like protein	P07355;P07355-2;H0YN42;H0YMD0;H0YMU9;A6NMY6;H0YM50;H0YKS4;H0YNP5;H0YN28;H0YL33;H0YMM1;H0YNA0;H0YKZ7;H0YLV6;H0YMT9;H0YKX9;H0YKL9;H0YMW4;H0YN52;H0YKV8;H0YMD9;H0YNB8;H0YKN4;H0YLE2	P07355;P07355-2;H0YN42;H0YMD0;H0YMU9;A6NMY6;H0YM50;H0YKS4;H0YNP5;H0YN28;H0YL33	-0.572771	-0.631642	-0.702262	-0.547168	-0.66606	-0.591404	-0.400243	-0.425859	-0.519636	0.281618	0.298566	0.302205	0.299971	0.255514	0.403542	-0.0581484	0.00922671	-0.00517878	0	22114000000	14443000000	7671200000	20	20	18	19	17	20	22	18	19	19	21	22	21	21	22	18	14	13	28	69.3	69.3	38.604	0	0.040238
TUBB	Tubulin beta chain	Q5JP53;P07437;Q5ST81;I3L2F9;A6NNZ2;Q9H4B7;CON__ENSEMBL:ENSBTAP00000025008	Q5JP53;P07437;Q5ST81	-0.31547	-0.256284	-0.382012	-0.134937	-0.124692	-0.163163	0.18638	0.0398821	-0.17229	0.0352633	0.12374	0.00607522	0.253526	0.28276	0.184126	-0.141474	-0.0667039	-0.210718	0	7430700000	4656900000	2773800000	5	5	5	5	5	5	4	4	5	5	5	5	5	5	5	5	3	5	4	63.8	20.2	47.766	0	0.180533
EPRS	Bifunctional glutamate/proline--tRNA ligase;Glutamate--tRNA ligase;Proline--tRNA ligase	P07814;V9GYZ6;V9GZ76	P07814;V9GYZ6	-0.37167	-0.240604	0.0176537	-0.204079	NaN	0.172171	NaN	-0.059817	-0.106646	0.359077	0.354054	0.106423	0.151903	0.315922	0.101576	NaN	NaN	NaN	3.3804e-68	601670000	391700000	209970000	3	3	2	3	1	3	1	5	5	9	7	11	8	7	7	1	0	0	17	13.7	13.7	170.59	0	0.22465
HSP90AA1	Heat shock protein HSP 90-alpha	P07900;P07900-2;G3V2J8;Q14568;Q58FG0;Q58FG1	P07900;P07900-2	0.0215056	-0.0968748	-0.0243516	0.222281	-0.0658878	0.0807865	0.184666	0.053455	0.138456	0.0992005	0.179245	0.173386	0.195344	0.188025	0.201115	-0.0286476	-0.0857009	0.00703734	0	4057000000	2643400000	1413600000	15	9	8	13	9	10	11	9	11	14	9	15	14	13	13	10	8	10	20	49.3	33.9	84.659	0	0.105138
ANXA6	Annexin A6;Annexin	P08133;P08133-2;E7EMC6;E5RK69;E5RFF0;E5RIU8;E5RJR0;E5RI05;E5RJF5;E5RK63;H0YC77	P08133;P08133-2;E7EMC6;E5RK69	-0.0344215	NaN	-0.196002	0.100111	NaN	1.16403	0.307353	-0.115847	NaN	0.0524311	0.067825	0.149006	0.154852	-0.00826812	0.133224	NaN	NaN	NaN	2.4576e-111	795730000	506940000	288790000	5	1	3	4	0	3	2	2	1	8	5	12	10	6	10	1	0	1	15	28.1	28.1	75.872	0	0.747283
HSP90AB1	Heat shock protein HSP 90-beta	P08238;Q58FF7	P08238	-0.0044996	-0.0536542	-0.053354	0.0952139	0.105487	0.0921324	0.19323	0.180028	0.165257	0.0527456	0.142308	0.147045	0.209517	0.261598	0.199201	-0.00184134	0.0180775	0.0982698	0	32594000000	21385000000	11209000000	28	31	26	29	29	30	32	24	32	25	24	31	29	27	27	24	17	19	22	54	54	83.263	0	0.148568
SRPR	Signal recognition particle receptor subunit alpha	P08240-2;P08240	P08240-2;P08240	NaN	NaN	NaN	NaN	NaN	NaN	NaN	NaN	NaN	-0.126267	-0.323545	0.305224	NaN	0.373267	NaN	NaN	NaN	NaN	2.0217e-09	34686000	23142000	11544000	0	0	0	0	0	0	0	0	0	2	2	2	0	2	0	0	0	0	2	4.9	4.9	66.558	NaN	NaN
ASNS	Asparagine synthetase [glutamine-hydrolyzing]	P08243-2;P08243;P08243-3;F8WEJ5;C9J057;C9JT45;C9JM09;C9JLN6	P08243-2;P08243;P08243-3;F8WEJ5	0.389823	0.29306	0.291859	0.279983	0.409509	0.381749	0.347901	0.298554	0.412894	0.758329	0.78522	0.634767	0.657528	0.88671	0.589638	-0.133018	0.160632	0.0173627	4.9342e-64	2632900000	1715900000	917020000	10	7	7	9	6	9	8	5	7	9	9	12	12	10	11	8	4	4	16	35.2	35.2	62.168	0	0.0886897
SNRNP70	U1 small nuclear ribonucleoprotein 70 kDa	P08621;P08621-2;P08621-3;P08621-4;M0QYR1	P08621;P08621-2;P08621-3;P08621-4	0.0335792	0.0637016	-0.258465	0.07712	-0.0558939	-0.0746113	0.0667077	0.0933913	0.0367227	-0.21248	-0.467342	-0.600267	-0.514709	-0.686381	-0.367435	0.167017	-0.435743	-0.174076	8.8453e-177	5452400000	3224400000	2228000000	10	10	9	9	10	12	11	6	11	11	10	9	11	9	11	12	11	10	16	41.9	41.9	51.556	0	-0.0894732
ANXA5	Annexin A5;Annexin	P08758;D6RBL5;D6RBE9;E9PHT9;D6RCN3	P08758;D6RBL5;D6RBE9	-0.627843	-0.543079	-0.515929	-0.436954	-0.394015	-0.31834	-0.20667	-0.336092	-0.315054	-0.174156	-0.134408	-0.113466	-0.140153	-0.192002	-0.139304	-0.189247	NaN	-0.239969	0	3521300000	2141200000	1380100000	4	2	3	4	4	4	6	2	4	11	11	15	11	10	10	5	1	6	17	58.4	58.4	35.936	0	0.149064
ACAA1	3-ketoacyl-CoA thiolase, peroxisomal	P09110;C9JDE9;H7C131;P09110-2;H0Y4D4;B4DVF4;F2Z2Q6;F2Z3P7	P09110;C9JDE9;H7C131;P09110-2;H0Y4D4	0.542047	0.490609	0.465031	0.174379	0.13856	0.154986	-1.64287	-1.70501	-1.79643	-6.47079	-4.28627	-4.69307	-5.3937	-4.40931	-5.4084	-0.244121	-0.0615034	-0.0954139	0	23252000000	10730000000	12523000000	20	19	18	17	18	18	16	13	14	13	13	14	16	14	17	17	19	18	22	66.5	66.5	44.292	0	-0.335623
GSTP1	Glutathione S-transferase P	P09211;A8MX94;A0A087X2E9;A0A087X243	P09211;A8MX94	NaN	NaN	NaN	0.485303	NaN	NaN	NaN	NaN	NaN	0.0994441	0.377465	0.164465	0.149286	NaN	0.154471	-4.60466	NaN	NaN	7.0565e-55	799000000	237390000	561610000	2	1	2	2	1	1	0	0	0	5	3	3	4	1	4	2	0	0	5	31.9	31.9	23.356	NaN	NaN
LGALS1	Galectin-1	P09382;F8WEI7	P09382	-0.314246	-0.328353	-0.344159	-0.700105	-0.657606	-0.619969	-0.698609	-0.633007	-0.362792	0.166188	0.143753	0.0804127	0.302658	0.344134	0.301142	-0.128153	-0.206139	-0.165933	3.0257e-292	9933200000	6300100000	3633100000	7	6	7	7	7	7	7	6	7	7	6	7	6	6	6	8	6	7	8	83.7	83.7	14.716	0	-0.329253
HMGB1	High mobility group protein B1	P09429;Q5T7C4;B2RPK0	P09429;Q5T7C4	-0.0594465	NaN	0	0.271983	0.236433	NaN	0.293807	NaN	0.252454	0.074322	-0.0814053	0.153455	0.00461886	0.175297	0.0679141	NaN	NaN	NaN	3.4449e-87	1221900000	782910000	439000000	2	1	2	2	2	1	2	1	3	3	5	6	4	4	5	1	0	1	4	32.1	32.1	24.893	0	0.283932
PARP1	Poly [ADP-ribose] polymerase 1	P09874	P09874	NaN	NaN	NaN	NaN	NaN	NaN	NaN	NaN	NaN	-0.276556	-0.275761	-0.0448797	-0.0870412	-0.222574	-0.207049	NaN	NaN	NaN	7.5365e-38	226220000	137000000	89225000	1	1	1	0	0	0	0	0	0	3	4	5	4	3	4	0	0	0	6	8.2	8.2	113.08	NaN	NaN
ALDOC	Fructose-bisphosphate aldolase C;Fructose-bisphosphate aldolase	P09972;K7EKH5;C9J8F3;J3KSV6;J3QKP5;A8MVZ9	P09972;K7EKH5;C9J8F3;J3KSV6;J3QKP5;A8MVZ9	NaN	NaN	NaN	NaN	NaN	NaN	NaN	NaN	NaN	NaN	0.0288972	-0.0300489	NaN	NaN	-0.208332	NaN	NaN	NaN	8.2017e-42	296100000	175980000	120120000	0	0	0	0	0	0	0	0	0	1	1	1	0	1	1	0	0	0	1	8.2	6.3	39.455	NaN	NaN
DLAT	Dihydrolipoyllysine-residue acetyltransferase component of pyruvate dehydrogenase complex, mitochondrial	P10515;H0YDD4;E9PEJ4	P10515;H0YDD4;E9PEJ4	NaN	NaN	NaN	NaN	0.200116	0.484322	0.831022	0.470085	0.178963	NaN	NaN	NaN	NaN	0.0256557	NaN	NaN	NaN	NaN	7.4181e-26	188820000	140870000	47949000	1	1	1	1	2	5	5	4	3	2	0	2	1	3	1	1	0	1	10	15.9	15.9	68.996	NaN	NaN
TXN	Thioredoxin	P10599;P10599-2	P10599;P10599-2	-0.640127	-0.723523	-0.131076	-2.55687	-1.95668	-1.98181	-2.6	-2.26243	-1.32829	-1.3067	-1.28557	-1.27915	-2.46042	-2.48983	-2.55914	0.243038	0.186515	0.157583	2.103e-58	7524700000	3369600000	4155000000	7	6	7	6	6	7	6	6	7	5	5	6	5	6	4	6	5	6	7	51.4	51.4	11.737	0	-1.34169
ESD	S-formylglutathione hydrolase	P10768;H7BZT7;X6RA14;U3KQT1	P10768;H7BZT7;X6RA14	NaN	NaN	NaN	NaN	NaN	NaN	NaN	-0.161012	NaN	0.0262275	0.00123602	-0.0369127	0.0411756	-0.132883	NaN	NaN	NaN	NaN	1.9219e-13	177670000	107670000	69996000	1	1	1	1	0	1	1	2	1	2	2	3	2	3	1	0	1	1	3	16.3	16.3	31.462	NaN	NaN
HSPD1	60 kDa heat shock protein, mitochondrial	P10809;E7ESH4;E7EXB4;P10809-2;C9JL25;C9JL19;C9JCQ4;C9J0S9	P10809	0.283817	0.0871333	0.198457	0.329616	0.298302	0.219829	0.320174	0.305645	0.431438	-0.0860251	-0.0162598	-0.0759194	-0.0534718	-0.20841	-0.0883388	0.174243	0.10339	0.187033	3.1493e-225	4910300000	3518100000	1392200000	10	6	9	10	8	8	9	7	11	10	10	14	10	8	9	8	5	7	21	46.2	46.2	61.054	0	0.0998443
HSPA5	78 kDa glucose-regulated protein	P11021	P11021	-0.169945	0.0357599	-0.337703	0.225944	0.00371396	0.116525	0.365543	0.631185	0.129203	-0.0316085	0.11734	0.0590856	0.0294884	-0.0345206	0.103905	NaN	NaN	0.477539	1.1702e-210	1582200000	1001800000	580400000	2	2	2	3	2	4	5	2	4	11	11	14	9	5	10	2	1	2	16	34.9	34.9	72.332	0	0.286471
HSPA8	Heat shock cognate 71 kDa protein	P11142;E9PKE3;P11142-2;E9PN89;E9PNE6;E9PLF4;A8K7Q2;E9PQQ4;E9PQK7;E9PK54;E9PI65;E9PPY6;P54652;E9PN25;E9PS65;E9PM13	P11142;E9PKE3;P11142-2;E9PN89;E9PNE6	-0.0649588	-0.14546	-0.107678	-0.0498769	-0.0490596	-0.0967983	0.0338358	-0.00982909	-0.0281375	-0.104619	-0.0360292	-0.0503928	-0.114195	-0.104293	-0.118475	0.100933	0.0646922	0.1387	0	10913000000	6660000000	4253400000	23	15	19	19	16	18	19	13	19	21	17	21	21	18	19	15	12	10	20	40.6	40.6	70.897	0	0.0578016
G6PD	Glucose-6-phosphate 1-dehydrogenase	P11413;P11413-2;P11413-3;E9PD92	P11413;P11413-2;P11413-3;E9PD92	1.47673	1.61694	1.41396	1.52142	1.63947	1.69636	1.70194	1.39606	1.63842	0.402042	0.447193	0.398584	0.432733	0.488559	0.51207	0.16411	0.0728509	-0.0773135	4.25e-176	5085600000	3716400000	1369200000	19	13	13	17	14	16	16	9	16	19	16	21	22	16	21	10	6	7	10	56.7	56.7	59.256	0	0.162735
PC	Pyruvate carboxylase, mitochondrial	P11498;P11498-2;E9PRE7;E9PS68	P11498	-0.0348973	0.000558919	-0.0411744	0.187289	0.0574292	0.0652726	0.276217	0.249087	0.0946559	0.343377	0.385449	0.421121	0.387699	0.302429	0.367468	0.0418576	0.181828	0.0673655	0	51362000000	34521000000	16841000000	47	45	43	46	42	44	42	41	44	40	35	37	39	38	39	40	39	43	53	60.9	60.9	129.63	0	0.10017
MTHFD1	C-1-tetrahydrofolate synthase, cytoplasmic;Methylenetetrahydrofolate dehydrogenase;Methenyltetrahydrofolate cyclohydrolase;Formyltetrahydrofolate synthetase;C-1-tetrahydrofolate synthase, cytoplasmic, N-terminally processed	P11586;F5H2F4;V9GYY3	P11586;F5H2F4	0.0146603	0.179074	NaN	0.23457	0.210322	NaN	0.0417899	0.0772232	0.779628	0.383528	0.246913	0.241824	0.284275	0.26445	0.314731	NaN	NaN	NaN	1.1943e-74	1406900000	502760000	904140000	4	2	0	2	2	1	3	3	2	8	7	14	9	10	8	0	0	1	15	18.3	18.3	101.56	0	0.125579
PCNA	Proliferating cell nuclear antigen	P12004	P12004	NaN	NaN	NaN	NaN	NaN	NaN	NaN	NaN	NaN	-0.454309	-0.0735306	0.060089	-0.143065	0.0205158	NaN	NaN	NaN	NaN	1.0412e-09	120910000	72080000	48831000	0	0	1	0	0	0	0	0	0	1	2	4	1	2	1	0	0	0	4	14.6	14.6	28.768	NaN	NaN
SLC25A6;SLC25A4	ADP/ATP translocase 3;ADP/ATP translocase 1	P12236;P12235;V9GYG0;Q9H0C2	P12236;P12235	NaN	NaN	NaN	NaN	NaN	NaN	NaN	NaN	NaN	0.336404	NaN	0.507624	0.349763	NaN	0.141254	NaN	NaN	NaN	7.4434e-45	135230000	82462000	52765000	0	1	1	1	0	0	0	0	0	2	1	2	2	1	2	0	0	1	2	34.6	8.1	32.866	NaN	NaN
CKB	Creatine kinase B-type	P12277;G3V461;G3V4N7;H0YJG0	P12277;G3V461;G3V4N7	-1.02519	NaN	NaN	NaN	-0.236079	-0.491515	-0.211254	NaN	-0.209943	-0.495385	-0.507618	-0.624654	-0.481218	-0.713098	-0.345244	NaN	NaN	NaN	1.1954e-15	249940000	136490000	113450000	2	0	0	1	2	2	3	0	2	2	2	2	4	3	4	1	0	1	4	11	11	42.644	0	0.661393
ACTN1	Alpha-actinin-1	P12814-2;P12814;P12814-3;P12814-4;H9KV75;G3V2N5;P35609-2;P35609;G3V2W4;H7C5W8;Q08043;H0YJW3;G3V2X9;H0YJ11;A0A087WSZ2;G3V5M4;F6THM6;G3V2E8;K7EP19;G3V380;D6RH00	P12814-2;P12814;P12814-3;P12814-4;H9KV75	-0.669562	-1.06534	-0.962542	-0.674578	-0.639308	-0.724777	-0.380949	-0.808197	-0.328688	-0.0753191	-0.123108	-0.228949	-0.122557	-0.23885	-0.266135	0.0156018	NaN	0.196975	4.1034e-231	2386400000	1440800000	945550000	7	3	4	7	4	7	6	4	8	15	13	16	15	13	15	7	1	6	10	31.1	31.1	102.71	0	0.287965
XRCC6	X-ray repair cross-complementing protein 6	P12956;B1AHC9;P12956-2	P12956;B1AHC9;P12956-2	-0.232968	-0.0966605	-0.297706	0.0435853	-0.148748	-0.0845278	0.0441433	NaN	0.153313	-0.0901856	-0.144152	-0.0441733	-0.193158	-0.112037	-0.0227534	-0.342129	-0.118514	0.105645	5.0875e-150	1500000000	1003600000	496410000	7	3	2	6	4	3	3	1	2	8	7	16	9	8	10	2	2	4	18	37.8	37.8	69.842	0	0.14844
XRCC5	X-ray repair cross-complementing protein 5	P13010;C9JZ81;H7C0H9	P13010	-0.300639	-0.590516	-0.246899	-0.30248	0.136376	0.110339	0.0418141	-0.349356	-0.169706	-0.0618966	-0.163315	-0.0886745	-0.134526	-0.0536613	-0.000714153	-0.601897	NaN	NaN	6.5029e-129	1166700000	640620000	526110000	4	3	5	5	3	4	5	4	2	8	7	11	10	9	9	2	1	1	15	22.5	22.5	82.704	0	0.410978
IFI30	Gamma-interferon-inducible lysosomal thiol reductase	P13284	P13284	NaN	NaN	NaN	NaN	2.24141	2.00899	NaN	NaN	1.45131	NaN	NaN	NaN	NaN	NaN	NaN	NaN	NaN	NaN	2.7932e-16	137350000	122160000	15195000	1	1	0	0	2	2	0	0	2	1	0	1	0	0	0	0	0	0	2	14.8	14.8	27.963	NaN	NaN
EEF2	Elongation factor 2	P13639;K7EJ74;K7EP67	P13639	0.0421445	0.152616	0.0316394	0.170815	0.175334	0.163307	0.232231	0.240093	0.211017	0.193122	0.219295	0.191486	0.342234	0.392331	0.342468	0.127293	0.089171	0.128047	0	21696000000	14391000000	7305000000	33	31	27	31	31	29	33	26	30	35	30	35	33	30	33	23	22	25	40	56.9	56.9	95.337	0	0.128671
PDIA4	Protein disulfide-isomerase A4	P13667;C9JMN9	P13667	0.968436	0.82797	0.726764	0.840663	0.945619	0.936438	1.00836	0.861773	0.95764	0.527054	0.536851	0.517982	0.336046	0.260174	0.218799	-0.140299	-0.156104	-0.0842008	0	27732000000	19577000000	8155400000	29	30	28	31	31	30	30	29	30	28	28	28	28	26	26	30	24	24	40	56.3	56.3	72.932	0	0.108468
PKM	Pyruvate kinase PKM;Pyruvate kinase	P14618;P14618-3;P14618-2;B4DNK4;H3BTN5;H3BR70;H3BQ34;H3BUW1;H3BTJ2;H3BT25;H3BU13;H3BN34;H3BQZ3;P30613-2;P30613	P14618;P14618-3;P14618-2;B4DNK4;H3BTN5;H3BR70	-0.363598	-0.420415	-0.397717	-0.217474	-0.28001	-0.284326	-0.107503	-0.101714	-0.188419	-0.0592553	0.0525697	0.0131997	-0.04527	0.0629348	-0.0955113	0.101828	0.112492	0.082371	0	30664000000	19357000000	11307000000	28	23	24	27	27	29	28	21	24	25	24	27	28	23	28	24	18	23	34	71.8	71.8	57.936	0	0.117707
HSP90B1	Endoplasmin	P14625;Q96GW1;F8W026;H0YIV0;Q58FF3	P14625	-0.488768	-0.59103	-1.02063	NaN	NaN	-0.432404	-0.362199	NaN	NaN	-0.0774044	-0.240414	-0.0269367	-0.130467	-0.168315	-0.10447	0.0100829	NaN	NaN	1.9706e-135	1472500000	905740000	566800000	2	2	2	1	1	2	2	0	1	9	10	14	6	8	9	2	0	0	14	21.2	19.4	92.468	0	0.158626
IDE	Insulin-degrading enzyme	P14735;P14735-2;Q5T5N3	P14735;P14735-2	NaN	NaN	NaN	NaN	NaN	NaN	NaN	NaN	NaN	NaN	NaN	0.486911	NaN	0.608214	0.366206	NaN	NaN	NaN	1.8961e-17	89741000	63644000	26097000	0	0	0	0	0	1	1	1	1	1	1	2	1	2	4	0	0	0	5	5.7	5.7	117.97	NaN	NaN
HNRNPL	Heterogeneous nuclear ribonucleoprotein L	P14866;M0QXS5;P14866-2;M0QYT0;M0R076;M0QYL7;M0R1W6	P14866;M0QXS5;P14866-2;M0QYT0	0.0645153	0.0472922	-0.324999	0.474654	-0.0929803	-0.238786	0.106038	NaN	-0.0873331	-0.780094	-1.10365	-1.2632	NaN	-1.01865	-0.998121	-0.570311	NaN	-0.380247	2.2632e-35	365920000	193560000	172370000	2	2	2	3	2	4	2	1	3	5	3	6	0	6	5	2	0	2	9	21.9	21.9	64.132	0	-0.140272
DARS	Aspartate--tRNA ligase, cytoplasmic	P14868;P14868-2;C9J7S3;C9JLC1;C9JQM9;H7C278;H7BZ35	P14868;P14868-2	NaN	NaN	NaN	NaN	NaN	NaN	NaN	NaN	NaN	0.306874	0.206408	0.0145921	0.290497	0.322094	0.534078	NaN	NaN	NaN	3.4866e-30	169530000	112390000	57137000	1	0	0	0	0	0	0	0	0	3	2	7	3	2	2	0	0	0	7	15	15	57.136	NaN	NaN
GSPT2;GSPT1	Eukaryotic peptide chain release factor GTP-binding subunit ERF3B;Eukaryotic peptide chain release factor GTP-binding subunit ERF3A	Q8IYD1;P15170-2;P15170-3;H3BR35;P15170	Q8IYD1;P15170-2;P15170-3;H3BR35;P15170	NaN	NaN	NaN	NaN	NaN	NaN	NaN	NaN	NaN	0.541363	NaN	NaN	0.440831	0.650542	NaN	NaN	NaN	NaN	2.2485e-20	91178000	61903000	29275000	0	0	0	0	0	0	0	0	0	2	1	1	3	3	1	0	0	0	5	10.7	10.7	68.882	NaN	NaN
RPS2	40S ribosomal protein S2	P15880;H0YEN5;E9PQD7;I3L404;E9PMM9;E9PM36;E9PPT0;H3BNG3;H0YE27	P15880;H0YEN5;E9PQD7;I3L404;E9PMM9	-0.358453	-0.421657	-0.388951	-0.211225	-0.244438	-0.30707	-0.138386	-0.0431973	-0.187155	-0.22263	-0.261867	-0.24761	-0.313431	-0.260863	-0.285254	0.0748631	0.129316	0.116554	9.7693e-144	8462400000	5136600000	3325700000	11	9	9	11	9	12	13	10	11	11	10	11	13	12	9	10	9	11	17	55.3	55.3	31.324	0	0.144513
DSP	Desmoplakin	P15924;P15924-2;P15924-3	P15924;P15924-2;P15924-3	NaN	NaN	NaN	NaN	NaN	3.88037	NaN	NaN	NaN	2.24414	1.7007	NaN	1.23537	NaN	2.52827	NaN	NaN	NaN	1.7033e-71	144690000	135570000	9125000	1	1	0	0	0	3	2	1	2	4	3	0	18	1	3	0	0	0	24	9.8	9.8	331.77	NaN	NaN
HIST1H1C;HIST1H1E;HIST1H1D	Histone H1.2;Histone H1.4;Histone H1.3	P16403;P10412;P16402;P22492;Q02539	P16403;P10412;P16402	NaN	NaN	NaN	-0.201934	-0.487287	-0.544507	-0.548488	NaN	-0.374263	-1.13276	-0.994442	-1.15098	-1.04781	-1.31205	-1.30787	0.197296	0.25849	0.19108	1.3328e-44	1020200000	501200000	519050000	1	1	1	2	2	2	4	1	2	5	6	4	6	3	5	4	4	4	7	27.7	27.7	21.364	NaN	NaN
ATP2A2	Sarcoplasmic/endoplasmic reticulum calcium ATPase 2	P16615;P16615-5;P16615-2;P16615-3;P16615-4;H7C5W9;O14983-2;O14983;O14983-3;Q93084-4;Q93084-2;Q93084-3;Q93084-7;Q93084;Q93084-6;Q93084-5;H3BVB2;A0A0C4DH86;H3BTW4	P16615;P16615-5;P16615-2;P16615-3;P16615-4;H7C5W9	0.109142	-0.0150668	-0.0624733	-0.462329	-0.249689	-0.264754	-0.45095	-0.387554	-0.126297	-0.630008	-0.567725	-0.593437	-1.4447	-1.40475	-1.39524	-0.103203	-0.139052	-0.114475	0	11478000000	6161000000	5317100000	25	22	24	26	23	27	26	26	28	24	20	24	22	17	23	25	22	24	35	38.1	38.1	114.76	0	-0.249687
CAPN2	Calpain-2 catalytic subunit	P17655;P17655-2	P17655;P17655-2	NaN	NaN	NaN	-0.0902594	NaN	NaN	NaN	NaN	NaN	0.224313	NaN	0.0779115	0.0921906	-0.0053521	-0.0455377	NaN	NaN	NaN	9.1555e-27	421840000	263540000	158300000	1	1	1	3	0	0	2	0	1	2	1	4	5	4	4	0	0	0	6	10	10	79.994	NaN	NaN
CTPS1	CTP synthase 1	P17812;P17812-2	P17812;P17812-2	0.019251	0.140246	0.0200114	0.000745639	-0.165787	0.000659749	0.0187497	0.313628	0.141986	0.117946	0.144288	0.110659	0.125237	0.279066	0.14549	0.190249	-0.198331	NaN	7.5858e-119	1277300000	822060000	455260000	5	5	5	6	5	6	5	2	6	11	11	13	10	9	8	2	2	1	16	28.4	28.4	66.69	0	-0.0193517
TCP1	T-complex protein 1 subunit alpha	P17987;E7ERF2;E7EQR6;F5H282;F5GZ03;F5H136;F5GZI8;F5H676;F5H726;F5GYL4;F5H7Y1	P17987;E7ERF2;E7EQR6;F5H282	-0.155938	-0.32865	-0.402381	-0.323218	-0.266844	-0.262642	0.108194	-0.461211	-0.290711	-0.123509	-0.140948	-0.0966532	-0.0767393	-0.187301	0.00761139	-0.314082	-0.550127	-0.348056	1.9249e-112	1267400000	758650000	508740000	6	7	4	5	5	7	7	3	6	13	10	17	13	9	14	4	2	3	22	51.1	51.1	60.343	0	0.0618053
PTPN1	Tyrosine-protein phosphatase non-receptor type 1;Tyrosine-protein phosphatase non-receptor type	P18031;B4DSN5	P18031;B4DSN5	NaN	NaN	NaN	NaN	NaN	NaN	NaN	NaN	NaN	0.446878	0.270622	0.229997	0.34444	0.650715	0.433629	NaN	NaN	NaN	1.4457e-16	260400000	180250000	80152000	0	0	0	0	0	0	0	0	0	3	3	2	2	4	2	0	0	0	4	13.1	13.1	49.966	NaN	NaN
ARF4	ADP-ribosylation factor 4	P18085;C9JPM4;C9JAK5;U3KQF2;F5H1V1;F5H6T5;F8WDB3;F5H0C7	P18085;C9JPM4;C9JAK5;U3KQF2	NaN	NaN	NaN	NaN	NaN	NaN	NaN	NaN	NaN	0.163554	NaN	-0.141358	0.571542	NaN	0.0444006	NaN	NaN	NaN	1.8103e-20	137600000	88317000	49286000	0	0	1	0	0	0	0	0	1	2	1	5	4	2	3	0	0	0	4	25.6	25.6	20.511	NaN	NaN
RPL7	60S ribosomal protein L7	P18124;A8MUD9;C9JIJ5;C9JZ88	P18124;A8MUD9	-0.60856	-0.545104	-0.435024	-0.47548	-0.361585	-0.485817	-0.257892	-0.268569	-0.378496	-0.142407	-0.232043	-0.188835	-0.43499	-0.366689	-0.375267	-0.0224533	-0.0856807	0.0592047	4.5759e-107	2617100000	1534700000	1082400000	7	6	4	7	6	6	5	7	7	8	8	7	7	8	6	4	2	5	11	44.4	44.4	29.225	0	0.0696236
VCL	Vinculin	P18206-2;P18206;Q5JQ13;P18206-3	P18206-2;P18206;Q5JQ13	-0.0313857	NaN	NaN	NaN	NaN	NaN	NaN	NaN	NaN	0.169595	0.169023	0.331961	0.266158	0.169162	-0.0956104	NaN	NaN	NaN	2.8463e-76	473090000	297860000	175230000	3	1	0	0	0	0	1	1	1	5	5	12	5	6	8	0	1	1	13	13.7	13.7	116.72	0	NaN
PGAM1	Phosphoglycerate mutase 1	P18669;P15259;Q8N0Y7	P18669	-0.208299	NaN	NaN	-0.250632	-0.717869	-0.203629	-0.164509	-0.0696868	-0.395572	-0.0640498	-0.0848355	0.00432557	-0.221338	-0.112625	-0.162367	NaN	NaN	0.408878	8.153e-85	782920000	485650000	297280000	2	1	1	2	2	3	2	3	2	6	6	9	4	2	5	1	0	2	10	51.2	51.2	28.804	0	-0.0423335
NCL	Nucleolin	P19338;H7BY16	P19338;H7BY16	NaN	-0.280151	-0.284065	-0.107209	-2.85629	-0.413763	0.171185	-0.40138	-0.499865	-0.364414	-0.3005	-0.347715	-0.370667	-0.527925	-0.455929	NaN	-0.334044	NaN	8.3811e-142	1165700000	504600000	661090000	2	3	4	2	2	4	3	3	4	6	6	11	3	6	5	1	2	1	12	19.6	19.6	76.613	0	-0.131655
HK1	Hexokinase-1	P19367-4;P19367-2;P19367;P19367-3;E9PB90;P52789;B1AR62;B1AR61;B1AR63;Q2TB90-3;Q2TB90-2;Q2TB90;P52790	P19367-4;P19367-2;P19367;P19367-3	-1.48773	NaN	-0.710051	0.367224	NaN	NaN	NaN	NaN	NaN	0.0653036	-0.430932	0.358268	0.784462	NaN	0.0710505	NaN	NaN	NaN	3.7229e-23	199350000	107470000	91880000	2	0	2	2	0	1	1	0	1	2	2	3	2	2	5	0	0	0	7	7.6	7.6	101.08	0	1.46611
FLNA	Filamin-A	Q5HY54;Q60FE5;P21333-2;P21333;A0A087WWY3;F8WE98;H0Y5C6;H0Y5F3;H7C2E7	Q5HY54;Q60FE5;P21333-2;P21333;A0A087WWY3	-0.405605	-0.326412	-0.333141	-0.366416	-0.318778	-0.409191	-0.380876	-0.403707	-0.258355	0.130506	0.134416	0.0633478	0.23087	0.244961	0.216185	0.0668497	-0.0975586	-0.00875756	0	15608000000	9890600000	5717400000	48	43	44	50	37	44	43	35	45	50	48	52	47	49	51	37	30	33	70	42.5	42.5	276.55	0	-0.0332747
ACO1	Cytoplasmic aconitate hydratase	P21399	P21399	-1.61972	-1.97587	-1.64707	-2.21853	-1.98747	-1.88566	-1.8859	-1.87723	-1.50402	0.138301	0.195687	0.293664	-0.0314096	-0.111065	-0.135649	-1.8769	-1.64754	-1.75054	7.1896e-217	2098600000	1243000000	855610000	9	5	5	5	4	2	5	4	7	13	11	17	15	10	14	2	3	4	23	35	35	98.398	0	-0.340393
COMT	Catechol O-methyltransferase	P21964-2;P21964;E7EMS6;E7EUU8;F8WBW9;H7BZ45	P21964-2;P21964;E7EMS6;E7EUU8	0.175065	-0.0801917	0.035934	0.437658	0.121299	0.477677	0.34413	0.199113	0.344554	0.10023	0.0645025	0.0477187	-0.139029	-0.275323	-0.110682	-0.197255	-0.29961	-0.388407	2.3412e-172	3941400000	2576000000	1365500000	10	8	7	11	10	11	10	3	7	10	6	9	8	8	11	6	4	6	14	76	76	24.449	0	0.401724
GART	Trifunctional purine biosynthetic protein adenosine-3;Phosphoribosylamine--glycine ligase;Phosphoribosylformylglycinamidine cyclo-ligase;Phosphoribosylglycinamide formyltransferase	P22102;P22102-2;C9JBJ1;C9JTV6;F8WD69;C9JZG2;C9JKQ7;H7C366	P22102;P22102-2	-0.197266	0.245333	0.0422895	0.0331566	0.270392	0.0165634	0.128853	0.214711	NaN	0.184538	0.304208	0.217267	0.47352	0.379726	0.448893	NaN	NaN	NaN	7.871e-53	16930000000	360780000	16569000000	4	3	3	3	2	3	4	3	1	5	4	9	9	7	7	0	0	0	13	18.3	18.3	107.77	0	-0.00913295
PAICS	Multifunctional protein ADE2;Phosphoribosylaminoimidazole-succinocarboxamide synthase;Phosphoribosylaminoimidazole carboxylase	P22234;E9PBS1;P22234-2;D6RF62	P22234;E9PBS1;P22234-2;D6RF62	NaN	-0.0109487	NaN	NaN	0.0846903	0.127535	0.094576	NaN	0.188877	0.490167	0.401359	0.324871	0.422902	0.430227	0.325198	-0.207264	NaN	-0.0915066	8.8128e-132	709880000	464180000	245700000	0	2	0	1	2	2	3	0	4	6	4	6	8	7	6	4	1	3	10	24.5	24.5	47.079	0	0.117061
SCP2	Non-specific lipid-transfer protein	P22307-7;P22307-8;P22307;P22307-3;E9PLD1;P22307-4;P22307-6;P22307-2;H0YCB0	P22307-7;P22307-8;P22307;P22307-3;E9PLD1;P22307-4	NaN	0.824413	NaN	NaN	0.317007	0.121555	NaN	NaN	NaN	-2.38692	NaN	-1.17974	NaN	-1.32601	NaN	NaN	NaN	NaN	6.7169e-12	99351000	54433000	44918000	1	2	1	1	2	2	1	0	1	2	1	2	1	2	1	1	1	1	4	8.3	8.3	54.415	0	-0.605132
UBA1	Ubiquitin-like modifier-activating enzyme 1	P22314-2;P22314;Q5JRR9;Q5JRS0;Q5JRR6;Q5JRS1;Q5JRS3;Q5JRS2	P22314-2;P22314	-0.335518	-0.143334	-0.166266	-0.0328893	0.0849536	0.0466598	0.26132	0.110332	0.0856166	0.0564463	0.0910663	0.183309	0.257783	0.261929	0.312463	-0.275785	NaN	-0.284127	5.9508e-239	2388500000	1470200000	918320000	10	7	7	9	4	9	8	5	7	16	12	19	15	10	15	2	0	3	24	33.6	33.6	113.8	0	0.212926
NME2;NME1-NME2;NME2P1	Nucleoside diphosphate kinase B;Nucleoside diphosphate kinase;Putative nucleoside diphosphate kinase	P22392-2;Q32Q12;P22392;O60361	P22392-2;Q32Q12;P22392;O60361	0.028104	NaN	NaN	NaN	NaN	0.0643525	-0.193549	-0.273977	-0.13788	0.212201	0.682041	0.358402	0.422586	NaN	0.0670826	0.298575	-0.18094	NaN	1.2954e-35	444160000	290210000	153950000	3	1	1	1	1	2	2	2	2	3	3	4	6	2	4	2	2	1	2	46.4	46.4	30.137	0	0.0362485
HNRNPA2B1	Heterogeneous nuclear ribonucleoproteins A2/B1	P22626-2;P22626;A0A087WUI2	P22626-2;P22626;A0A087WUI2	NaN	NaN	NaN	NaN	NaN	NaN	NaN	NaN	NaN	NaN	-1.14213	-1.33447	NaN	NaN	-1.04899	NaN	NaN	NaN	2.7292e-10	122700000	56718000	65983000	1	0	1	1	1	1	1	1	0	1	2	2	1	0	2	0	0	0	3	13.5	13.5	36.006	NaN	NaN
UQCRC2	Cytochrome b-c1 complex subunit 2, mitochondrial	P22695;H3BRG4;H3BSJ9;H3BP04;A0A087WVZ4;H3BUE4;H3BUI9	P22695;H3BRG4;H3BSJ9	0.279967	0.220812	0.240237	0.459409	0.436874	0.487584	0.569175	0.356315	0.183127	-0.274551	-0.450759	-0.322074	-0.972315	-1.02979	-0.844925	0.090197	0.0674366	0.0617605	9.4193e-93	1087400000	668170000	419280000	7	5	2	6	6	7	10	7	8	5	3	3	4	4	4	7	3	5	15	47	47	48.442	0	0.219172
SFPQ	Splicing factor, proline- and glutamine-rich	P23246;P23246-2;H0Y9K7;H0Y9U2	P23246;P23246-2	-0.911208	-1.39331	-1.59572	-0.896441	-1.29452	-1.32124	-1.01842	-1.07717	-1.12788	-1.01239	-0.755786	-1.03526	-0.901481	-0.962592	-0.773283	NaN	NaN	-0.640725	1.4754e-77	820600000	380590000	440010000	6	3	4	3	2	5	3	4	4	5	5	9	4	5	8	1	1	2	13	24.8	24.8	76.149	0	0.0987915
PPIB	Peptidyl-prolyl cis-trans isomerase B	P23284	P23284	-0.693767	-0.595778	NaN	NaN	NaN	0.0204159	NaN	-0.884973	-1.18405	-0.429097	0.0527707	-0.340377	-0.277316	-0.260701	-0.233748	NaN	NaN	NaN	3.6789e-29	593040000	338290000	254750000	2	2	0	0	1	2	1	2	2	5	4	7	4	5	5	0	1	1	8	37.5	37.5	23.742	0	0.665189
RPS3	40S ribosomal protein S3	P23396;P23396-2;E9PL09;E9PPU1;H0YEU2;F2Z2S8;H0YCJ7;H0YF32;E9PQ96;E9PJH4;E9PK82;E9PSF4;E9PQX2;H0YES8;E9PJN9	P23396;P23396-2;E9PL09;E9PPU1;H0YEU2;F2Z2S8;H0YCJ7;H0YF32	-0.116175	-0.000558919	0.0208189	0.339992	0.401291	0.225898	0.301333	0.327741	0.410393	-0.044702	-0.181287	-0.139447	-0.0771863	-0.0953429	-0.291664	-0.0270097	0.201535	-0.0375186	1.0116e-54	1416400000	893680000	522700000	7	7	7	6	9	8	11	7	8	7	6	8	8	8	9	5	2	4	14	61.3	61.3	26.688	0	0.340551
AHCY	Adenosylhomocysteinase	P23526;P23526-2	P23526;P23526-2	0.124065	-0.0896216	-0.0275997	0.265726	0.059066	0.122766	0.0489108	0.399546	0.271516	0.101124	0.131865	0.0981834	0.0176263	0.234192	0.119395	0.305532	-0.0566769	0.181593	4.8916e-118	1725900000	1122200000	603640000	6	4	6	6	4	7	5	3	5	9	6	10	9	8	6	2	3	3	14	36.1	36.1	47.716	0	0.150366
CFL1	Cofilin-1	P23528;G3V1A4;E9PP50;E9PK25;E9PQB7;E9PLJ3;E9PS23;Q9Y281-3;Q9Y281	P23528;G3V1A4;E9PP50;E9PK25;E9PQB7;E9PLJ3;E9PS23	0.0985399	0.0439499	0.0191112	0.13052	0.19058	0.186969	0.133289	0.151291	0.114432	0.0917483	0.0274397	0.121968	0.339696	0.223826	0.270763	0.0863711	0.177714	0.121454	0	6051500000	3987100000	2064500000	8	8	8	8	8	9	7	4	8	10	10	10	9	11	11	10	6	9	12	69.9	69.9	18.502	0	0.14302
RRM1	Ribonucleoside-diphosphate reductase large subunit	P23921;E9PL69;E9PP77;H0YCY7	P23921;E9PL69	0.0332987	-0.310463	-0.102154	-0.44419	-0.00408965	-0.133232	-0.305205	-0.491551	-0.22842	0.333535	0.456238	0.369418	0.453164	0.480863	0.691727	0.19624	0.688653	0.482523	4.0126e-187	1353000000	897210000	455800000	7	5	6	8	6	4	6	3	7	10	7	11	12	7	8	4	2	3	16	26.8	26.8	90.069	0	-0.0310772
EEF1B2	Elongation factor 1-beta	P24534;F8WF65;F2Z2G2;C9JZW3	P24534	NaN	NaN	NaN	NaN	NaN	NaN	NaN	NaN	NaN	-0.146637	0.0237655	-0.0527526	0.110209	NaN	0.0167078	NaN	NaN	NaN	1.3447e-99	325880000	199630000	126250000	0	1	0	1	1	0	2	0	0	2	3	2	2	2	2	1	1	0	3	16.4	16.4	24.763	NaN	NaN
ACAT1	Acetyl-CoA acetyltransferase, mitochondrial	P24752;H0YEL7;P24752-2;E9PRQ6;E9PKF3	P24752	0.472163	0.433414	0.349606	0.279796	0.280539	0.216037	-0.186696	-0.216634	0.0330502	-0.871843	-0.743901	-0.619701	-0.667558	-0.607469	-0.664508	0.187099	0.333866	0.425547	0	6855800000	4232700000	2623100000	13	13	13	13	15	14	14	13	12	13	14	13	12	14	13	11	11	12	16	46.1	46.1	45.199	0	-0.153618
MCM3	DNA replication licensing factor MCM3	P25205;P25205-2;J3KQ69	P25205;P25205-2;J3KQ69	0.0106974	0.115601	0.277462	0.221621	0.490419	0.307568	0.295106	0.00558905	0.444974	0.141057	-0.0474433	-0.0361518	0.019746	0.192408	0.238824	NaN	0.352567	-0.189865	7.2324e-50	666840000	431490000	235360000	3	4	5	5	2	3	3	2	3	6	8	8	10	9	7	1	2	2	12	16	16	90.98	0	0.191967
RPS12	40S ribosomal protein S12	P25398	P25398	-0.370115	-0.355351	-0.594971	NaN	-0.0460443	-0.432366	NaN	NaN	NaN	0.0513046	-0.171835	-0.0395481	-0.11267	0.0614055	0.00862239	-0.555068	NaN	NaN	1.3699e-159	1299200000	809340000	489880000	2	2	3	1	3	3	0	1	1	5	5	5	4	6	6	2	0	1	6	62.1	62.1	14.515	0	0.13091
ATP5A1	ATP synthase subunit alpha, mitochondrial	P25705-2;P25705;P25705-3;K7EK77;K7ENJ4;K7EQH4;K7EJP1;K7ERX7	P25705-2;P25705;P25705-3;K7EK77	0.0524337	0.102373	NaN	0.336319	0.394387	0.267587	0.378283	0.250831	0.33333	-0.0490078	0.0109915	0.113218	0.21741	0.220859	-0.162272	NaN	NaN	0.418213	4.0977e-60	484290000	303890000	180400000	2	3	1	3	4	3	2	3	2	5	4	7	4	3	4	1	1	2	9	20.9	20.9	54.493	0	0.258916
MSN;RDX	Moesin;Radixin	P26038;P35241;P35241-5;P35241-4;V9GZ54;E9PQ82;E9PNV3;P35241-3	P26038;P35241;P35241-5	NaN	NaN	NaN	NaN	NaN	NaN	NaN	NaN	-0.4092	-0.199268	-0.255144	-0.0906549	-0.238501	-0.0868057	-0.244327	NaN	NaN	0.27803	3.7019e-68	486100000	291930000	194170000	1	1	1	1	1	1	1	1	2	4	4	6	4	4	4	0	1	2	7	26.7	17.2	67.819	NaN	NaN
DNMT1	DNA (cytosine-5)-methyltransferase 1	P26358-3;P26358;P26358-2;K7ENW7	P26358-3;P26358;P26358-2;K7ENW7	0.387909	0.102989	0.450814	0.320438	0.361914	0.0744246	-0.0252604	0.0294264	0.365411	-0.288213	0.128339	-0.0188697	-0.50359	-0.348851	-0.537686	0.139039	0.236475	0.241448	6.7216e-30	496450000	299850000	196610000	5	6	6	6	7	4	4	5	6	6	3	6	3	7	4	3	2	3	11	9.3	9.3	144.46	0	-0.0674711
RPL13	60S ribosomal protein L13	P26373;P26373-2;J3QSB4;H3BTH3;H3BUK8;J3KS98	P26373;P26373-2;J3QSB4	-0.331385	-0.361744	-0.399413	-0.112522	-0.202512	-0.268797	-0.00688458	-0.114015	-0.118523	-0.232365	-0.152131	-0.124249	-0.231113	-0.27242	-0.234693	0.0595105	0.123241	0.168431	0	84865000000	51738000000	33127000000	13	13	13	15	13	12	11	11	12	18	17	18	18	19	18	16	11	17	19	58.8	58.8	24.261	0	0.159232
HMGB2	High mobility group protein B2	P26583;D6R9A6	P26583;D6R9A6	NaN	NaN	NaN	NaN	NaN	NaN	NaN	NaN	NaN	0.140974	0.0536756	0.184047	0.0293379	NaN	0.128186	NaN	NaN	NaN	6.0248e-22	178020000	115210000	62811000	1	0	0	0	0	0	1	0	1	2	2	3	2	1	3	0	0	0	3	22.5	12.4	24.033	NaN	NaN
PTBP1	Polypyrimidine tract-binding protein 1	P26599;P26599-2;P26599-3;A6NLN1;K7EKJ7;K7ELW5;K7ES59;A0A0D9SF20;A0A087WU68;K7EK45;O95758-1;O95758-6;O95758-2;O95758;O95758-5;O95758-4;A0A087WUW5;X6R242;O95758-7	P26599;P26599-2;P26599-3;A6NLN1	-0.113644	-0.12587	-1.25454	-0.299517	-0.163203	-0.147458	-0.313226	-0.00885785	-0.0902618	-0.144581	-0.116889	-0.200837	0.200109	0.165158	-0.102156	0.0703519	NaN	-0.0616193	1.6601e-121	1123000000	667310000	455680000	6	2	3	4	4	4	6	3	7	6	4	6	6	2	5	3	0	4	9	26.7	26.7	57.221	0	-0.0373334
TARS	Threonine--tRNA ligase, cytoplasmic	P26639;P26639-2;D6R9F8;D6RCA5;D6RDJ6;A2RTX5-2;B7ZLP8;A2RTX5	P26639;P26639-2	-0.472927	NaN	-0.0487137	-0.10623	-0.407842	-0.287573	0.013962	NaN	NaN	0.19318	0.0727084	0.120384	0.130679	0.13589	0.214128	NaN	NaN	NaN	6.6705e-73	781870000	485210000	296660000	4	1	3	4	3	2	3	1	1	8	6	14	7	6	5	1	1	1	14	24.3	24.3	83.434	0	-0.0267528
VARS	Valine--tRNA ligase	P26640;A2ABF4;A0A0G2JJT9;P26640-2	P26640	-0.230504	NaN	-0.172447	NaN	-0.000482589	NaN	0.116519	NaN	-0.0209444	0.405151	0.401743	0.200547	0.557205	0.329612	0.128677	NaN	NaN	NaN	3.0256e-58	463220000	313540000	149670000	2	1	2	1	2	1	2	1	2	6	5	7	7	6	5	1	0	0	8	8.9	8.9	140.47	0	0.200993
EEF1G	Elongation factor 1-gamma	P26641;P26641-2	P26641;P26641-2	-0.23478	-0.10177	-0.148005	-0.139939	0.050758	-0.163048	0.0202775	0.00532944	-0.0138026	-0.0782425	-0.129788	0.0260444	0.083234	-0.036004	0.00958051	-0.0564052	-0.0390701	-0.0248991	1.9391e-284	3620500000	2242200000	1378300000	7	7	5	7	9	9	9	7	10	12	11	13	11	8	13	7	4	7	19	53.8	53.8	50.118	0	0.00806539
YWHAQ	14-3-3 protein theta	P27348;E9PG15	P27348;E9PG15	-0.204763	-0.214932	-0.183491	-0.296883	-0.392797	-0.14313	-0.352253	-0.195797	-0.0891021	-0.231547	-0.154702	-0.325068	-0.00897567	-0.274661	0.00490162	0.0471425	NaN	-0.314633	9.7341e-182	1504700000	892010000	612670000	3	3	3	5	3	7	7	3	7	7	8	9	7	8	9	3	1	5	9	50.6	43.3	27.764	0	-0.0921198
CALR	Calreticulin	P27797;K7EJB9	P27797	-0.260149	-0.546615	-0.221885	-0.31768	NaN	NaN	NaN	NaN	NaN	-0.21104	-0.0398281	-0.0595596	-0.00874119	-0.181366	-0.0994917	NaN	NaN	0.211356	2.9905e-38	426710000	254210000	172490000	2	2	2	2	1	1	1	1	1	2	2	3	3	2	2	0	0	2	3	10.1	10.1	48.141	0	-0.0575313
CANX	Calnexin	P27824;P27824-2;H0Y9Q7;P27824-3;D6RHJ3;D6RD16;D6RAQ8;D6RFL1;D6RAU8;D6RB85;D6RDP7;H0Y9H1;D6RGY2	P27824;P27824-2;H0Y9Q7;P27824-3	NaN	-0.0572943	NaN	-0.371273	NaN	NaN	0.366484	NaN	NaN	NaN	0.183503	0.122082	NaN	0.117033	-0.0246268	NaN	NaN	NaN	5.306e-11	379820000	231950000	147870000	1	3	1	2	1	1	2	1	1	1	2	3	1	3	3	0	0	0	3	6.2	6.2	67.567	0	-0.313979
ABCD3	ATP-binding cassette sub-family D member 3	P28288;P28288-2;P28288-3	P28288;P28288-2	-0.210222	NaN	NaN	0.291201	-0.194557	0.194026	0.619884	NaN	NaN	0.0925566	-0.12908	-0.0527526	-0.0297361	0.347647	0.220925	NaN	NaN	NaN	7.9018e-38	286790000	180100000	106690000	3	1	1	3	2	4	3	1	0	6	2	4	6	2	6	0	0	0	10	18.8	18.8	75.475	0	0.404248
NDUFS1	NADH-ubiquinone oxidoreductase 75 kDa subunit, mitochondrial	P28331;P28331-2;P28331-4;P28331-5;B4DJ81;P28331-3;C9JPQ5;F8WDL5	P28331;P28331-2;P28331-4;P28331-5;B4DJ81;P28331-3	NaN	NaN	NaN	NaN	NaN	NaN	NaN	NaN	NaN	NaN	NaN	NaN	NaN	0.678669	1.06955	NaN	NaN	NaN	3.5865e-22	126650000	103950000	22705000	0	0	0	0	1	0	0	0	0	1	1	0	1	2	4	0	0	0	8	13.6	13.6	79.467	NaN	NaN
TKT	Transketolase	P29401;P29401-2;A0A0B4J1R6;E9PFF2;F8W888	P29401;P29401-2;A0A0B4J1R6	-0.00901557	0.386244	0.206986	0.214146	0.241022	0.319821	0.425674	NaN	0.359781	0.143121	0.469862	0.253129	0.313238	0.259843	0.291041	0.379744	0.539715	0.400993	1.1978e-116	1351400000	904860000	446500000	5	3	3	5	3	3	3	1	4	8	9	10	10	8	8	2	2	2	13	25.4	25.4	67.877	0	0.0340361
PRDX6	Peroxiredoxin-6	P30041	P30041	NaN	NaN	NaN	NaN	NaN	NaN	NaN	NaN	0.165422	0.25044	NaN	0.390955	0.318704	0.350146	NaN	NaN	NaN	-0.246413	3.6182e-24	161380000	105680000	55703000	0	0	1	1	0	1	0	1	2	2	0	3	4	3	1	0	0	2	5	24.1	24.1	25.035	NaN	NaN
PRDX5	Peroxiredoxin-5, mitochondrial	P30044-2;P30044;P30044-3;P30044-4	P30044-2;P30044;P30044-3;P30044-4	NaN	NaN	NaN	NaN	NaN	NaN	NaN	NaN	NaN	NaN	NaN	-0.0433908	0.478767	NaN	0.543801	NaN	NaN	NaN	1.0273e-18	130030000	83355000	46679000	0	0	0	0	0	1	1	0	0	0	1	5	3	0	2	0	0	0	5	45.1	45.1	17.031	NaN	NaN
PRDX3	Thioredoxin-dependent peroxide reductase, mitochondrial	P30048-2;P30048	P30048-2;P30048	1.93854	1.52393	1.21091	2.50624	2.40203	2.71204	2.5419	NaN	2.14215	0.486197	0.3034	0.286443	1.3756	1.48221	1.42146	NaN	NaN	NaN	4.7079e-40	675740000	550560000	125180000	3	2	3	3	4	5	4	1	4	2	2	3	4	2	4	1	0	0	5	23.1	23.1	25.838	0	0.982307
RPL12	60S ribosomal protein L12	P30050;P30050-2	P30050;P30050-2	NaN	NaN	NaN	NaN	NaN	NaN	NaN	NaN	NaN	-0.0892357	-0.23328	-0.266573	-0.478323	NaN	NaN	NaN	NaN	NaN	9.4749e-10	128130000	74548000	53584000	0	0	0	0	0	1	0	0	0	2	2	2	2	1	1	0	0	1	2	14.5	14.5	17.818	NaN	NaN
PEBP1	Phosphatidylethanolamine-binding protein 1;Hippocampal cholinergic neurostimulating peptide	P30086	P30086	NaN	NaN	NaN	NaN	NaN	NaN	NaN	NaN	NaN	NaN	0.0489313	0.144713	NaN	0.199024	NaN	NaN	NaN	NaN	1.9024e-25	154120000	98491000	55626000	0	0	0	0	0	0	1	0	0	1	2	4	1	2	1	0	0	0	4	29.4	29.4	21.057	NaN	NaN
PDIA3	Protein disulfide-isomerase A3	P30101	P30101	0.393018	0.351825	0.294974	0.173712	0.317178	0.275239	0.288418	0.241555	0.359405	0.442441	0.429271	0.368309	0.264352	0.180644	0.122559	-0.0384643	0.0331263	-0.0447089	0	40645000000	27438000000	13207000000	30	27	26	28	30	32	30	25	29	27	27	26	26	25	28	25	22	25	28	64	64	56.782	0	-0.0765859
PPP2R1A	Serine/threonine-protein phosphatase 2A 65 kDa regulatory subunit A alpha isoform	P30153;B3KQV6;C9J9C1;E9PH38;P30154-4;P30154;P30154-2;P30154-5;P30154-3;H0YDG7;M0QXG4;M0R0K6;E9PPI5;E9PNM7;E9PHZ6	P30153;B3KQV6;C9J9C1	0.163287	0.253987	0.170618	0.189955	0.322859	0.245733	0.152662	0.175539	0.103373	-0.377312	-0.410318	-0.266357	-1.01846	-0.921302	-0.954835	0.0296394	0.0106765	0.0773358	2.381e-239	6186000000	3655500000	2530500000	21	16	14	23	16	21	21	15	19	19	16	16	16	15	19	17	10	12	25	54.8	54.8	65.308	0	0.075115
ADSL	Adenylosuccinate lyase	P30566;P30566-2;A0A0A6YY92;A0A096LNY4;A0A096LNY5;A0A096LNY6;B4DEP1;A0A096LPA2;A0A096LP72;A0A096LP92	P30566;P30566-2;A0A0A6YY92;A0A096LNY4;A0A096LNY5;A0A096LNY6	0.43098	0.501237	0.258986	0.963822	0.625275	0.419698	0.699262	NaN	NaN	0.548221	0.441655	0.440517	0.487665	0.393602	0.378739	NaN	NaN	NaN	1.2875e-26	399690000	280500000	119190000	2	3	2	2	2	5	2	1	1	3	4	4	2	3	3	1	1	1	6	13.2	13.2	54.889	0	0.194295
MAT2A	S-adenosylmethionine synthase isoform type-2	P31153-2;P31153	P31153-2;P31153	NaN	NaN	NaN	NaN	NaN	0.0484781	NaN	NaN	NaN	0.102046	-0.137429	0.20774	0.353335	-0.0549657	0.318421	NaN	NaN	NaN	8.2459e-23	278510000	176420000	102080000	0	0	0	0	0	2	0	0	1	3	3	3	3	2	3	0	0	1	2	13.7	13.7	32.964	NaN	NaN
DNAJA1	DnaJ homolog subfamily A member 1	P31689;P31689-2	P31689;P31689-2	-0.00310259	NaN	NaN	-0.10482	-0.0623265	0.00613205	-0.157199	-0.196099	0.26007	0.147789	0.375893	0.0684951	0.414551	0.390845	0.621677	0.0596003	NaN	NaN	1.4399e-19	352350000	234810000	117540000	3	1	1	2	2	3	2	3	3	2	2	2	4	3	3	2	1	1	6	24.9	24.9	44.868	0	-0.0592239
UQCRC1	Cytochrome b-c1 complex subunit 1, mitochondrial	P31930	P31930	NaN	0.637119	NaN	NaN	NaN	1.28353	1.14246	1.11715	0.833537	0.219509	0.284187	0.278878	0.517347	0.462427	0.151824	NaN	NaN	NaN	4.2546e-15	257870000	179250000	78628000	1	2	1	1	1	3	2	2	2	2	2	3	2	3	2	1	0	0	4	11.5	11.5	52.645	0	0.64641
ATIC	Bifunctional purine biosynthesis protein PURH;Phosphoribosylaminoimidazolecarboxamide formyltransferase;IMP cyclohydrolase	P31939-2;P31939;C9JLK0;H7C1S2;F8WEF0	P31939-2;P31939	NaN	NaN	NaN	NaN	NaN	NaN	NaN	NaN	NaN	0.0184764	-1.00703	0.202551	0.364826	0.0805969	0.322914	NaN	NaN	NaN	3.8595e-27	152300000	95592000	56711000	0	0	0	0	0	0	0	0	0	3	2	6	2	2	3	0	0	0	7	13.9	13.9	64.523	NaN	NaN
YWHAB	14-3-3 protein beta/alpha;14-3-3 protein beta/alpha, N-terminally processed	P31946-2;P31946;Q4VY20;Q4VY19;A0A0J9YWE8;A0A0J9YWZ2	P31946-2;P31946	-0.22671	-0.369551	-0.224797	0	-0.293844	-0.36441	0.374309	-8.62889e-05	0.045672	-0.142201	0	-0.07508	-0.129255	-0.0474697	-0.00759822	-0.178069	-0.0467878	-0.0213377	1.9737e-65	737520000	439760000	297760000	3	2	4	4	4	3	3	2	3	5	5	5	4	3	5	3	2	3	5	45.5	34.4	27.85	0	-0.0671338
SFN	14-3-3 protein sigma	P31947;P31947-2	P31947;P31947-2	-0.223792	-0.337908	-0.3144	-0.366814	-0.695802	-0.319792	-0.465589	-0.244207	-0.428738	0.32357	-0.663794	-0.162017	0.156264	-0.816816	0.246962	NaN	NaN	-0.285463	9.0008e-89	1606900000	820230000	786710000	3	2	3	2	3	2	3	2	3	5	3	4	5	4	5	1	0	3	10	54.4	47.2	27.774	0	-0.0524142
STIP1	Stress-induced-phosphoprotein 1	P31948;P31948-2;P31948-3;F5H783;F5GXD8;H0YGI8	P31948;P31948-2;P31948-3	-0.0844754	NaN	-0.0830575	0.407166	-0.103055	NaN	-0.0985122	NaN	0.460053	-0.00490823	0.077915	0.0468315	0.0802089	0.107979	0.0579119	-0.137972	NaN	NaN	4.2332e-76	1292200000	814100000	478120000	6	1	3	5	2	1	3	1	5	8	10	11	13	11	10	2	0	1	14	30	30	62.639	0	0.235822
S100A11	Protein S100-A11	P31949	P31949	NaN	NaN	NaN	NaN	NaN	0.417346	NaN	NaN	NaN	NaN	NaN	0.196635	0.390903	0.453694	0.461622	NaN	NaN	NaN	1.5146e-42	258360000	169150000	89208000	0	0	0	1	0	3	0	0	0	2	2	3	3	2	2	0	1	0	4	42.9	42.9	11.74	NaN	NaN
PRDX2	Peroxiredoxin-2	P32119;A6NIW5;P32119-2	P32119;A6NIW5	1.29936	1.45836	1.30273	1.31205	1.43646	1.55486	1.48918	NaN	1.59419	0.773887	0.598238	0.668033	1.72968	0.996467	1.5971	NaN	NaN	NaN	3.9253e-26	484370000	378590000	105780000	3	2	2	3	2	2	2	1	3	3	2	2	4	2	4	1	0	0	5	28.3	22.7	21.892	0	0.133729
KIF5B	Kinesin-1 heavy chain	P33176;C9JWB9;O60282-2;A0A0G2JMZ6;J3KNA1;O60282;Q12840	P33176	NaN	NaN	NaN	NaN	NaN	NaN	NaN	NaN	NaN	-0.596672	NaN	0.170836	NaN	NaN	NaN	NaN	NaN	NaN	1.6838e-13	74246000	46430000	27816000	0	0	0	1	1	0	0	0	0	2	2	3	2	1	1	0	0	0	4	4.5	4.5	109.68	NaN	NaN
MCM5	DNA replication licensing factor MCM5	P33992;B1AHB1;B1AHB2;B1AHA9	P33992;B1AHB1	NaN	NaN	NaN	NaN	NaN	NaN	NaN	NaN	NaN	NaN	-0.778701	-0.148794	0.0102173	NaN	NaN	NaN	NaN	NaN	3.8504e-21	103150000	62510000	40645000	0	0	1	0	0	0	0	0	0	1	2	4	3	1	0	1	0	0	4	7.9	7.9	82.285	NaN	NaN
SHMT2	Serine hydroxymethyltransferase, mitochondrial;Serine hydroxymethyltransferase	P34897-3;P34897;P34897-2;H0YIZ0;G3V2Y4;G3V5L0;G3V540;G3V4W5;G3V2D2;G3V241;G3V3Y8;G3V4T0;G3V4X0;G3V2W0;G3V2E4;P34896-4;P34896-3;P34896-2;P34896	P34897-3;P34897;P34897-2;H0YIZ0;G3V2Y4	NaN	NaN	NaN	NaN	NaN	-0.104207	NaN	NaN	0.467509	0.455966	0.631478	0.719543	0.332776	NaN	0.439177	NaN	NaN	NaN	8.5636e-37	306150000	218140000	88012000	1	1	0	1	0	3	2	0	3	4	3	8	3	2	5	1	0	0	10	22.4	22.4	53.454	NaN	NaN
HSPA4	Heat shock 70 kDa protein 4	P34932;A0A087WYC1;A0A087WTS8;P34932-2	P34932;A0A087WYC1;A0A087WTS8	-0.0305512	NaN	NaN	0.214355	0.305407	-0.000659764	0.287843	NaN	0.334181	-0.0769014	-0.0839673	0.176059	0.171019	0.145764	0.19036	NaN	NaN	NaN	0	1227600000	778910000	448710000	3	1	1	4	2	4	2	1	4	9	8	19	11	8	10	0	0	0	18	32.3	32.3	94.33	0	0.244906
MYH9	Myosin-9	P35579;P35579-2;P35580;P35580-5;P35580-2;P35580-3;P35580-4;P35749-4;P35749-3;P35749;P35749-2;B1PS43;Q5BKV1;B1AH99;A0A0C4DFM8;E7ERA5;A1L2Z2	P35579;P35579-2	-0.505553	-0.650039	-0.545812	-0.624462	-0.549925	-0.481524	-0.550017	-0.577342	-0.488035	0.204347	0.143405	0.129861	0.208972	0.276754	0.224289	-0.146477	-0.123809	-0.298465	0	9622500000	5923600000	3698900000	31	20	26	39	18	20	28	19	31	49	40	51	44	42	50	28	19	31	63	40.9	40.9	226.53	0	-0.00411284
SOAT1	Sterol O-acyltransferase 1	P35610;B1APM4;P35610-3;P35610-2	P35610;B1APM4;P35610-3;P35610-2	NaN	NaN	NaN	0.506914	NaN	NaN	0.391413	NaN	NaN	0.49308	NaN	0.481996	-0.00384127	0.34997	0.0981739	NaN	NaN	NaN	6.6296e-14	337720000	215530000	122190000	0	0	1	3	1	1	2	1	1	2	1	3	2	2	3	1	1	1	3	7.5	7.5	64.734	NaN	NaN
GLRX	Glutaredoxin-1	P35754	P35754	-0.904701	-0.839959	-0.61124	-1.96211	-1.48331	-1.56651	-1.90791	-1.84061	-1.28095	-0.894723	-0.770204	-0.941782	-2.28783	-2.12119	-2.42839	-0.688246	-0.505777	-0.591183	4.8122e-99	2860500000	1260700000	1599800000	5	4	4	4	4	4	4	4	5	4	4	4	4	3	4	5	3	6	6	73.6	73.6	11.776	0	-0.726555
HMGCL	Hydroxymethylglutaryl-CoA lyase, mitochondrial	P35914;P35914-3;P35914-2;H0Y2L7;G5E9S9;B7Z4D4;B7Z212;Q8TB92-5;Q8TB92-2;Q8TB92	P35914;P35914-3;P35914-2	0.954796	1.00139	0.745534	1.22504	1.13123	1.17515	0.824418	0.748649	0.679948	-0.712456	-0.642225	-0.691574	-1.75677	-1.52564	-1.62828	-0.0542163	-0.0221981	-0.114645	1.5233e-167	2479700000	1613900000	865820000	10	7	7	8	8	10	10	5	11	6	4	6	6	4	6	8	4	9	12	43.1	43.1	34.36	0	0.220352
RPL4	60S ribosomal protein L4	P36578;H3BM89;H3BTP7;H3BU31	P36578;H3BM89	-0.372587	-0.349448	-0.427667	-0.240506	-0.317893	-0.442035	-0.175499	-0.0381094	-0.191561	-0.146774	-0.082092	-0.141783	-0.169141	-0.123348	-0.170428	-0.0115846	0.0399368	-0.00218579	3.9929e-292	5841000000	3510600000	2330400000	11	10	9	10	10	10	13	9	14	16	14	15	18	14	14	11	10	11	22	49.9	49.9	47.697	0	0.054694
TAGLN2	Transgelin-2	P37802;P37802-2;X6RJP6;C9J5W6;Q9UI15	P37802;P37802-2;X6RJP6	-0.523882	-0.525289	-0.565975	-0.302835	-0.467718	-0.561999	-0.220481	-0.518398	-0.468334	0.0718495	0.111282	-0.0201275	0.0389638	0.0810355	0.114089	-0.0250587	-0.0687336	0.0567726	6.7984e-149	2240900000	1398100000	842850000	7	6	4	7	6	9	6	5	5	10	7	9	9	8	10	6	6	6	11	70.9	70.9	22.391	0	0.0575708
ATP6V1A	V-type proton ATPase catalytic subunit A	P38606-2;P38606;C9JA17;C9JVW8	P38606-2;P38606	0.40797	0.439813	0.408743	0.0621999	0.154464	0.115684	-0.272842	-0.131943	0.00479759	-1.29336	-1.22022	-1.26882	-2.52651	-2.44652	-2.45912	-0.106603	-0.164794	-0.200509	4.2262e-200	4746800000	2509500000	2237300000	13	14	12	15	14	15	17	13	13	13	16	14	9	15	13	12	6	16	22	47.1	47.1	64.735	0	-0.293059
HSPA9	Stress-70 protein, mitochondrial	P38646;D6RA73;D6RJI2;H0YBG6	P38646	NaN	NaN	NaN	NaN	NaN	NaN	NaN	NaN	NaN	0.00857869	-0.0344452	0.198634	-0.0745021	0.132887	-0.0246008	NaN	NaN	NaN	8.0709e-44	294620000	183830000	110780000	0	0	1	0	0	0	0	0	0	4	6	9	4	6	4	0	0	0	9	14.9	14.9	73.68	NaN	NaN
RPL3	60S ribosomal protein L3	P39023;G5E9G0;B5MCW2;H7C422;H7C3M2;F8WCR1;Q92901	P39023;G5E9G0;B5MCW2;H7C422	-0.691205	-0.743619	-0.598737	-0.438776	-0.490059	-0.65659	-0.30749	-0.38079	-0.493994	-0.339325	-0.232847	-0.183529	-0.122882	-0.346527	-0.371182	0.11986	0.124154	0.102789	5.4805e-94	1314400000	774580000	539830000	7	2	6	4	4	3	6	3	3	11	8	9	9	8	8	4	2	6	12	30	30	46.108	0	0.201146
TXLNA	Alpha-taxilin	P40222	P40222	NaN	NaN	NaN	NaN	NaN	NaN	NaN	NaN	NaN	NaN	0.000605822	-0.137224	-0.00607319	0.138079	0.227971	NaN	NaN	NaN	2.3646e-10	71237000	42938000	28299000	0	0	0	0	0	0	0	0	0	1	2	2	2	3	2	0	0	0	3	5.9	5.9	61.89	NaN	NaN
CCT6A	T-complex protein 1 subunit zeta	P40227;P40227-2;Q92526-2;Q92526;Q92526-3;J3KRI6	P40227;P40227-2	-0.227854	-0.0557788	-0.268897	-0.00528625	-0.149618	-0.137237	0.138075	-0.414232	-0.231652	-0.172677	-0.279139	-0.13687	-0.0367056	-0.422179	-0.15131	-0.228577	NaN	0.0364985	1.2163e-104	765640000	470540000	295100000	3	3	2	3	2	3	4	2	3	4	4	11	7	4	8	2	0	2	15	35.4	35.4	58.024	0	0.0906178
RPL13A;RPL13a	60S ribosomal protein L13a	P40429;M0QYS1;Q8J015;Q6NVV1;M0QZU1;A0A096LPE0	P40429;M0QYS1;Q8J015	-0.460677	-0.519303	-0.500363	-0.336941	-0.364244	-0.469316	-0.145004	-0.26043	-0.334409	-0.220311	-0.139211	-0.204297	-0.300377	-0.18895	-0.274097	-0.0310166	-0.0850325	0.047795	3.62e-87	15038000000	9022100000	6015400000	11	12	11	10	12	11	11	10	11	12	11	10	9	12	12	8	8	9	14	51.2	51.2	23.577	0	0.136119
STAT3	Signal transducer and activator of transcription 3	P40763-3;P40763;P40763-2;G8JLH9	P40763-3;P40763;P40763-2;G8JLH9	-0.564065	-3.0322	-2.4149	-0.638452	-0.447839	NaN	-0.615628	NaN	NaN	0.295788	0.477093	0.151547	0.581386	0.411761	0.417287	-0.245676	-0.661332	-0.263954	3.7701e-142	1449800000	622510000	827340000	3	2	2	2	2	1	2	1	1	7	4	7	8	8	7	3	4	4	10	21.2	21.2	83.125	0	1.87175
MDH1	Malate dehydrogenase, cytoplasmic;Malate dehydrogenase	P40925;P40925-3;B9A041;P40925-2;B8ZZ51;C9JF79;C9JRL4;C9JLV6	P40925;P40925-3;B9A041;P40925-2;B8ZZ51;C9JF79	0.109996	0.482698	0.0104181	0.689682	0.250209	0.375526	0.179323	NaN	0.13458	0.422659	0.175055	0.276229	0.144099	0.0222551	-0.0410713	0.399508	NaN	NaN	4.9199e-57	836240000	569910000	266320000	3	3	2	3	2	3	4	1	4	4	5	6	6	3	6	3	1	1	8	31.1	31.1	36.426	0	0.26553
MDH2	Malate dehydrogenase, mitochondrial;Malate dehydrogenase	P40926;G3XAL0;P40926-2	P40926;G3XAL0;P40926-2	0.263424	NaN	0.0608868	0.568411	NaN	0.0774246	1.05008	0.353594	0.0125425	0.227268	-0.466273	0	-0.125207	NaN	-0.0153657	NaN	NaN	NaN	1.7693e-59	600990000	335730000	265270000	2	0	3	3	1	3	2	2	2	4	3	8	4	1	3	0	0	1	9	35.2	35.2	35.503	0	0.160762
HADHA	Trifunctional enzyme subunit alpha, mitochondrial;Long-chain enoyl-CoA hydratase;Long chain 3-hydroxyacyl-CoA dehydrogenase	P40939;H0YFD6;P40939-2	P40939	0.0704824	0.097858	0.211553	0.0601078	0.557793	NaN	0.272144	0.186623	0.131165	0.118467	0.0181861	0.027184	0.140878	0.115655	0.0713285	NaN	-0.240958	0.199104	3.5936e-57	760650000	475370000	285280000	6	5	5	6	4	3	2	2	5	8	4	10	9	5	10	1	3	2	15	26.1	26.1	82.999	0	0.211092
GARS	Glycine--tRNA ligase	P41250	P41250	NaN	NaN	NaN	-0.111451	NaN	NaN	NaN	NaN	NaN	0.187758	0.172049	0.0631302	0.0298493	0.143839	0.173885	NaN	NaN	NaN	5.4208e-30	317230000	201890000	115340000	1	1	1	2	1	1	1	0	1	3	4	8	5	2	4	0	0	1	9	14.6	14.6	83.165	NaN	NaN
TMPO	Lamina-associated polypeptide 2, isoform alpha;Thymopoietin;Thymopentin	P42166;P42167-3	P42166	NaN	0.752355	0.485507	NaN	NaN	NaN	0.29554	NaN	NaN	0.357813	0.0907051	-0.271712	0.40531	0.733405	0.349966	NaN	NaN	NaN	9.2713e-39	427920000	283000000	144920000	0	2	2	0	1	0	2	0	0	4	2	6	7	3	9	1	0	0	5	22	22	75.491	0	NaN
STAT1	Signal transducer and activator of transcription 1-alpha/beta	P42224;P42224-2;J3KPM9;E7EPD2;D2KFR9;E7ENM1;H7BZB5;E9PH66;H7BZ88	P42224;P42224-2;J3KPM9	-0.0240673	-0.138656	0.0649169	-0.10537	-0.0901072	0.0450305	-0.0425364	-0.0748284	-0.0570931	-0.0201655	-0.0343743	0.0842693	0.165456	0.0969103	0.15153	0	-0.316809	-0.00909883	1.0881e-106	1310700000	823330000	487390000	8	7	9	7	5	9	5	4	6	10	9	13	10	10	14	3	3	2	19	29.3	29.3	87.334	0	-0.0660399
CASP2	Caspase-2;Caspase-2 subunit p18;Caspase-2 subunit p13;Caspase-2 subunit p12	P42575;P42575-2;A0A087WYM1;C9JRR9	P42575;P42575-2	NaN	NaN	-0.095578	NaN	0.138105	NaN	NaN	NaN	NaN	0.0505716	-1.17908	-0.0186643	-0.688098	-1.31372	NaN	NaN	NaN	NaN	7.4962e-20	196960000	101210000	95750000	1	1	3	1	2	1	1	0	0	3	2	2	2	2	1	1	0	1	5	14.6	14.6	50.685	0	0.233683
LRPPRC	Leucine-rich PPR motif-containing protein, mitochondrial	P42704;B8ZZ38;A0A0C4DG06;C9JCA9	P42704	-0.0269095	-0.0721727	-0.520974	0.304697	0.270924	-0.0635617	0.435737	0.250797	0.0549215	0.0682681	-0.0829384	0.0847108	0.203329	0.00113377	0.00939424	-0.459942	-0.155757	-0.152663	2.4766e-166	1880400000	1165200000	715200000	10	11	9	9	6	6	15	8	11	17	13	24	22	16	21	4	6	7	34	26.9	26.9	157.9	0	0.343097
ACAA2	3-ketoacyl-CoA thiolase, mitochondrial	P42765;A0A0B4J2A4;K7EME0;K7ER88;K7EJB1;K7EJ68	P42765;A0A0B4J2A4;K7EME0	0.43645	0.440746	0.570718	1.12118	1.13996	1.19438	0.850509	0.766881	0.61663	-0.145952	-0.233795	-0.132865	-0.053784	-0.0740751	-0.339736	NaN	NaN	NaN	6.9345e-35	373320000	247760000	125560000	2	3	3	4	3	3	5	2	2	4	3	5	4	4	4	1	1	0	10	27.7	27.7	41.924	0	0.699211
RPL35	60S ribosomal protein L35	P42766;F2Z388	P42766;F2Z388	-0.470534	-0.482179	-0.459148	-0.268863	-0.367775	-0.483283	-0.207934	-0.261678	-0.367787	-0.395793	-0.348741	-0.212965	-0.452239	-0.503898	-0.474476	-0.0190763	0.0676843	0.100012	4.6372e-179	8504800000	5018300000	3486500000	5	5	5	5	5	5	5	4	4	5	5	5	5	5	5	6	3	3	6	37.4	37.4	14.551	0	0.102759
MSH2	DNA mismatch repair protein Msh2	P43246;V9H019;P43246-2;E9PHA6;A0A087X078;A0A087X1E7;V9H0B2;V9H015;C9J809	P43246;V9H019;P43246-2;E9PHA6;A0A087X078;A0A087X1E7;V9H0B2	-0.391537	-0.427123	-0.413092	-0.0144782	NaN	NaN	-0.0574824	NaN	NaN	0.387787	-0.185107	0.0479607	0.230973	0.219475	0.0448644	NaN	NaN	-0.229809	2.0946e-43	418170000	257560000	160610000	3	2	3	3	2	1	2	0	1	5	4	6	10	6	6	0	1	3	12	13.6	13.6	104.74	0	0.398614
BTD	Biotinidase	P43251-4;P43251;P43251-3;P43251-2;C9JSN9	P43251-4;P43251;P43251-3;P43251-2;C9JSN9	NaN	0.0546548	0.22688	-0.132852	0.11971	-0.0293893	NaN	NaN	NaN	NaN	NaN	NaN	NaN	NaN	NaN	NaN	NaN	NaN	3.7785e-05	33572000	21561000	12011000	1	2	2	2	2	2	0	0	0	0	0	0	0	0	0	1	0	0	2	4.2	4.2	58.913	0	-0.170157
MAGEA1	Melanoma-associated antigen 1	P43355;A0A075B7A9;Q3SYA6;A2A368;A8MXT2;Q96M61;Q8TD91-2;O15480;A0A0A0MSA3	P43355	0.23376	0.460327	0.576231	-0.0921418	0.372765	0.128977	0.017152	NaN	0.553687	-0.302832	0.0995807	0.100581	-0.419342	-0.362395	-0.569957	0.129654	NaN	0.175036	7.3686e-53	701920000	436530000	265380000	4	3	3	4	2	3	4	0	3	4	6	7	6	5	6	3	1	3	6	23	17.5	34.342	0	-0.33135
MAGEA4	Melanoma-associated antigen 4	P43358;C9J9C2;C9JK50;C9JIR1;C9JZJ5;P43363	P43358	0.286414	0.20596	0.343687	-0.106684	0.0455967	0.0478094	-0.0919864	0.0319229	0.141499	0.273348	0.212486	0.216632	0.318557	0.326662	0.274534	0.019507	-0.0993853	-0.041886	3.3217e-223	7293600000	4857600000	2436000000	12	10	9	11	9	10	9	8	11	9	7	9	10	8	9	9	6	9	9	48.3	48.3	34.899	0	-0.240817
RANBP1	Ran-specific GTPase-activating protein	P43487-2;P43487;C9JXG8;F6WQW2;Q9C010;Q9C010-2;Q5T0Z6;C9JJ34;C9JGV6	P43487-2;P43487;C9JXG8;F6WQW2	NaN	NaN	NaN	-0.118004	-0.0441465	-0.0997712	NaN	-0.0127963	NaN	NaN	NaN	0.163328	NaN	NaN	NaN	NaN	NaN	NaN	1.344e-09	104100000	65662000	38438000	1	1	1	2	2	2	1	2	1	1	1	2	0	1	0	0	0	1	3	25	25	23.239	NaN	NaN
VDAC2	Voltage-dependent anion-selective channel protein 2	P45880;A0A0A0MR02;P45880-2;P45880-1;A2A3S1	P45880;A0A0A0MR02;P45880-2;P45880-1	0.248552	0.292673	0.255509	0.261282	0.255599	0.262768	0.225909	0.184073	0.293964	-0.0467587	-0.0606272	-0.0849506	-0.158804	-0.151541	-0.206109	-0.125727	-0.191027	-0.189986	0	45357000000	29107000000	16250000000	12	12	12	12	12	12	12	12	12	12	12	13	11	13	12	11	10	11	5	57.5	57.5	31.566	0	0.00577319
USP5	Ubiquitin carboxyl-terminal hydrolase 5	P45974-2;P45974;F5H571;H7C5J3;Q92995-2;Q92995	P45974-2;P45974	0.204202	0.166797	0.123156	0.0597058	0.161634	0.135755	0.181591	0.213544	0.232329	0.119318	0.123185	0.127159	0.150986	0.1015	0.028881	-0.0452323	-0.015836	0.0406861	7.8553e-192	2996300000	1966200000	1030200000	14	10	10	11	5	11	9	6	9	14	10	13	14	11	14	11	10	9	20	34.6	34.6	93.307	0	-0.031042
MAPK9	Mitogen-activated protein kinase 9	P45984-3;P45984-2;P45984-4;P45984;J3KNK1;D7R525;A6NF29;P45984-5;P53779-4;P45983-5;Q499Y8;A8MWW6;H0Y9H3;P45983-3;P45983-2;P53779-2;P53779-3;P45983-4;P45983;P53779	P45984-3;P45984-2;P45984-4;P45984;J3KNK1	-0.054529	NaN	0.0828692	NaN	0.274656	-0.266454	NaN	NaN	NaN	NaN	NaN	NaN	NaN	-0.522509	-1.96679	NaN	NaN	NaN	7.0255e-09	104130000	51053000	53074000	2	1	2	2	2	2	1	1	1	1	1	1	0	1	2	0	0	0	3	8.6	8.6	44.223	0	-0.0100696
RANGAP1	Ran GTPase-activating protein 1	P46060;H0Y4Q3;B0QYT5;B0QYT4;B0QYT6	P46060	NaN	NaN	NaN	NaN	NaN	NaN	0.175168	NaN	NaN	-0.0582605	0.103636	0.0367074	0.257501	0.169504	0.504357	NaN	NaN	NaN	1.699e-61	494050000	284450000	209600000	0	0	0	0	0	0	2	0	0	7	6	9	8	9	5	0	0	0	9	17.9	17.9	63.541	NaN	NaN
RECQL	ATP-dependent DNA helicase Q1	P46063;F8WA66;F8WD97;F5H2L2;F5H4P4;F5H3W0	P46063	NaN	NaN	NaN	NaN	NaN	NaN	NaN	NaN	NaN	-0.140299	0.197297	0.00463889	-0.00519262	0.457257	-0.0497093	NaN	NaN	NaN	5.6624e-28	202510000	126070000	76446000	0	0	1	1	0	1	0	0	1	4	4	5	3	4	3	0	1	0	7	11.2	11.2	73.457	NaN	NaN
CRKL	Crk-like protein	P46109	P46109	0.426308	-0.0287	0.107467	-0.211403	-0.232961	0.0564204	-0.129888	-0.571355	0.0601506	0.0923678	-0.0162598	0.035347	-0.66427	-0.545549	-0.621347	-0.0329876	0.166336	-0.13773	1.0642e-107	1779800000	1061200000	718680000	5	5	4	4	4	8	5	2	3	7	7	9	9	8	9	7	4	6	9	31.7	31.7	33.777	0	-0.318869
RPL5	60S ribosomal protein L5	P46777;Q5T7N0	P46777;Q5T7N0	-0.22147	-0.596707	-0.615803	-0.39164	NaN	-0.2394	-0.0217617	-0.314242	-0.360688	0.00753674	-0.0935347	-0.204138	-0.420333	-0.24229	-0.0963034	0.0529549	NaN	NaN	3.5554e-33	962000000	581010000	380990000	3	2	2	3	2	3	3	3	2	5	5	6	6	3	3	3	0	1	7	32.3	32.3	34.362	0	0.281187
RPL21	60S ribosomal protein L21	P46778;G3V1B3;M0R181	P46778;G3V1B3;M0R181	-0.470644	NaN	-0.922456	NaN	-0.407801	-0.404683	-0.376583	NaN	NaN	-0.483016	-0.394777	-0.305937	-0.448853	NaN	NaN	NaN	NaN	NaN	2.2047e-10	279140000	162940000	116200000	2	0	2	1	2	2	2	1	1	2	2	2	3	1	1	1	1	1	3	20.6	20.6	18.565	0	0.290308
IQGAP1	Ras GTPase-activating-like protein IQGAP1	P46940;A0A0J9YXZ5;H0YLE8;H0YKA5;A0A087X225;E9PDT6;F2Z2E2;Q86VI3	P46940;A0A0J9YXZ5;H0YLE8	NaN	NaN	NaN	NaN	NaN	NaN	NaN	NaN	NaN	-0.367708	0.112277	-0.0231777	-0.187527	-0.0568003	-0.177275	NaN	NaN	NaN	5.6169e-119	572710000	305010000	267700000	0	0	0	0	0	1	1	0	0	6	4	16	7	9	4	0	0	0	17	13.7	13.7	189.25	NaN	NaN
STT3A	Dolichyl-diphosphooligosaccharide--protein glycosyltransferase subunit STT3A	P46977;P46977-2;A0A0C4DH80;E9PN73;E9PI32	P46977;P46977-2	-0.910593	-0.307039	NaN	NaN	NaN	NaN	NaN	NaN	-1.01655	-0.223474	0.130937	NaN	-0.599949	-1.04875	-1.09417	NaN	NaN	NaN	4.5689e-15	194060000	105620000	88444000	2	3	1	1	1	0	1	1	2	3	2	1	4	2	3	0	1	0	6	7.4	7.4	80.529	0	NaN
CAPZB	F-actin-capping protein subunit beta	P47756-2;B1AK87;P47756;B1AK88;B1AK85	P47756-2;B1AK87;P47756;B1AK88;B1AK85	-0.112828	0.0513549	-0.0862051	-0.0372302	-0.132034	-0.16314	-0.185888	0.0292209	0.0461269	0.0946868	0.222712	0.062804	0.230351	0.218799	0.209624	-0.0349279	-0.17288	-0.401541	1.83e-185	1865300000	1198500000	666820000	6	3	4	6	5	4	6	5	8	9	8	8	8	9	9	4	6	4	11	54	54	30.628	0	-0.045829
QARS	Glutamine--tRNA ligase	P47897-2;P47897;H7C0R3;C9J165;F2Z2V6	P47897-2;P47897	-0.0135778	-0.0879509	-0.0153513	0.0615827	0.0335782	-0.0301748	0.10022	0.0353372	0.106249	-0.0921784	-0.0427004	-0.0291567	-0.388561	-0.305606	-0.319233	-0.201943	-0.113001	-0.121251	0	8657400000	5354700000	3302600000	28	20	20	28	25	27	27	20	25	25	20	27	22	21	25	18	16	15	32	49.6	49.6	86.578	0	0.0489295
RPL29	60S ribosomal protein L29	P47914	P47914	-0.274217	-0.556782	-0.422033	-0.142224	-0.228143	-0.442226	0.0136053	-0.0594584	-0.125705	-0.0587944	-0.0329779	0.0319644	-0.14213	-0.200205	-0.209819	0.332395	0.42544	0.456014	7.1521e-47	5376000000	3351200000	2024800000	4	4	4	3	4	2	5	2	5	5	4	4	4	5	4	4	4	3	6	25.8	25.8	17.752	0	0.19389
ATP5O	ATP synthase subunit O, mitochondrial	P48047;H7C0C1;H7C086	P48047;H7C0C1	NaN	NaN	NaN	NaN	NaN	NaN	NaN	NaN	NaN	0.0629258	-0.133238	0.0946506	0.133941	0.0726397	0.00105839	NaN	NaN	NaN	7.5533e-26	263490000	168930000	94557000	0	0	0	0	0	0	0	0	0	2	2	3	3	3	2	0	0	0	3	17.4	17.4	23.277	NaN	NaN
PRRC2A	Protein PRRC2A	P48634;P48634-4;P48634-2;P48634-3	P48634;P48634-4;P48634-2;P48634-3	0.135793	NaN	NaN	NaN	NaN	NaN	0.0716494	0.254771	NaN	NaN	NaN	-0.0388643	NaN	NaN	NaN	NaN	NaN	NaN	0.00011963	151580000	99111000	52464000	2	1	1	0	1	1	2	2	1	1	1	2	0	1	1	1	0	0	3	1.8	1.8	228.86	0	NaN
NES	Nestin	P48681	P48681	NaN	NaN	NaN	NaN	NaN	NaN	NaN	NaN	NaN	-0.793686	-1.09369	-1.15238	NaN	NaN	-1.0431	NaN	NaN	NaN	3.088e-07	52736000	24142000	28595000	0	0	0	0	0	0	0	0	0	1	2	2	1	1	2	0	0	0	2	1.5	1.5	177.44	NaN	NaN
ALDH9A1	4-trimethylaminobutyraldehyde dehydrogenase	P49189;P49189-2	P49189;P49189-2	0.491084	0.299676	0.519516	0.189897	0.279669	0.219648	-1.36366	-1.32947	-1.48367	-2.62018	-3.36491	-2.5768	-2.50813	-3.18707	-3.02492	-0.118426	-0.295029	-0.157086	4.8286e-76	1802600000	944430000	858210000	10	10	8	9	8	9	5	3	4	7	5	7	4	3	6	6	6	8	14	30.2	30.2	53.801	0	-0.271436
RPL34	60S ribosomal protein L34	P49207	P49207	-0.529125	-0.583075	-0.613783	-0.355345	-0.438447	-0.551427	-0.270149	-0.303285	-0.477015	-0.281097	-0.0972535	-0.13182	-0.298868	-0.318984	-0.279272	0.019828	0.0097242	0.0701522	9.2598e-131	42135000000	26845000000	15289000000	6	7	5	6	7	6	6	6	6	9	6	7	7	9	6	10	9	11	11	43.6	43.6	13.293	0	0.144628
NASP	Nuclear autoantigenic sperm protein	P49321;P49321-3;P49321-2;P49321-4;Q5T624;E9PRH9;H0YF33;H0YDS9;E9PI86;E9PPQ8;E9PPR5;E9PNB5	P49321;P49321-3;P49321-2;P49321-4;Q5T624;E9PRH9;H0YF33	NaN	NaN	NaN	0.370178	0.343706	0.0329883	-0.356802	0.0845221	NaN	0.101829	0.0971688	-0.095363	0.103829	0.062069	0.336844	NaN	NaN	NaN	4.6434e-63	467740000	299490000	168250000	1	1	1	2	3	4	2	2	1	5	5	7	5	6	5	0	1	1	9	16.2	16.2	85.237	NaN	NaN
FASN	Fatty acid synthase;[Acyl-carrier-protein] S-acetyltransferase;[Acyl-carrier-protein] S-malonyltransferase;3-oxoacyl-[acyl-carrier-protein] synthase;3-oxoacyl-[acyl-carrier-protein] reductase;3-hydroxyacyl-[acyl-carrier-protein] dehydratase;Enoyl-[acyl-carrier-protein] reductase;Oleoyl-[acyl-carrier-protein] hydrolase	P49327;J3KTF0	P49327	-0.330659	-0.370637	-0.237553	-0.297594	-0.334173	-0.342947	-0.280366	-0.285111	-0.215192	0.243333	0.275071	0.179178	0.298484	0.284038	0.234927	-0.422411	-0.50352	-0.49057	0	23359000000	9715400000	13643000000	50	40	37	49	32	34	47	30	46	56	50	53	56	56	56	35	27	33	80	41.1	41.1	273.42	0	-0.00351405
CCT3	T-complex protein 1 subunit gamma	P49368;B4DUR8;P49368-2;E9PRC8;Q5SZX6;E9PQ35;Q5SZX9;Q5SZW8;E9PM09	P49368;B4DUR8;P49368-2	-0.141048	-0.297813	-0.218099	0.048283	-0.256724	-0.127724	-0.0124756	0.0977232	0.0182148	-0.175521	-0.0427709	-0.00156018	-0.245155	0.00537221	-0.0450763	0.103157	0.248142	0.299547	7.1445e-199	2190600000	1327900000	862700000	10	3	7	11	7	6	9	3	5	13	12	20	11	10	10	4	2	2	24	54.5	54.5	60.533	0	0.0903748
TUFM	Elongation factor Tu, mitochondrial	P49411;H3BNU3	P49411	0.242811	NaN	NaN	0.159171	NaN	NaN	NaN	NaN	NaN	-0.225767	NaN	-0.103668	-0.148153	-0.0192466	-0.0481751	NaN	NaN	NaN	2.0836e-18	181690000	109150000	72540000	2	0	1	2	0	1	1	0	1	2	1	5	3	2	2	0	0	0	6	18.8	18.8	49.541	0	-0.0836407
AARS	Alanine--tRNA ligase, cytoplasmic	P49588;P49588-2;H3BPK7	P49588;P49588-2	0.68453	0.634937	0.582958	1.04637	1.06258	1.21046	0.953422	1.17655	0.628892	0.253961	0.0309501	0.258037	-0.03817	0.257165	0.0518394	NaN	NaN	NaN	1.7583e-38	385730000	260590000	125130000	2	3	2	4	3	2	3	3	5	4	3	7	3	5	3	0	1	0	9	12.8	12.8	106.81	0	0.427638
CARS	Cysteine--tRNA ligase, cytoplasmic	P49589-3;P49589-2;B4DKY1;P49589;E9PLP0	P49589-3;P49589-2;B4DKY1;P49589	0.0896018	-0.0152652	0.303792	-0.0401335	0.16698	0.0961647	0.0779745	-0.148303	0.0763859	0.0349524	0.171722	0.182777	0.414944	0.291596	0.13735	NaN	-0.0070312	-0.25052	4.3566e-66	630770000	397660000	233110000	5	3	3	3	3	4	2	2	2	6	5	7	7	5	6	0	2	2	11	15.2	15.2	94.637	0	0.00656297
SARS	Serine--tRNA ligase, cytoplasmic	P49591;Q5T5C7	P49591;Q5T5C7	NaN	NaN	NaN	NaN	NaN	NaN	NaN	NaN	NaN	0.213255	NaN	0.392218	0.31463	NaN	NaN	NaN	NaN	NaN	1.5481e-19	141650000	95671000	45978000	0	0	0	0	0	0	0	0	0	2	2	3	2	1	1	0	0	0	4	12.8	12.8	58.777	NaN	NaN
ACADVL	Very long-chain specific acyl-CoA dehydrogenase, mitochondrial	P49748-2;P49748;P49748-3;G3V1M7;J3QRJ8;K7EQP4;K7EJW8;J3KSR4;K7EMF8;J3KS89;J3QKU9	P49748-2;P49748;P49748-3	0.369971	0.803656	0.566403	0.905593	0.576055	0.729829	0.904637	1.06238	0.125833	0.485666	0.60169	0.380993	0.585271	0.421946	0.41856	NaN	-0.0235519	NaN	4.6509e-77	840750000	589530000	251220000	7	4	6	5	6	7	8	3	6	5	5	9	10	8	8	1	2	1	15	27.5	27.5	68.058	0	0.163426
RANBP2	E3 SUMO-protein ligase RanBP2;Putative peptidyl-prolyl cis-trans isomerase	P49792;F8WBP7	P49792	-1.03347	-0.360494	-0.428577	NaN	NaN	NaN	NaN	NaN	-1.09029	-0.277578	-0.0800537	-0.150647	0.0635753	-0.64712	0.0603645	NaN	-0.249479	NaN	4.2861e-21	241820000	126730000	115100000	2	2	2	0	1	0	0	1	2	4	5	5	3	4	6	0	2	0	4	3.2	3.2	358.2	0	NaN
GMPS	GMP synthase [glutamine-hydrolyzing]	P49915;P49915-2	P49915;P49915-2	0.0505087	0.0334704	-0.0350308	0.0872989	0.0427816	0.0712407	-0.156249	-0.0817735	-0.182139	-1.82561	-1.83709	-1.65203	-2.64616	-2.62492	-2.68128	-0.16295	-0.020123	-0.197695	1.245e-208	5310100000	2805500000	2504600000	22	19	16	23	18	24	20	14	21	16	14	17	17	15	15	16	12	17	31	62.8	62.8	76.715	0	0.0377703
GDI2	Rab GDP dissociation inhibitor beta	P50395;P50395-2;Q5SX87;Q5SX86;V9GYF8;Q5SX90;Q5SX91;P31150;V9GYJ7;G5E9U5	P50395;P50395-2;Q5SX87	NaN	NaN	-0.559507	NaN	NaN	0.399319	NaN	NaN	NaN	0.0961988	0.0320395	0.0611744	-0.0669258	-0.180439	0.0484433	NaN	NaN	NaN	2.6692e-103	1332900000	827620000	505290000	1	0	2	1	1	2	1	0	0	10	10	14	11	8	8	1	0	0	17	47.2	47.2	50.663	0	0.958826
SERPINH1	Serpin H1	P50454;E9PPV6;E9PKH2;E9PR70;E9PK86;E9PMI5;E9PJH8;E9PIG2;E9PRS3;E9PNX1;E9PQ34;H0YEP8;E9PLA6	P50454;E9PPV6;E9PKH2;E9PR70	NaN	NaN	NaN	-0.252511	NaN	-0.210354	NaN	NaN	-0.193644	-0.300802	-0.354456	-0.121884	-0.360259	-0.141253	-0.135625	-0.284533	NaN	-0.467249	3.714e-178	1678800000	1001000000	677880000	1	0	1	3	0	1	2	0	2	8	8	14	9	7	7	2	1	2	14	38.8	38.8	46.44	NaN	NaN
PDLIM4	PDZ and LIM domain protein 4	P50479;P50479-2;C9J542	P50479;P50479-2	NaN	NaN	NaN	NaN	NaN	NaN	NaN	NaN	NaN	0.767979	0.93182	0.387446	0.655716	0.948151	1.08703	NaN	NaN	NaN	6.8637e-35	276400000	198510000	77891000	0	1	0	0	0	1	0	0	0	4	4	4	5	3	5	0	0	0	5	23	23	35.398	NaN	NaN
ST13;ST13P5;ST13P4	Hsc70-interacting protein;Putative protein FAM10A5;Putative protein FAM10A4	Q3KNR6;P50502;Q8NFI4;H7C3I1;F6VDH7;Q8IZP2;A0A087X1H6;F8WAQ7	Q3KNR6;P50502;Q8NFI4;H7C3I1;F6VDH7;Q8IZP2;A0A087X1H6	NaN	NaN	NaN	NaN	NaN	NaN	NaN	NaN	NaN	-0.346975	-0.470983	-0.0451824	0.121449	0.0374645	-0.133311	NaN	NaN	NaN	1.0533e-17	154830000	88828000	66005000	1	0	1	1	0	0	1	1	1	3	3	4	3	3	2	0	0	0	5	24.6	24.6	23.911	NaN	NaN
VASP	Vasodilator-stimulated phosphoprotein	P50552;K7ENR7;K7ENL7;K7EIG8	P50552;K7ENR7;K7ENL7	NaN	NaN	NaN	NaN	NaN	NaN	NaN	NaN	NaN	NaN	-0.126707	0.107488	NaN	-0.0606748	NaN	NaN	NaN	NaN	2.6351e-12	75990000	44898000	31091000	0	0	0	0	0	0	0	0	0	1	2	3	1	2	1	0	0	0	3	9.5	9.5	39.829	NaN	NaN
CCT8	T-complex protein 1 subunit theta	P50990;P50990-2;P50990-3;H7C4C8;H7C2U0	P50990;P50990-2;P50990-3	0.247286	0.238217	0.22323	0.338171	0.284901	0.466552	0.502264	0.489977	0.430567	0.0508071	0.0355362	0.115499	0.0887706	0.172398	0.0196811	0.112278	0.125138	0.137893	0	13206000000	8602600000	4603100000	25	21	20	25	23	22	25	20	23	23	20	22	22	20	22	15	16	17	29	55.1	55.1	59.62	0	0.0999541
CCT4	T-complex protein 1 subunit delta	P50991;P50991-2	P50991;P50991-2	-0.0606733	NaN	0.198282	-0.22954	NaN	0.190803	0.0332331	NaN	-0.241925	-0.199356	-0.0381541	0.210899	-0.0867915	-0.195651	-0.0337512	-0.385398	NaN	-0.303113	3.61e-148	947420000	584690000	362730000	4	1	2	2	1	2	3	1	3	6	6	9	8	4	9	4	1	3	11	28	28	57.924	0	-0.0881725
ANXA11	Annexin A11	P50995-2;P50995;H0Y6E1	P50995-2;P50995;H0Y6E1	NaN	NaN	NaN	NaN	NaN	-0.0599921	NaN	NaN	NaN	0.134246	NaN	NaN	-0.156638	NaN	-1.10921	NaN	NaN	NaN	3.4143e-17	128590000	71020000	57570000	0	0	0	0	1	3	2	0	0	2	1	2	3	1	3	0	0	0	6	15.5	15.5	51.242	NaN	NaN
RAB5C;RAB5B;RAB5A	Ras-related protein Rab-5C;Ras-related protein Rab-5B;Ras-related protein Rab-5A	P51148;P51148-2;F8VWU4;F8VVZ0;F8VUA5;F8VVK3;K7ERI8;P61020-2;P20339-2;P61020;P20339;K7ERQ8;K7EIP6;F8WCY6;F8WD79;F8VPW9;F8VSF8;F8VWZ7;K7ENY4	P51148;P51148-2;F8VWU4;F8VVZ0;F8VUA5;F8VVK3;K7ERI8;P61020-2;P20339-2;P61020;P20339;K7ERQ8	NaN	NaN	NaN	NaN	NaN	NaN	NaN	0.28686	-0.0471738	NaN	-0.445343	-0.412427	-2.70885	-0.564362	NaN	NaN	NaN	NaN	4.0937e-12	230090000	115240000	114850000	1	1	1	1	1	0	1	2	2	1	2	2	2	2	1	0	0	0	4	21.3	21.3	23.482	NaN	NaN
PSMD7	26S proteasome non-ATPase regulatory subunit 7	P51665;H3BNT7;H3BTM8	P51665	0.255478	0.256073	0.220373	0.354381	0.342307	0.343952	0.287785	0.395947	0.453117	-0.0973611	0.132768	0.0355336	-0.107564	0.0249805	-0.175285	-0.270042	-0.047183	-0.270444	3.0168e-105	1465500000	937200000	528250000	4	5	6	4	6	6	5	6	5	7	6	7	5	6	6	3	2	4	9	32.1	32.1	37.025	0	0.0884741
RPS6KA3	Ribosomal protein S6 kinase alpha-3	P51812;B1AXG1;Q9UK32-2;Q9UK32;B1AXG2	P51812	0.300858	0.504405	NaN	0.349558	0.417627	0.76554	0.413483	NaN	0.255678	-0.266821	-0.683038	-0.667122	-1.36125	-0.803607	-1.50816	0.152672	0.0816925	0.171497	3.7124e-54	462610000	274460000	188150000	3	4	2	5	4	5	4	1	3	3	4	2	3	2	2	2	2	2	9	24.1	15.4	83.735	0	0.0149957
HDGF	Hepatoma-derived growth factor	P51858;P51858-2;P51858-3	P51858;P51858-2;P51858-3	NaN	NaN	NaN	NaN	NaN	NaN	NaN	NaN	NaN	NaN	-0.395993	-0.377903	0.0373601	NaN	-0.381412	NaN	NaN	NaN	2.2308e-23	134440000	80154000	54290000	0	0	0	0	0	0	0	0	0	1	2	4	2	1	2	0	0	0	4	21.2	21.2	26.788	NaN	NaN
PGD	6-phosphogluconate dehydrogenase, decarboxylating	P52209-2;P52209;K7EM49;K7EMN2;K7EPF6;K7ELN9	P52209-2;P52209;K7EM49;K7EMN2;K7EPF6	0.52407	0.327203	0.152125	0.539314	0.433667	0.449173	0.0580025	0.0205906	0.0435204	-0.224232	-0.138111	-0.0372678	-0.314522	-0.368809	-0.399052	0.0623334	0.17752	0.0420533	1.9348e-181	2064500000	1150900000	913640000	8	8	5	8	6	9	9	4	8	12	9	9	12	9	11	4	3	4	16	42.6	42.6	51.872	0	0.12197
KPNA2	Importin subunit alpha-1	P52292;J3QLL0;J3KS65	P52292	NaN	NaN	NaN	NaN	NaN	NaN	NaN	NaN	NaN	-0.132136	0.132901	-0.0556595	0.0415093	0.0554475	0.0555182	-0.391117	NaN	NaN	5.889e-33	420270000	241390000	178890000	1	0	1	1	1	1	1	0	1	2	4	9	3	3	4	2	0	1	10	26.5	26.5	57.861	NaN	NaN
RAP1GDS1	Rap1 GTPase-GDP dissociation stimulator 1	P52306-4;P52306;P52306-5;D6RHH8;P52306-6;P52306-2;P52306-3	P52306-4;P52306;P52306-5;D6RHH8;P52306-6;P52306-2;P52306-3	NaN	NaN	NaN	NaN	NaN	NaN	NaN	NaN	NaN	0.260455	-0.041265	0.108385	NaN	NaN	0.01334	NaN	NaN	NaN	4.8245e-09	46466000	30728000	15738000	0	0	0	0	0	0	0	1	0	2	2	2	1	1	2	0	0	0	2	4.1	4.1	66.316	NaN	NaN
HNRNPF	Heterogeneous nuclear ribonucleoprotein F;Heterogeneous nuclear ribonucleoprotein F, N-terminally processed	P52597	P52597	0.197238	0.105607	0.113185	-0.0755012	-0.00562897	-0.076281	-0.180682	-0.0938406	0.0639542	0.00188276	-0.104888	-0.126968	0.0533867	-0.123018	0.016788	0.0242715	-0.0975186	-0.0162509	3.5924e-239	6412400000	4021500000	2390900000	11	10	11	12	11	13	12	9	9	12	8	12	11	9	12	9	8	11	14	58.1	58.1	45.671	0	-0.188686
MSH6	DNA mismatch repair protein Msh6	P52701-4;P52701-3;P52701;A0A087WWJ1;P52701-2;A0A087WYT6	P52701-4;P52701-3;P52701;A0A087WWJ1;P52701-2	NaN	0.00716771	NaN	NaN	NaN	NaN	NaN	0.0896533	NaN	-0.384744	-0.379514	-0.0597842	-1.77883	-1.10329	-0.180569	NaN	NaN	NaN	1.2135e-26	284890000	155430000	129460000	0	2	1	0	1	1	1	2	1	5	2	3	3	7	4	0	0	0	8	9.3	9.3	119.79	0	NaN
KIF11	Kinesin-like protein KIF11	P52732	P52732	NaN	NaN	NaN	NaN	NaN	NaN	NaN	NaN	NaN	0.26103	0.408222	0.393277	0.679448	0.507255	0.518194	NaN	NaN	NaN	1.8062e-11	57430000	39671000	17759000	0	0	0	0	0	0	0	0	0	2	2	2	3	2	2	0	0	0	3	3.3	3.3	119.16	NaN	NaN
PLK1	Serine/threonine-protein kinase PLK1	P53350;I3L387	P53350	0.412259	0.810424	1.09793	0.609713	1.06962	0.630754	NaN	0.352786	0.404391	-0.477382	-0.422931	-0.317613	-0.408881	-0.645884	-0.365239	NaN	NaN	NaN	3.4695e-17	246740000	156090000	90646000	3	2	3	3	3	3	0	2	3	2	2	2	2	2	3	0	1	1	7	15.9	15.9	68.254	0	-0.179671
ACLY	ATP-citrate synthase	P53396;P53396-2;P53396-3;K7ESG8;K7EIE7	P53396;P53396-2;P53396-3	0.71205	0.542507	0.646153	0.551018	0.658364	0.684963	0.68522	0.815949	0.586977	0.28722	0.288057	0.31212	0.386736	0.523413	0.30287	0.0781113	-0.114133	-0.0843088	2.758e-248	3627700000	2193700000	1434000000	19	15	10	19	12	12	15	11	12	17	16	24	22	15	19	7	5	7	36	40.6	40.6	120.84	0	0.0122117
MVD	Diphosphomevalonate decarboxylase	P53602;H3BP35;H3BQ47;A0A087WV85;H3BRZ1;H3BVC4	P53602;H3BP35	-0.537982	-0.693181	-0.855645	-0.949189	-0.902502	-1.00211	-0.0518361	-0.901523	-0.659005	0.294702	0.415829	0.219053	0.312726	0.282054	0.278539	-0.713239	-0.722778	-0.625379	2.3316e-89	1422500000	908220000	514290000	4	3	3	4	3	4	2	3	4	7	6	6	7	4	6	5	4	4	13	45.8	45.8	43.404	0	-0.256008
COPB1	Coatomer subunit beta	P53618;E9PP73;E9PP63;E9PKQ1	P53618;E9PP73	-0.163217	NaN	0.318762	0.306286	-0.0918421	NaN	0.310766	NaN	NaN	0.139999	0.288352	0.0453539	0.370224	0.130948	0.15615	NaN	NaN	NaN	1.4282e-35	583590000	366790000	216800000	5	1	2	6	3	1	5	0	0	5	5	5	8	3	4	1	0	1	10	12.6	12.6	107.14	0	0.0294492
COPA	Coatomer subunit alpha;Xenin;Proxenin	P53621;P53621-2	P53621;P53621-2	NaN	NaN	NaN	NaN	NaN	NaN	NaN	NaN	NaN	0.636804	0.72204	0.463079	0.0787453	0.49942	0.131166	NaN	NaN	NaN	5.5968e-18	174320000	117880000	56438000	0	0	0	1	0	0	1	0	1	3	2	4	2	3	2	0	0	0	6	6	6	138.34	NaN	NaN
RARS	Arginine--tRNA ligase, cytoplasmic	P54136;P54136-2;E5RH09;E5RJM9	P54136;P54136-2	0.010452	-0.00821569	0.168414	-0.0419826	0.297047	-0.309766	-0.0666639	-0.0911438	-0.0496175	0.0577347	0.14729	0.095679	0.117703	0.346698	0.253727	0.139419	-0.0674219	0.0375795	1.1506e-91	1629100000	1060100000	568980000	10	5	5	8	6	6	6	4	4	12	10	14	17	10	15	4	4	3	19	32.6	32.6	75.378	0	-0.0524346
YARS	Tyrosine--tRNA ligase, cytoplasmic;Tyrosine--tRNA ligase, cytoplasmic, N-terminally processed	P54577;A0A0C4DGZ5	P54577;A0A0C4DGZ5	NaN	NaN	NaN	-0.31937	NaN	NaN	NaN	NaN	NaN	0.241927	0.406359	0.424086	-0.166386	0.0521194	0.201511	NaN	NaN	NaN	6.7126e-38	330150000	206420000	123730000	0	1	1	2	0	1	1	0	0	7	4	5	6	3	3	0	1	1	10	20.1	20.1	59.143	NaN	NaN
ALDH18A1	Delta-1-pyrroline-5-carboxylate synthase;Glutamate 5-kinase;Gamma-glutamyl phosphate reductase	P54886-2;P54886	P54886-2;P54886	-0.383926	-0.29653	-0.194638	-0.068629	-0.142615	-0.183173	0.0234817	0.0767075	-0.0230569	-0.46804	-0.736883	-0.553681	-0.148286	-0.661049	-0.727689	-0.497664	NaN	-0.23182	2.0845e-66	815540000	461810000	353730000	6	5	4	7	9	6	7	7	7	7	5	8	6	6	6	4	1	4	15	19.9	19.9	87.088	0	0.153915
CSE1L	Exportin-2	P55060-3;P55060;P55060-4;P55060-2	P55060-3;P55060;P55060-4	-0.183737	-0.0613374	-0.0492465	0.0192552	-0.0298733	-0.223865	0.226488	0.095448	0.0656752	0.0298351	0.167145	0.113105	0.17321	0.107353	0.096278	-0.311068	0.185391	0.278752	9.4587e-238	1928700000	1230900000	697840000	8	3	5	7	3	4	5	4	3	15	10	13	12	8	13	5	4	4	18	22.9	22.9	107.78	0	0.0314641
VCP	Transitional endoplasmic reticulum ATPase	P55072;C9JUP7;C9IZA5	P55072	0.00246874	-0.0214055	-0.151262	0.195568	0.160061	0.285515	0.18055	0.248882	0.15593	0.104435	0.0827301	0.242717	0.183481	-0.0275411	0.297139	-0.221113	-0.557038	0.145043	8.8095e-146	2074500000	1285600000	788940000	8	7	7	7	6	8	5	4	6	12	11	11	12	12	10	3	2	3	19	28.5	28.5	89.321	0	0.216973
HADHB	Trifunctional enzyme subunit beta, mitochondrial;3-ketoacyl-CoA thiolase	P55084-2;P55084;F5GZQ3;B5MD38;C9JEY0;C9JE81;C9K0M0	P55084-2;P55084;F5GZQ3;B5MD38	0.875114	0.974225	0.82435	1.24764	1.10087	1.11076	1.31741	1.15455	1.06641	0.125067	0.146378	0.0914868	-0.406081	-0.463176	-0.505291	0.0202951	0.0311709	0.0318312	0	25455000000	17732000000	7723400000	18	21	22	23	22	24	23	20	22	21	22	21	19	19	20	24	19	18	25	66.6	66.6	48.879	0	0.235645
EIF3B	Eukaryotic translation initiation factor 3 subunit B	P55884;P55884-2;C9JQN7;C9JZG1	P55884;P55884-2	NaN	NaN	NaN	NaN	NaN	NaN	0.299882	0.783811	0.485868	0.194134	0.185899	-0.126634	0.0143187	0.246403	0.33962	NaN	NaN	0.724722	2.4012e-23	333880000	215660000	118210000	0	1	0	0	0	0	2	2	4	3	3	6	4	8	3	1	0	2	8	9.6	9.6	92.48	NaN	NaN
MARS	Methionine--tRNA ligase, cytoplasmic	P56192-2;P56192;F5H2V6	P56192-2;P56192;F5H2V6	NaN	NaN	NaN	NaN	NaN	NaN	NaN	NaN	NaN	0.176347	NaN	0.266369	NaN	NaN	NaN	NaN	NaN	NaN	3.6382e-07	23179000	15263000	7916500	0	0	0	0	0	0	0	0	0	2	0	2	1	0	0	0	0	0	2	3.5	3.5	61.815	NaN	NaN
EIF6	Eukaryotic translation initiation factor 6	P56537;B7ZBH1;P56537-2	P56537;B7ZBH1	0.0323953	NaN	NaN	NaN	NaN	NaN	NaN	NaN	NaN	0.137189	0.491291	-0.083969	0.323859	0.072756	0.122242	NaN	NaN	NaN	1.02e-23	767750000	610490000	157270000	1	1	1	1	1	1	1	1	1	3	3	3	3	2	3	1	0	0	3	17.1	17.1	26.599	0	NaN
TPI1	Triosephosphate isomerase	P60174-1;P60174;P60174-4;U3KPZ0;U3KQF3;U3KPS5	P60174-1;P60174;P60174-4;U3KPZ0	-0.334601	-0.488239	-0.274072	-0.0867777	-0.202105	-0.113062	-0.00988164	-0.161938	-0.170411	-0.174357	-0.153678	-0.0630008	-0.164784	-0.198761	-0.25352	-0.0965942	0.0720825	-0.00581762	4.2901e-243	4298000000	2577300000	1720700000	8	7	6	6	7	7	6	5	7	9	8	12	11	8	8	4	2	5	14	70.3	70.3	26.669	0	0.221539
EIF3E	Eukaryotic translation initiation factor 3 subunit E	P60228;E5RIT4;H0YBR5;E5RGA2;E5RHS5	P60228;E5RIT4;H0YBR5;E5RGA2	NaN	NaN	NaN	NaN	NaN	NaN	NaN	NaN	NaN	0.519209	-0.031367	0.077582	0.37771	0.011043	0.0875669	NaN	NaN	NaN	1.3696e-16	125060000	81441000	43619000	0	0	0	0	0	0	0	1	1	2	2	3	3	2	2	0	0	0	4	9.2	9.2	52.22	NaN	NaN
SEC61B	Protein transport protein Sec61 subunit beta	P60468;S4R3B5	P60468	-0.0456466	NaN	0.126361	NaN	0.159661	NaN	NaN	NaN	NaN	0.0772517	0.0392155	-0.0795436	-0.0700454	0.191082	0.142304	NaN	0.0023872	NaN	5.908e-15	310590000	201300000	109290000	2	1	2	1	2	1	1	1	0	2	2	2	2	2	2	1	2	1	3	37.5	37.5	9.9743	0	0.119304
ACTB	Actin, cytoplasmic 1;Actin, cytoplasmic 1, N-terminally processed	P60709;G5E9R0;E7EVS6;C9JZR7;C9JUM1;C9JTX5;Q6S8J3;P63267-2;A5A3E0;P0CG38;P0CG39;F8WCH0;Q9BYX7	P60709;G5E9R0;E7EVS6	-0.565074	-0.479016	-0.491329	-0.394186	-0.42337	-0.40398	-0.357115	-0.333903	-0.396934	-0.231676	-0.188001	-0.32733	-0.291134	-0.221342	-0.174371	-0.161999	-0.092025	-0.119418	0	76208000000	45858000000	30350000000	20	17	18	20	17	19	17	16	18	16	14	17	16	15	15	19	14	16	1	74.7	74.7	41.736	0	0.0873494
EIF4A1;EIF4A2	Eukaryotic initiation factor 4A-I;Eukaryotic initiation factor 4A-II	P60842;J3KT12;P60842-2;J3KTB5;J3QS69;J3QL43;J3QLN6;J3QR64;E7EQG2;Q14240;Q14240-2;J3QKZ9;J3KS25;J3KSZ0;J3KTN0;J3KT04;J3KS93;J3KSN7;J3QL52;J3QQP0;E7EMV8;E9PBH4;F8WE11;I3L3H2	P60842;J3KT12;P60842-2;J3KTB5;J3QS69;J3QL43;J3QLN6;J3QR64;E7EQG2;Q14240;Q14240-2	-0.205978	-0.236134	-0.17329	-0.0662983	-0.219926	0.0588979	-0.0631066	0.0293969	-0.0582788	-0.174133	0.00960083	-0.0906061	0.00272795	-0.0989349	-0.0906012	-0.00692176	NaN	0.0922994	2.1797e-131	1565600000	933460000	632170000	8	6	6	7	5	7	5	5	5	11	7	11	10	7	10	4	1	2	12	43.3	43.3	46.153	0	0.139679
RPS20	40S ribosomal protein S20	P60866;P60866-2;E5RJX2;E5RIP1;G3XAN0	P60866;P60866-2;E5RJX2	NaN	-0.470499	-0.55747	-0.413597	-0.352498	-0.708148	-0.39919	-0.457321	-0.699483	-0.470687	-0.244979	-0.449062	-0.452583	-0.640593	-0.513412	NaN	NaN	NaN	1.9719e-11	403470000	230680000	172790000	1	2	2	2	2	2	2	2	2	2	3	3	3	3	2	1	1	1	3	25.2	25.2	13.373	0	0.100387
ABCE1	ATP-binding cassette sub-family E member 1	P61221;D6R9I9;H0Y990;D6RGF4	P61221;D6R9I9	NaN	NaN	NaN	NaN	NaN	NaN	NaN	NaN	NaN	0.872229	0.516818	0.759861	0.554995	0.493026	0.886382	NaN	NaN	NaN	1.5112e-27	258400000	189650000	68756000	1	0	1	1	1	1	0	0	0	3	3	4	5	4	2	1	1	0	6	13.5	13.5	67.314	NaN	NaN
RPS3A	40S ribosomal protein S3a	P61247;H0Y8L7;E9PFI5;H0Y9Y4;D6RG13;D6RAT0;D6RB09;D6R9B6;D6RAS7;D6RED7;D6RI02;D6RGE0	P61247;H0Y8L7;E9PFI5;H0Y9Y4;D6RG13;D6RAT0;D6RB09;D6R9B6;D6RAS7	-0.33049	NaN	NaN	-0.345444	NaN	NaN	NaN	NaN	NaN	-0.298976	-0.278639	-0.197006	-0.265082	-0.195241	-0.14575	0.2156	0.177641	0.64369	9.0703e-30	685820000	410130000	275690000	3	1	0	3	0	0	1	0	1	6	7	7	8	5	7	4	2	3	10	36.4	36.4	29.945	0	-0.0149544
RPL15	60S ribosomal protein L15;Ribosomal protein L15	P61313;E7EQV9;E7ENU7;E7EX53;P61313-2;E7ERA2	P61313;E7EQV9;E7ENU7;E7EX53	-0.49189	-0.581046	-0.611721	-0.337429	-0.302591	-0.50507	-0.255368	-0.281307	-0.395215	-0.311329	-0.271593	-0.125275	-0.329726	-0.433152	-0.461741	-0.0293248	0.0129513	0.122726	0	42433000000	24710000000	17723000000	10	11	11	12	12	12	12	11	11	11	11	11	11	12	10	13	13	15	16	53.4	53.4	24.146	0	0.243617
RHOA;RHOC	Transforming protein RhoA;Rho-related GTP-binding protein RhoC	P61586;Q5JR08;P08134;E9PLA2;C9JRM1;Q5JR06;Q5JR07;E9PN11;C9JNR4;E9PQH6;C9JX21;Q5JR05;U3KQA9;U3KQV3	P61586;Q5JR08;P08134	NaN	NaN	NaN	NaN	NaN	NaN	NaN	NaN	NaN	-0.00188276	-0.250427	0.205759	-0.169272	-0.157377	0.102825	NaN	NaN	NaN	8.1428e-10	182380000	114750000	67634000	0	1	0	1	1	1	0	1	0	2	2	3	3	2	2	0	0	0	3	16.1	16.1	21.768	NaN	NaN
HNRNPK	Heterogeneous nuclear ribonucleoprotein K	P61978-3;P61978;P61978-2;Q5T6W2;S4R457;S4R359	P61978-3;P61978;P61978-2;Q5T6W2	0.0938202	0.0954984	-0.247905	-0.0138673	-0.00763293	0.0313215	0.0455281	0.0301894	0.0913652	0.0366882	0.0626545	0.0138827	0.150986	0.138413	0.146456	0.0250622	-0.0305324	-0.0338092	1.5872e-258	3804700000	2432300000	1372400000	10	13	10	10	10	10	12	11	9	12	10	13	15	13	14	7	5	7	16	39.1	39.1	48.562	0	-0.101453
YWHAG	14-3-3 protein gamma;14-3-3 protein gamma, N-terminally processed	P61981	P61981	NaN	NaN	NaN	NaN	NaN	NaN	NaN	NaN	NaN	NaN	-0.303291	-0.0681474	-0.203739	NaN	-0.211465	NaN	NaN	NaN	1.3741e-98	117740000	72040000	45698000	1	0	1	0	0	0	0	0	0	1	1	2	2	1	2	1	0	0	3	28.3	17.4	28.302	NaN	NaN
PPP1CA;PPP1CC	Serine/threonine-protein phosphatase PP1-alpha catalytic subunit;Serine/threonine-protein phosphatase;Serine/threonine-protein phosphatase PP1-gamma catalytic subunit	P62136;E9PMD7;P62136-2;F8VR82;P62136-3;F8VYE8;P36873;F8W0W8;P36873-2;E7ETD8;F8WE71;H0Y3Y6;A0A087WYY5;F5H1L6;F5H037	P62136;E9PMD7;P62136-2;F8VR82;P62136-3;F8VYE8;P36873;F8W0W8;P36873-2	NaN	NaN	NaN	NaN	NaN	NaN	NaN	NaN	NaN	-0.0963213	-0.170802	-0.397413	0.0975725	0.0441178	-0.226645	NaN	NaN	NaN	1.1795e-13	279490000	160140000	119340000	0	1	0	0	1	1	1	0	0	2	3	4	3	2	3	0	0	0	2	16.4	16.4	37.512	NaN	NaN
RPS8	40S ribosomal protein S8	P62241;Q5JR95	P62241;Q5JR95	-0.435364	-0.539397	-0.713678	-0.246499	-0.357436	-0.679162	-0.177978	-0.222906	-0.851597	-0.332477	-0.217803	-0.356257	-0.437299	-0.170944	-0.505067	0.152704	0.0166856	0.0477241	3.5064e-157	1080200000	630800000	449430000	5	5	4	6	4	3	5	5	3	5	7	8	6	4	5	6	2	2	11	47.6	47.6	24.205	0	0.181961
YWHAE	14-3-3 protein epsilon	P62258;P62258-2;B4DJF2;I3L3T1;K7EIT4;K7EM20;I3L0W5	P62258;P62258-2	-0.367734	-0.498519	-0.404997	0.026726	-0.272655	-0.315786	0.0437792	0.181984	-0.253236	0.044851	0.0350644	0.0110746	-0.047781	0.0696198	0.0360231	-0.00706508	NaN	-0.0183782	6.5739e-66	3297700000	2074900000	1222800000	4	3	3	6	4	5	4	2	3	8	8	11	7	4	7	5	1	4	11	51.4	51.4	29.174	0	0.132342
RPS23	40S ribosomal protein S23	P62266;D6RD47;D6RDJ2;D6RIX0;D6R9I7	P62266;D6RD47	NaN	NaN	-0.08378	NaN	-0.546889	NaN	NaN	-0.475737	NaN	-0.2189	-0.304174	-0.0159649	-0.395366	-0.79554	NaN	NaN	NaN	NaN	4.7594e-31	224860000	142860000	82008000	0	1	3	1	2	1	2	2	1	2	3	3	3	2	0	0	1	0	5	42.7	42.7	15.807	0	-0.463109
RPL7A	60S ribosomal protein L7a	P62424;Q5T8U3;Q5T8U2	P62424;Q5T8U3	-0.387702	-0.513111	-0.685395	-0.194854	-0.414707	-0.511055	-0.353986	-0.46661	-0.30643	-0.390424	-0.315645	-0.181833	-0.310416	-0.420218	-0.5532	0.143484	0.121604	0.0813287	2.1943e-26	697240000	397320000	299930000	2	4	4	4	3	4	3	3	2	5	4	4	4	4	4	3	2	4	7	30.1	30.1	29.995	0	0.0984044
RPS4X;RPS4Y1	40S ribosomal protein S4, X isoform;40S ribosomal protein S4, Y isoform 1	P62701;C9JEH7;P22090;Q8TD47	P62701;C9JEH7;P22090	-0.528935	-0.471326	-0.799169	-0.35436	-0.198504	-0.339434	-0.245966	-0.158026	-0.30935	-0.154355	-0.0313908	-0.1619	-0.145837	-0.181975	-0.22037	-0.0777584	NaN	NaN	1.2349e-81	1054700000	620490000	434220000	6	3	5	8	4	5	4	2	4	8	7	11	9	8	9	2	1	0	12	44.1	44.1	29.597	0	0.189501
RPS6	40S ribosomal protein S6	P62753;A2A3R5;A2A3R7	P62753;A2A3R5	-0.615772	-0.847639	-0.387922	-0.220588	-0.416113	-0.376758	-0.342887	0.261029	NaN	-0.061485	-0.0028798	0.317233	-0.0182296	-0.0658597	-0.0577878	0.260796	NaN	NaN	1.2998e-54	1035400000	627210000	408160000	4	3	3	3	2	3	2	2	1	5	5	5	5	4	6	2	1	1	7	28.9	28.9	28.68	0	0.239014
HIST1H4A	Histone H4	P62805	P62805	-0.833316	-1.08628	-1.42969	-0.370478	-0.759565	-0.440301	-0.506267	-0.325461	-0.61477	-0.664043	-0.941564	-0.787609	-0.457249	-0.538468	-0.667026	-0.152084	0.68945	0.563918	3.4762e-26	881060000	474490000	406570000	3	4	4	5	3	4	4	3	3	4	5	4	4	4	4	2	2	2	6	57.3	57.3	11.367	0	0.645977
RPS25	40S ribosomal protein S25	P62851	P62851	-0.134239	-0.480249	NaN	-0.378411	-0.294114	-0.365335	-0.109687	-0.304705	-0.343122	-0.157803	-0.317979	-0.330913	-0.236776	-0.182218	-0.240638	0.538029	NaN	NaN	5.3853e-16	692730000	410950000	281790000	2	3	1	3	3	2	3	3	3	2	2	3	2	2	2	2	1	1	4	28	28	13.742	0	-0.0580908
RPS26;RPS26P11	40S ribosomal protein S26;Putative 40S ribosomal protein S26-like 1	P62854;Q5JNZ5	P62854;Q5JNZ5	-0.458883	NaN	NaN	-0.26786	-0.861334	-0.516383	-0.198237	NaN	-0.253606	-0.463703	-0.220612	-0.288958	-0.362553	-0.494609	-0.500456	0.0673925	0.379346	0.123374	6.359e-26	1198500000	718520000	480030000	2	1	1	2	2	2	2	0	2	3	3	3	3	3	3	2	3	2	3	31.3	31.3	13.015	0	-0.0575001
RPS28	40S ribosomal protein S28	P62857	P62857	NaN	NaN	NaN	NaN	NaN	NaN	NaN	NaN	NaN	-0.633319	-0.63013	-0.436774	NaN	NaN	-0.700275	NaN	NaN	NaN	1.0526e-30	168090000	96582000	71509000	0	0	0	0	0	0	0	0	0	2	2	2	1	1	2	0	0	0	2	30.4	30.4	7.8409	NaN	NaN
RPL39P5;RPL39	Putative 60S ribosomal protein L39-like 5;60S ribosomal protein L39	Q59GN2;P62891	Q59GN2;P62891	-0.252194	-0.309723	-0.289687	-0.0659545	-0.103697	-0.0344761	0.055039	0.00100664	-0.128772	-0.224643	-0.398016	-0.24278	-0.291784	-0.401632	-0.334837	0.172035	NaN	NaN	2.8391e-76	10557000000	6351400000	4205700000	3	2	2	3	2	3	2	2	2	3	3	3	3	3	3	2	1	1	3	23.5	23.5	6.3225	0	0.223733
RPL31	60S ribosomal protein L31	P62899;H7C2W9;C9JU56;B7Z4E3;P62899-3;P62899-2;B7Z4C8;B8ZZK4	P62899;H7C2W9;C9JU56;B7Z4E3;P62899-3;P62899-2;B7Z4C8;B8ZZK4	-0.541354	-0.5729	-0.474061	-0.308824	-0.400465	-0.519149	-0.236642	-0.346826	-0.320076	-0.280889	-0.2782	-0.245241	-0.340821	-0.368552	-0.404438	-0.00758065	0.0490452	0.0179656	1.714e-85	6074800000	3607600000	2467200000	3	4	5	4	5	4	5	4	4	5	5	5	5	4	4	4	4	3	7	52	52	14.463	0	0.140889
RPL10A	60S ribosomal protein L10a	P62906	P62906	-0.538527	NaN	NaN	NaN	NaN	NaN	NaN	NaN	-0.584796	-0.622525	0.212542	-0.0146004	-0.457957	NaN	-0.586839	0.0381575	NaN	NaN	2.3096e-13	212780000	126150000	86637000	2	1	1	1	0	1	1	1	2	2	2	4	2	2	3	2	0	1	4	19.4	19.4	24.831	0	NaN
RPL11	60S ribosomal protein L11	P62913;P62913-2;Q5VVC9;Q5VVC8	P62913;P62913-2	-0.211143	NaN	-0.658953	NaN	NaN	-0.059719	NaN	NaN	NaN	NaN	-0.0817945	-0.160783	NaN	-0.116608	-0.268069	NaN	NaN	NaN	4.5272e-44	259660000	156740000	102920000	2	1	2	1	1	2	1	0	1	2	2	3	1	2	2	0	0	1	3	19.7	19.7	20.252	0	0.375329
PPIA	Peptidyl-prolyl cis-trans isomerase A;Peptidyl-prolyl cis-trans isomerase A, N-terminally processed;Peptidyl-prolyl cis-trans isomerase	P62937;P62937-2;F8WE65;C9J5S7;E5RIZ5;Q9Y536;P0DN26;F5H284;A0A0H2UH34;A0A0B4J2A2;A0A075B767;A0A075B759;P0DN37	P62937;P62937-2;F8WE65;C9J5S7	-0.29814	-0.243705	-0.187503	-0.0604919	-0.0808021	-0.0974757	-0.197785	-0.039453	-0.121011	-0.0102128	-0.0810618	0.0894921	0.0369671	0.067417	0.0342072	-0.0694417	0.0405775	0.0451458	3.6337e-151	4158100000	2628500000	1529600000	8	7	5	6	5	8	6	5	7	9	8	11	8	8	9	5	4	5	11	53.3	53.3	18.012	0	0.162903
RPS27A;UBB;UBC;UBA52	Ubiquitin-40S ribosomal protein S27a;Ubiquitin;40S ribosomal protein S27a;Ubiquitin-60S ribosomal protein L40;Ubiquitin;60S ribosomal protein L40;Polyubiquitin-B;Ubiquitin;Polyubiquitin-C;Ubiquitin	P62979;J3QS39;J3QTR3;F5H6Q2;P62987;F5GYU3;F5H2Z3;F5H265;B4DV12;F5H388;F5H747;F5GXK7;J3QKN0;Q5PY61;P0CG47;Q96C32;P0CG48;M0R1V7;J3QSA3;F5GZ39;M0R1M6;M0R2S1	P62979;J3QS39;J3QTR3;F5H6Q2;P62987;F5GYU3;F5H2Z3;F5H265;B4DV12;F5H388;F5H747;F5GXK7;J3QKN0;Q5PY61;P0CG47;Q96C32;P0CG48;M0R1V7;J3QSA3;F5GZ39;M0R1M6;M0R2S1	1.00171	0.867527	0.797757	1.1657	1.20059	0.894085	1.38046	1.02316	1.28348	0.541547	0.7907	0.738649	0.830571	0.832891	0.594343	0.13755	0.0435423	0.240826	3.8925e-101	2616800000	1911300000	705460000	3	3	3	3	3	4	3	3	3	5	6	5	5	5	5	2	3	4	6	43.6	43.6	17.965	0	0.298175
RAC1;RAC3;RAC2	Ras-related C3 botulinum toxin substrate 1;Ras-related C3 botulinum toxin substrate 3;Ras-related C3 botulinum toxin substrate 2	P63000;P63000-2;P60763;P15153;J3KSC4;J3QLK0;B1AH77;B1AH78;B1AH80	P63000;P63000-2;P60763;P15153;J3KSC4;J3QLK0;B1AH77;B1AH78;B1AH80	NaN	NaN	-0.268617	-0.599738	-0.0159485	NaN	NaN	NaN	NaN	0.42493	0.0831406	0.376055	0.498657	0.398402	0.383148	0.451117	NaN	0.287923	2.2103e-13	356160000	237530000	118630000	1	1	3	3	3	2	1	1	0	4	4	2	3	4	2	2	0	2	3	22.4	22.4	21.45	0	-0.0392259
YWHAZ	14-3-3 protein zeta/delta	P63104;E7EX29;B0AZS6;E7ESK7;P63104-2;B7Z2E6;H0YB80;E5RGE1;E5RIR4;E9PD24;E7EVZ2	P63104;E7EX29;B0AZS6;E7ESK7;P63104-2	-0.237237	-0.296624	-0.324608	-0.125919	-0.288593	-0.214306	-0.0193702	-0.11029	-0.193849	-0.165079	-0.039946	-0.0353648	-0.0994449	-0.221247	-0.0798795	-0.0391929	0.124061	0.0305204	0	3083000000	1926100000	1156800000	3	2	4	4	5	5	3	3	4	8	7	8	7	5	8	4	2	3	8	53.9	42.9	27.745	0	0.0823172
DYNLL1;DYNLL2	Dynein light chain 1, cytoplasmic;Dynein light chain 2, cytoplasmic	P63167;Q96FJ2;F8VXI7;F8VXL2;F8VRV5	P63167;Q96FJ2	0.3295	0.478739	NaN	0.0428965	NaN	0.193079	NaN	NaN	NaN	0.181039	-0.0540619	0.0698055	0.356426	0.219314	0.130587	NaN	NaN	NaN	7.9266e-20	622180000	394280000	227900000	2	2	1	2	1	2	1	1	1	3	2	2	2	2	2	0	0	0	3	49.4	49.4	10.366	0	-0.286132
GNB2L1	Guanine nucleotide-binding protein subunit beta-2-like 1	P63244;J3KPE3;H0Y8W2;H0YAF8;D6R9Z1;H0YAM7;D6R9L0;D6RFX4;D6RHH4;D6RAC2;D6REE5;H0Y8R5;D6RFZ9;D6RF23;D6RAU2;E9PD14;D6RBD0;H0Y9P0;D6RGK8;D6RHJ5;D6R909	P63244;J3KPE3;H0Y8W2;H0YAF8;D6R9Z1;H0YAM7;D6R9L0;D6RFX4;D6RHH4;D6RAC2;D6REE5;H0Y8R5	-0.0999294	-0.493907	-0.425799	-0.264418	-0.330603	0.102929	0.100826	0.315344	-0.389686	-0.0250416	-0.235504	-0.0744869	-0.0672915	-0.259501	-0.0828296	NaN	NaN	-0.0605873	3.6659e-177	1481600000	911550000	570100000	6	4	4	7	6	6	7	4	7	10	9	10	9	8	10	0	1	2	12	48.6	48.6	35.076	0	0.161381
ACTA1;ACTC1;ACTG2;ACTA2	Actin, alpha skeletal muscle;Actin, alpha cardiac muscle 1;Actin, gamma-enteric smooth muscle;Actin, aortic smooth muscle	P68133;P68032;P63267;P62736;A6NL76;F8WB63;B8ZZJ2;C9JFL5;F6UVQ4;F6QUT6	P68133;P68032;P63267;P62736;A6NL76;F8WB63;B8ZZJ2;C9JFL5;F6UVQ4;F6QUT6	-0.605722	-0.562323	-0.515072	-0.375778	-0.426718	NaN	NaN	-0.371263	-0.724097	-0.262446	-0.223541	-0.382182	-0.283866	-0.267973	-0.259322	-0.502407	NaN	NaN	1.3445e-291	8083200000	4795300000	3287900000	1	1	1	1	1	1	1	1	1	1	1	1	1	1	1	1	1	1	1	31.6	4.2	42.051	0	0.161075
UBE2L3	Ubiquitin-conjugating enzyme E2 L3	P68036;P68036-3;P68036-2;A0A0B4J2G9	P68036;P68036-3;P68036-2;A0A0B4J2G9	0.289016	NaN	NaN	NaN	NaN	NaN	NaN	NaN	NaN	NaN	NaN	0.458638	0.474256	0.787386	0.26627	NaN	NaN	0.12138	3.2919e-16	303290000	197670000	105610000	2	1	1	1	1	1	1	0	1	2	1	4	2	2	3	1	0	2	4	46.1	46.1	17.861	0	NaN
EEF1A1P5;EEF1A1	Putative elongation factor 1-alpha-like 3;Elongation factor 1-alpha 1	Q5VTE0;P68104;P68104-2;A0A087WVQ9;A0A087WV01;Q5JR01;A6PW80	Q5VTE0;P68104;P68104-2;A0A087WVQ9;A0A087WV01	-0.379181	-0.409604	-0.380249	-0.29659	-0.29589	-0.292377	-0.161649	-0.154956	-0.214053	-0.149738	-0.127129	-0.00153422	-0.0966089	-0.112625	-0.175519	-0.155603	0.021585	-0.0608728	0	20597000000	12711000000	7885500000	11	9	12	12	10	13	13	10	13	13	13	14	11	11	11	11	8	8	9	52.8	52.8	50.184	0	0.0843593
TUBA1B	Tubulin alpha-1B chain	P68363;P68363-2;F8VVB9;F8VQQ4;C9JDS9;F8VRZ4;F8VS66;F8VX09;F8VWV9;F8VRK0;F8VXZ7;F8W0F6	P68363;P68363-2	-0.322354	-0.322796	-0.402752	-0.126908	-0.117643	-0.161753	0.112567	0.0559638	-0.219539	-0.0365203	0.0228548	0.000963107	0.36149	0.309057	0.327155	-0.0184227	0.0184692	-0.0307182	0	26960000000	17244000000	9715800000	18	17	16	18	16	17	15	14	14	15	17	16	15	16	16	14	13	13	0	58.5	58.5	50.151	0	0.195888
TUBB4B	Tubulin beta-4B chain	P68371;M0R2D3;M0QY85;M0QZL7;M0R0X0;M0QY37;M0QX14;M0R2T4;A0A075B724	P68371	-0.358335	-0.306088	-0.394203	-0.132594	-0.131984	-0.178494	-0.0853422	-0.0677401	-0.155504	-0.024371	0.0263045	-0.0169423	0.124337	0.126235	0.0829646	-0.138364	-0.213978	-0.0416857	0	16934000000	10745000000	6189100000	18	11	14	16	13	14	14	14	15	19	15	19	19	15	18	13	9	11	1	64.9	64.9	49.83	0	0.22574
CCT2	T-complex protein 1 subunit beta	P78371;P78371-2;F5GWF6;F8VQ14	P78371;P78371-2;F5GWF6;F8VQ14	-0.0305214	-0.225339	0.0305756	-0.63392	NaN	0.340606	-0.428237	NaN	0.0229241	0.0509903	-0.0504405	0.0218646	0.0777808	0.149438	0.044046	NaN	NaN	0.0454294	2.2138e-145	1611200000	1017900000	593390000	5	3	6	3	0	4	2	1	3	11	10	16	14	9	14	0	1	4	20	51.6	51.6	57.488	0	-0.116135
GSTO1	Glutathione S-transferase omega-1	P78417;P78417-3;Q5TA02;P78417-2;Q5TA01	P78417;P78417-3;Q5TA02;P78417-2;Q5TA01	-1.19687	-1.26313	-0.968314	-2.9391	-2.5734	-2.62326	-3.44871	-3.36585	-2.86627	-3.52168	-3.43817	-3.39498	-4.29729	-4.36412	-4.25753	-0.818707	-0.658612	-0.719997	0	162940000000	45341000000	117600000000	23	24	21	21	22	22	22	20	21	21	19	19	16	18	20	23	21	19	24	75.1	75.1	27.566	0	-1.42639
PRKDC	DNA-dependent protein kinase catalytic subunit	P78527;P78527-2;F5GX40;H0YG84	P78527;P78527-2	0.0671926	0.0822706	0.18663	0.0642682	0.158368	0.0723012	0.0599651	-0.0339026	0.0861468	0.148433	0.145708	0.0241119	0.218198	0.176078	0.179955	-0.140743	-0.192626	-0.231761	0	6222600000	4001100000	2221600000	43	34	39	44	21	21	39	18	39	52	38	49	54	53	53	18	10	15	91	23.6	23.6	469.08	0	-0.00996946
FOXK1	Forkhead box protein K1	P85037-2;P85037;E9PM37;E9PPI7;P58012;A0A087WXM0;Q01167-2;Q01167	P85037-2;P85037	NaN	NaN	NaN	NaN	NaN	0.300955	NaN	NaN	NaN	NaN	NaN	0.0607673	0.299608	0.0706645	NaN	NaN	NaN	NaN	9.2119e-13	104380000	65882000	38494000	1	0	1	0	1	2	0	1	0	1	1	2	3	3	1	1	1	0	5	7.5	7.5	59.701	NaN	NaN
SLC25A3	Phosphate carrier protein, mitochondrial	Q00325-2;Q00325;F8VVM2;F8VZL5;F8VWR4;F8VWQ0	Q00325-2;Q00325;F8VVM2	-0.208852	-0.116886	-0.0983839	-0.208535	0.155262	0.0591135	0.0895805	0.179865	-0.016739	0.136272	0.284511	0.028245	0.290137	0.118412	-0.177181	0.219215	NaN	0.0297253	1.3135e-65	487910000	313810000	174110000	4	3	2	2	2	3	2	2	2	2	2	3	3	3	3	2	0	2	4	10.2	10.2	39.958	0	0.176
CDK6	Cyclin-dependent kinase 6	Q00534;F8VXD2;K7ELV5;F8VYH9;P11802-2;F8VZZ0;F8VTV8;F8VWX7;F8VZ51;Q00535-2;H0YAZ9;Q00535;P11802;Q9BVE2;E7EUK8;Q96Q40-2;Q96Q40-4;E5RGN0;Q96Q40-3;A0A087X209;O94921-3;Q96Q40-5;Q96Q40;A0A087WZU2;O94921-2;O94921;F5H6Z0;Q07002;Q07002-2;Q00536;Q00536-3;Q07002-3;Q00537-2;Q00537;Q00536-2;J3QSD7;Q9NYV4-3;Q14004-2;Q9NYV4-2;Q9NYV4;Q14004	Q00534	-0.265732	NaN	NaN	NaN	NaN	NaN	NaN	NaN	NaN	0.422557	0.459498	0.557758	0.800028	0.58365	0.552387	NaN	NaN	NaN	3.4722e-35	349130000	229690000	119430000	2	0	0	0	0	1	1	0	1	3	3	4	4	4	4	1	1	1	4	16	16	36.938	0	NaN
NFKB2	Nuclear factor NF-kappa-B p100 subunit;Nuclear factor NF-kappa-B p52 subunit	Q00653-4;Q00653;A0A087WWG7;Q00653-3;M0R119	Q00653-4;Q00653;A0A087WWG7;Q00653-3	NaN	NaN	NaN	NaN	0.180669	NaN	NaN	NaN	NaN	0.408971	0.161308	0.663492	-0.184704	0.469681	-0.191636	NaN	NaN	NaN	2.2351e-18	160380000	106590000	53784000	0	0	1	1	2	0	0	0	1	4	2	2	2	4	3	0	0	0	6	7.9	7.9	96.677	NaN	NaN
SORD	Sorbitol dehydrogenase	Q00796;H0YLA4;Q00796-2;H0YKB3	Q00796;H0YLA4	1.75406	1.53859	1.46461	1.50017	1.39221	1.30472	1.39444	1.41603	1.08219	0.18405	0.018235	0.282513	-0.223435	-0.24621	-0.224066	0.828256	0.905457	1.0012	1.4064e-95	1446800000	1062900000	383860000	10	8	8	9	9	9	9	3	6	5	3	5	4	4	4	4	5	2	11	37.5	37.5	38.324	0	-0.146374
HNRNPU	Heterogeneous nuclear ribonucleoprotein U	Q00839-2;Q00839	Q00839-2;Q00839	-0.696307	-0.702316	-1.34012	-0.829763	-0.976296	-1.42288	-1.00452	-0.122835	-0.940278	-0.694079	-0.871926	-0.909178	-0.61336	-0.867583	-0.891939	NaN	NaN	NaN	2.6329e-48	765420000	404040000	361390000	3	3	2	2	2	3	3	2	3	7	6	7	4	5	4	1	1	0	8	11	11	88.979	0	-0.27398
FABP5	Fatty acid-binding protein, epidermal	Q01469;I6L8B7;A8MUU1	Q01469;I6L8B7	-0.122371	0.0140964	0.0201666	0.18606	-0.0925407	0.255151	0.130837	0.52857	0.0393473	0.536407	0.59209	0.519436	0.712145	0.685143	0.730745	0.275601	0.343704	0.110384	5.6107e-247	2317400000	1649000000	668330000	6	4	4	5	4	6	5	2	6	7	5	7	7	7	7	5	3	3	7	53.3	53.3	15.164	0	0.171964
CAP1	Adenylyl cyclase-associated protein 1	Q01518;Q01518-2;Q5T0R1;Q5T0R7;Q5T0R6;Q5T0R5;Q5T0R4;Q5T0R3;Q5T0R2;Q5T0R9;Q5T0S3;Q5T0R8;P40123-3;B7Z385;A0A087X0J3;A0A087WZ15;P40123-2;E9PDI2;P40123	Q01518;Q01518-2	-0.670022	NaN	-0.333578	-0.179522	NaN	-0.175542	0.166552	0.0722264	-0.149742	-0.217662	-0.0384371	-0.112215	0.0769725	-0.118137	-0.130752	NaN	NaN	NaN	3.0477e-91	1173800000	723110000	450690000	3	1	2	3	1	3	5	3	4	8	7	9	6	7	8	1	0	1	13	36.4	36.4	51.901	0	0.324268
HMGCS1	Hydroxymethylglutaryl-CoA synthase, cytoplasmic	Q01581;D6RIW1;P54868-3;P54868-2;P54868	Q01581	-0.825175	-0.677104	-0.511919	-0.472982	-0.489744	-0.723869	-0.495198	-0.611431	-0.531841	0.249628	0.345749	0.313477	-0.238176	-0.131597	-0.32408	0.352655	0.226158	0.368989	0	21614000000	13602000000	8012100000	21	17	16	19	17	18	18	14	18	21	17	20	22	18	20	18	16	22	26	65	65	57.293	0	0.18736
SLC7A5	Large neutral amino acids transporter small subunit 1	Q01650	Q01650	NaN	NaN	NaN	-0.135008	NaN	NaN	NaN	NaN	NaN	0.173067	0.200021	NaN	0.0711094	0.252053	0.364468	NaN	NaN	NaN	5.2872e-34	212800000	133780000	79024000	0	1	0	2	1	0	1	0	1	3	2	2	2	3	2	1	1	0	3	9.5	9.5	55.01	NaN	NaN
FKBP4	Peptidyl-prolyl cis-trans isomerase FKBP4;Peptidyl-prolyl cis-trans isomerase FKBP4, N-terminally processed	Q02790;H0YFG2;F5H1U3	Q02790;H0YFG2	NaN	NaN	NaN	NaN	NaN	NaN	NaN	0.468731	NaN	-0.115227	-0.125953	0.0152231	-0.215106	NaN	-0.19543	NaN	NaN	NaN	1.7464e-40	239320000	141880000	97436000	0	1	1	1	1	1	1	2	1	3	2	2	2	1	3	0	0	0	4	13.1	13.1	51.804	NaN	NaN
RPL6	60S ribosomal protein L6	Q02878;F8VZ45;U3KQR5;F8VR69;F8VZA3;F8VWR1;F8VU16	Q02878	-0.516664	-0.592532	-0.523959	-0.27508	-0.346329	-0.566321	-0.239816	-0.318191	-0.372221	-0.311879	-0.249755	-0.149122	-0.365324	-0.392902	-0.417727	-0.0129548	0.00490785	0.121853	0	32045000000	18649000000	13397000000	19	17	19	19	19	19	18	17	19	16	16	17	16	17	16	12	12	12	20	49.3	49.3	32.728	0	0.17763
GLO1	Lactoylglutathione lyase	Q04760-2;Q04760	Q04760-2;Q04760	NaN	NaN	NaN	NaN	NaN	NaN	NaN	NaN	NaN	-0.129366	NaN	0.0659055	-0.314972	-0.123627	0.0460655	NaN	NaN	NaN	5.0462e-30	224520000	139200000	85318000	1	1	1	1	0	1	0	0	1	2	1	5	2	5	2	0	1	0	7	44.4	44.4	19.043	NaN	NaN
SRSF11	Serine/arginine-rich splicing factor 11	Q5T760;Q05519-2;Q05519;B4DWT1;Q5T757	Q5T760;Q05519-2;Q05519	-2.07634	NaN	NaN	-2.31443	NaN	-2.48613	-2.19421	NaN	-2.27033	-0.884629	NaN	-1.4292	-1.1167	-1.389	NaN	-0.81539	NaN	-0.856805	1.0007e-21	537610000	236050000	301570000	2	1	1	2	1	2	2	1	2	3	1	2	2	2	1	2	0	1	3	13.4	13.4	42.316	0	-0.32394
EEF1A2	Elongation factor 1-alpha 2	Q05639	Q05639	NaN	NaN	NaN	NaN	NaN	NaN	NaN	NaN	NaN	0.175092	NaN	0.57285	NaN	NaN	0.0357249	NaN	NaN	NaN	2.3083e-293	122720000	77688000	45036000	0	0	0	0	0	1	0	0	0	2	0	2	1	0	2	0	0	0	3	34.8	12.7	50.47	NaN	NaN
PPAT	Amidophosphoribosyltransferase	Q06203;D6RE15;D6RCC8	Q06203	0.680669	0.994808	0.901931	0.747812	NaN	0.59737	0.537552	NaN	0.278698	0.423404	0.620188	0.451398	0.547137	0.291258	0.162945	NaN	NaN	NaN	8.2434e-43	364240000	248350000	115890000	6	3	2	3	1	2	2	0	3	5	3	4	4	6	5	0	1	0	7	16.1	16.1	57.398	0	-0.22934
GFPT1	Glutamine--fructose-6-phosphate aminotransferase [isomerizing] 1	Q06210-2;Q06210;E5RJP4	Q06210-2;Q06210	0.0902175	-0.0122278	0.0934809	-0.129918	-0.119142	-0.103509	-0.171657	-0.0906578	0.00783733	0.289782	0.35703	0.289842	0.294322	0.233737	0.292823	-0.123906	0.0470458	0.0993491	1.2807e-295	3700000000	2345800000	1354200000	15	10	14	14	11	12	13	10	12	20	16	25	19	16	21	15	10	7	24	53.7	53.7	76.758	0	-0.209359
PSME1	Proteasome activator complex subunit 1	Q06323;Q06323-3;Q06323-2;H0YKK6;H0YLU2	Q06323;Q06323-3;Q06323-2;H0YKK6;H0YLU2	NaN	0.167409	NaN	NaN	NaN	NaN	0.358853	NaN	NaN	0.335894	NaN	-0.0925839	0.274724	0.509261	0.390966	NaN	NaN	NaN	1.6119e-15	162940000	105760000	57179000	0	2	1	1	0	1	2	1	0	2	1	3	3	2	2	0	1	0	4	16.1	16.1	28.723	0	NaN
PRDX1	Peroxiredoxin-1	Q06830;A0A0A0MSI0;A0A0A0MRQ5	Q06830;A0A0A0MSI0	1.8918	1.91008	1.74898	2.04557	2.26322	2.1244	2.03959	2.04275	2.08993	0.768496	0.714547	0.738736	1.8355	1.98888	1.96615	0.261348	0.18566	0.143574	1.3674e-243	17245000000	14398000000	2847600000	11	12	9	10	11	10	11	6	10	11	10	11	11	10	11	8	5	7	11	69.8	69.8	22.11	0	0.232603
CKAP4	Cytoskeleton-associated protein 4	Q07065	Q07065	0.0894074	-0.0629568	-0.0567731	-0.0688987	-0.0300894	-0.0228589	-0.0346717	-0.024491	-0.0115307	-0.351637	-0.190806	-0.313599	-0.601795	-0.609337	-0.662655	0.0188358	-0.0163672	-0.0624311	0	6790700000	4009800000	2780900000	21	20	16	19	19	18	19	16	18	17	18	19	17	16	18	16	12	13	23	47.7	47.7	66.022	0	0.0266837
KHDRBS1	KH domain-containing, RNA-binding, signal transduction-associated protein 1	Q07666-2;Q07666;Q07666-3;O75525-2;O75525;Q5VWX1	Q07666-2;Q07666;Q07666-3	-0.225903	-0.569698	-0.687735	-0.190378	-0.190793	-0.338984	-0.510787	0.00645539	-0.490171	-0.14046	-0.0939888	-0.22341	-0.149774	-0.104164	-0.214135	-0.101969	-0.280435	-0.118215	9.6985e-74	672440000	402270000	270160000	4	2	2	3	2	2	4	2	2	4	3	4	4	3	4	3	2	2	5	16	16	45.86	0	0.378906
DHX9	ATP-dependent RNA helicase A	Q08211	Q08211	0.375136	NaN	NaN	NaN	NaN	NaN	NaN	NaN	-0.148178	-0.25113	-0.556172	-0.297726	-0.298077	-0.188732	-0.242271	NaN	NaN	NaN	6.7058e-25	221760000	125930000	95825000	2	0	0	1	0	0	1	0	2	5	5	4	4	4	3	1	0	1	8	6.9	6.9	140.96	0	NaN
RBBP4;RBBP7	Histone-binding protein RBBP4	Q09028-4;Q09028-3;Q09028-2;Q09028;H0YEU5;Q5JP02;H0YCT5;H0YF10;H0YDK2;C9JPP3	Q09028-4;Q09028-3;Q09028-2;Q09028;H0YEU5;Q5JP02;H0YCT5;H0YF10;H0YDK2	NaN	NaN	NaN	NaN	NaN	NaN	NaN	NaN	NaN	0.213695	0.343196	0.310409	0.062067	0.464904	0.262172	NaN	NaN	NaN	1.3186e-16	180780000	119040000	61741000	0	0	0	0	0	1	0	0	0	2	2	4	3	3	3	0	0	0	2	11.5	11.5	43.481	NaN	NaN
AHNAK	Neuroblast differentiation-associated protein AHNAK	Q09666	Q09666	0.335136	0.142521	-0.166239	0.0331566	-0.239494	-0.00837195	-0.00540724	0.144283	-0.110598	0.698951	0.662468	0.750113	0.629493	0.640554	0.904538	0.345797	0.440117	0.446432	9.3738e-137	2957000000	2061900000	895150000	7	5	3	10	4	7	9	8	11	19	17	23	18	19	22	4	4	3	40	20.7	20.7	629.09	0	-0.150893
SREBF2	Sterol regulatory element-binding protein 2;Processed sterol regulatory element-binding protein 2	Q12772;H0Y7E5;A0A087X1T2;Q12772-2;G3V0I8;K7EMT8;K7EIW8;B5MD58;P36956;P36956-4	Q12772	-0.278466	-0.226956	-0.0130772	-1.95888	-1.97973	-1.81888	-3.52631	-3.14327	-3.02157	-2.99956	-3.37155	-2.3859	-3.38443	-3.57527	-1.69106	-0.255187	-0.049448	-0.12854	3.2869e-144	1970900000	832400000	1138500000	20	17	17	14	11	13	8	7	5	10	6	6	9	9	7	10	8	10	23	24.6	24.6	123.69	0	-1.73192
ILF3	Interleukin enhancer-binding factor 3	Q12906-5;Q12906-4;Q12906-2;Q12906-6;Q12906-3;Q12906;Q12906-7;K7EQR9;K7EKJ9;K7ERM6;K7ENK6;K7EM82;K7EJ09;K7ER69	Q12906-5;Q12906-4;Q12906-2;Q12906-6;Q12906-3;Q12906;Q12906-7	-0.233227	-0.210902	-0.409315	-0.251993	-0.155325	-0.434358	-0.556085	-0.412635	-0.415537	-0.212655	-0.347543	-0.507133	-0.401716	-0.442843	-0.348717	-0.00362299	-0.364157	-0.701805	1.712e-54	1353200000	744770000	608440000	4	3	7	5	6	5	6	6	7	10	9	11	9	10	9	3	4	3	12	22.6	22.6	74.606	0	-0.0187665
CDC16	Cell division cycle protein 16 homolog	Q5T8C6;Q13042-4;Q13042-3;Q13042-2;Q13042	Q5T8C6;Q13042-4;Q13042-3;Q13042-2;Q13042	NaN	NaN	NaN	NaN	NaN	0.48762	-0.116568	NaN	-0.139188	-0.401085	-0.597473	-0.846241	-1.70474	-0.950772	-0.357662	NaN	NaN	NaN	4.4181e-17	160900000	82860000	78041000	0	0	0	1	1	3	4	1	3	4	4	3	2	2	3	0	1	0	5	9.3	9.3	54.704	NaN	NaN
FLII	Protein flightless-1 homolog	Q13045-2;Q13045-3;Q13045;J3KS54;K7EQZ7;J3QQQ2	Q13045-2;Q13045-3;Q13045;J3KS54	NaN	NaN	NaN	NaN	NaN	NaN	NaN	NaN	NaN	-0.642834	NaN	-2.18616	-1.2331	NaN	NaN	NaN	NaN	NaN	2.1484e-09	2573100000	381200000	2191900000	0	0	0	0	0	0	0	0	1	3	0	2	2	1	0	0	0	1	4	4.9	4.9	138.49	NaN	NaN
ACACA	Acetyl-CoA carboxylase 1;Biotin carboxylase	Q13085;Q13085-4;Q13085-2;Q59FY4;O00763-3;O00763-2;O00763;A0A0C4DGT1;A0A087WWN5;A0A087X2F8;A0A087X126;A0A087WYK6;S4R3S7;F8W8T8;H0YGH5;A0A087WYS8	Q13085;Q13085-4;Q13085-2	-0.561921	-0.575037	-0.507854	-0.39215	-0.438915	-0.503245	-0.298193	-0.367234	-0.435403	-0.109429	0.000411898	-0.020769	-0.100105	-0.127731	-0.102057	-0.3916	-0.359877	-0.313214	0	71722000000	43784000000	27937000000	106	84	88	104	84	93	100	81	103	89	77	82	86	76	81	84	68	82	5	61	61	265.55	0	0.123006
USP4	Ubiquitin carboxyl-terminal hydrolase 4;Ubiquitin carboxyl-terminal hydrolase	Q13107-2;Q13107;H7C189;Q13107-3;C9JNU9	Q13107-2;Q13107;H7C189	0.37557	0.339262	0.385157	0.398025	0.492939	0.668584	-0.918666	-1.11868	-0.650869	-2.83173	-2.4163	NaN	NaN	NaN	NaN	0.0154563	-0.0773746	-0.145971	8.2985e-97	1068100000	627060000	441020000	13	11	8	14	8	13	8	2	6	4	4	0	3	2	2	7	4	6	19	32.6	29	103.96	0	0.117369
AIMP2	Aminoacyl tRNA synthase complex-interacting multifunctional protein 2	Q13155;F8W950;A8MU58;F8WCL2	Q13155;F8W950;A8MU58	-0.0516525	NaN	NaN	-0.14952	-0.00480448	0.0734987	NaN	NaN	NaN	-0.19995	0.135906	NaN	-0.311865	-0.432292	0.0545564	NaN	NaN	NaN	1.5727e-65	575390000	334230000	241160000	2	1	1	2	2	2	1	1	1	4	3	2	5	2	4	1	1	1	8	42.8	42.8	35.348	0	0.046848
PSMD2	26S proteasome non-ATPase regulatory subunit 2	Q13200;Q13200-3;Q13200-2;H7C1H2;C9JPC0;H7C2Q3;F8WBS8	Q13200;Q13200-3;Q13200-2	0.0349512	0.430707	0.222729	0.111314	0.0792316	0.133142	-0.130383	0.213778	0.166543	0.1131	0.229001	0.159545	0.347961	0.385311	0.274981	0.619326	0.490943	0.420265	8.7794e-125	1489300000	989720000	499600000	3	7	5	5	5	6	5	6	6	9	8	12	13	14	11	4	4	4	19	26.4	26.4	100.2	0	-0.111415
DHRS2	Dehydrogenase/reductase SDR family member 2, mitochondrial	Q13268;C9JZP6;Q13268-2;H0YJG9;H0YJP4	Q13268;C9JZP6;Q13268-2;H0YJG9;H0YJP4	-0.50806	-0.636627	-0.877728	-0.448568	-0.287215	-0.571676	-0.312809	-0.394286	-0.607055	-0.421852	-0.63074	-0.32326	-0.486423	-0.479325	-0.511632	-0.251733	-0.021182	-0.204072	3.6729e-49	1181500000	666400000	515060000	3	3	3	6	5	3	5	4	5	5	6	8	6	5	7	2	2	3	9	40	40	29.926	0	0.18806
G3BP1	Ras GTPase-activating protein-binding protein 1	Q13283;E5RH00;E5RI46;E5RIF8;E5RH42;Q13283-2;E5RIZ6;E5RJU8;D6R9X5;D6R9A4;D6RBM9;D6REX8;D6RBR0;D6RE13;D6RBW8;D6RGJ4;D6RAC7;D6RB17;Q9UN86-2;Q9UN86	Q13283;E5RH00;E5RI46;E5RIF8;E5RH42;Q13283-2;E5RIZ6;E5RJU8	NaN	NaN	NaN	NaN	NaN	NaN	NaN	NaN	NaN	-0.18924	-0.339696	-0.436966	-0.290146	-0.676817	NaN	NaN	NaN	NaN	2.7978e-16	114840000	62381000	52461000	0	0	0	0	0	0	0	0	0	2	2	3	2	2	1	0	0	0	3	7.7	7.7	52.164	NaN	NaN
HDAC1;HDAC2	Histone deacetylase 1;Histone deacetylase 2	Q5TEE2;Q13547;Q92769-3;Q92769;E5RFI6;E5RJ04;E5RGV4;E5RHE7;E5RH52;E5RG37;E5RFP9;H3BM24	Q5TEE2;Q13547;Q92769-3;Q92769	NaN	NaN	NaN	NaN	NaN	NaN	NaN	NaN	NaN	0.26476	NaN	NaN	-0.138279	0.076336	0.309936	NaN	NaN	NaN	2.506e-12	189250000	128270000	60984000	0	1	1	1	1	1	0	1	0	2	1	1	2	2	2	0	0	1	3	15.6	15.6	24.544	NaN	NaN
DCTN2	Dynactin subunit 2	Q13561;Q13561-3;Q13561-2;F8W1I6;F8VRV7;H0YI98;F8VW18;F8W0U6;H0YHL1	Q13561;Q13561-3;Q13561-2;F8W1I6;F8VRV7;H0YI98;F8VW18	NaN	NaN	NaN	NaN	NaN	NaN	NaN	NaN	NaN	NaN	NaN	NaN	0.219193	NaN	-0.205558	NaN	NaN	NaN	3.1554e-30	41452000	23077000	18375000	0	0	0	0	1	0	0	0	0	0	1	1	3	0	2	0	0	0	4	10.7	10.7	44.23	NaN	NaN
TUBA3C;TUBA3E	Tubulin alpha-3C/D chain;Tubulin alpha-3E chain	Q13748;Q13748-2;Q6PEY2	Q13748;Q13748-2;Q6PEY2	NaN	NaN	NaN	0.1638	NaN	NaN	NaN	NaN	NaN	-0.142613	-0.116576	-0.0622783	0.685312	0.630292	0.564972	NaN	NaN	NaN	0	415490000	262420000	153070000	1	1	1	2	1	1	1	0	1	2	2	2	2	2	2	0	0	0	2	51.8	5.3	49.959	NaN	NaN
LAMB3	Laminin subunit beta-3	Q13751;X1WI29;Q5THA1	Q13751	NaN	NaN	NaN	NaN	NaN	NaN	NaN	NaN	NaN	0.139915	NaN	-0.0604331	0.534703	NaN	NaN	NaN	NaN	NaN	1.9398e-06	24553000	18496000	6056500	0	0	0	0	0	0	0	0	0	2	0	2	1	1	1	0	0	0	3	3.4	3.4	129.57	NaN	NaN
DDX39B;DDX39A	Spliceosome RNA helicase DDX39B;ATP-dependent RNA helicase DDX39A	Q5STU3;Q13838;Q13838-2;A0A0G2JJZ9;F6WLT2;O00148;F6S4E6;A0A0A0MT12;F6TRA5;O00148-2;F6UJC5;K7EQN7;O00148-3;H0Y400;K7EPJ3;K7EN69;F6QYI9;A0A0G2JJL7;F6R6M7;K7ENP6;A0A0G2JHN7;A0A0D9SEM9;K7EL56;K7EIL8;F6U6E2;F6S2B7;F6SXL5;H0YCC6	Q5STU3;Q13838;Q13838-2;A0A0G2JJZ9;F6WLT2;O00148;F6S4E6;A0A0A0MT12;F6TRA5;O00148-2;F6UJC5;K7EQN7;O00148-3	-0.205951	NaN	-0.719213	-0.321285	NaN	NaN	NaN	NaN	NaN	-0.988648	-0.850186	-0.807726	-0.675532	-0.45914	NaN	NaN	NaN	NaN	5.9022e-25	281480000	142690000	138790000	3	1	3	3	0	0	1	0	1	4	3	8	4	3	2	1	0	0	8	20.2	20.2	48.825	0	0.141297
CKAP5	Cytoskeleton-associated protein 5	Q14008-2;Q14008;Q14008-3;H0YCF6;H0YEK7	Q14008-2;Q14008;Q14008-3	NaN	-0.608164	NaN	NaN	NaN	NaN	NaN	NaN	NaN	0.585429	NaN	0.34833	0.425789	0.459573	0.186502	NaN	NaN	NaN	9.2745e-29	189810000	131990000	57823000	0	2	0	1	0	0	0	0	0	2	1	3	5	7	6	0	0	0	9	6.8	6.8	218.52	0	NaN
BOP1	Ribosome biogenesis protein BOP1	Q14137-2;Q14137;A0A075B729	Q14137-2;Q14137	0.072018	NaN	0.729148	0.286177	0.592262	0.339919	0.330384	0.333273	0.660218	NaN	NaN	NaN	NaN	0.201406	NaN	NaN	NaN	NaN	5.082e-21	144680000	87610000	57072000	2	1	2	4	2	3	2	2	2	0	1	1	1	3	1	0	0	0	7	11.8	11.8	71.929	0	-0.0606642
KEAP1	Kelch-like ECH-associated protein 1	Q14145;K7ESE0;K7EJ49;K7EJD8;K7EPZ3;K7EQX2	Q14145;K7ESE0	0.0865915	NaN	0.054767	NaN	NaN	-0.500066	0.560535	NaN	0.0705423	-0.199224	0.074697	0.180918	0.141593	0.0126592	-0.222321	-0.373536	NaN	NaN	1.2547e-14	220200000	131480000	88723000	2	1	3	1	1	2	2	0	2	3	3	4	2	2	2	2	1	1	5	8.2	8.2	69.666	0	-0.570745
EIF3A	Eukaryotic translation initiation factor 3 subunit A	Q14152-2;Q14152	Q14152-2;Q14152	NaN	NaN	NaN	NaN	NaN	NaN	NaN	NaN	NaN	0.00330049	NaN	0.075963	0.447004	NaN	NaN	NaN	NaN	NaN	1.6527e-21	61606000	37836000	23770000	0	0	0	0	0	0	0	0	0	3	0	3	2	0	1	0	0	0	6	5	5	162.63	NaN	NaN
DPYSL3	Dihydropyrimidinase-related protein 3	Q14195-2;Q14195;H0YBT4	Q14195-2;Q14195	NaN	NaN	NaN	NaN	NaN	NaN	NaN	NaN	NaN	0.494433	-0.0326937	0.393209	NaN	0.530063	0.97657	NaN	NaN	NaN	1.9296e-47	163910000	113470000	50440000	0	0	0	0	0	0	0	0	0	2	3	3	1	3	3	0	0	0	3	10.1	6.7	73.91	NaN	NaN
DYNC1H1	Cytoplasmic dynein 1 heavy chain 1	Q14204	Q14204	NaN	NaN	NaN	NaN	NaN	NaN	NaN	NaN	NaN	NaN	0.00128454	-0.231589	-0.166098	-0.19512	NaN	NaN	NaN	NaN	1.0496e-13	60288000	36894000	23394000	0	0	0	0	0	0	0	0	0	0	2	5	2	2	1	0	1	0	6	1.5	1.5	532.4	NaN	NaN
CTTN	Src substrate cortactin	Q14247;Q14247-3;Q14247-2;H0YEV2;H0YCD9	Q14247;Q14247-3;Q14247-2	0.494769	0.486427	0.504582	NaN	0.507842	0.514349	0.732059	0.831216	0.618434	0.326927	0.615727	0.345121	0.373237	0.369727	0.444242	NaN	NaN	NaN	1.9259e-47	541380000	371080000	170300000	4	2	2	1	4	4	3	3	4	8	5	7	7	6	7	1	0	0	12	23.1	23.1	61.585	0	0.0163268
TRIM25	E3 ubiquitin/ISG15 ligase TRIM25	Q14258	Q14258	0.591066	NaN	0.26464	0.384269	0.743715	0.32286	0.224395	NaN	0.6206	0.226588	0.164265	0.314253	-0.15134	0.00116149	-0.144841	NaN	NaN	NaN	2.0816e-68	632730000	411790000	220940000	6	1	3	4	2	4	3	1	2	7	4	5	6	5	7	1	1	0	8	16.7	16.7	70.973	0	-0.0435837
FLNC	Filamin-C	Q14315;Q14315-2	Q14315;Q14315-2	-0.453023	-0.577977	-0.565127	-0.646457	-0.604598	-0.357561	-0.738143	-0.461002	-0.595434	0.224224	0.171913	0.164465	0.262901	0.27977	0.193533	0.313811	0.276675	0.0740529	2.8122e-191	2184200000	1386300000	797860000	10	9	9	11	8	6	6	8	7	20	23	27	21	20	21	6	8	8	35	21.1	18.7	291.02	0	-0.0394706
RBM39	RNA-binding protein 39	Q14498-3;Q14498-2;Q14498;H0Y4X3;G3XAC6;Q5QP23;Q5QP22;F8WF24;F2Z3E6;F2Z2Z5;A0A087X122;F8WF73;A8MYG5	Q14498-3;Q14498-2;Q14498;H0Y4X3;G3XAC6;Q5QP23	-2.85314	-3.22876	-2.79859	NaN	NaN	-2.65884	NaN	NaN	NaN	-0.843111	-0.817294	-1.13127	-1.26545	-1.17482	-0.857871	-1.745	-2.48824	-2.28042	1.7904e-50	568930000	244350000	324570000	4	3	4	1	1	2	1	0	1	5	3	5	3	4	4	2	3	2	8	21.9	21.9	57.089	0	0.194296
PDIA5	Protein disulfide-isomerase A5	Q14554;Q14554-2;H7C4F9;C9JY10	Q14554;Q14554-2	0.621381	0.516898	0.51763	0.236719	0.56806	0.480599	0.387804	NaN	0.122918	0.157706	0.063996	-0.0394214	-0.483917	NaN	-0.684018	0.0308448	0.135086	0.264732	4.1898e-24	407280000	276670000	130610000	7	4	4	4	5	4	2	1	2	2	3	2	2	1	4	3	3	4	9	18.5	18.5	59.594	0	-0.0370309
MCM6	DNA replication licensing factor MCM6	Q14566	Q14566	NaN	NaN	NaN	NaN	NaN	NaN	NaN	NaN	NaN	NaN	NaN	-0.225392	1.18244	NaN	0.430417	NaN	NaN	NaN	8.4899e-16	127580000	83617000	43967000	0	0	0	0	1	0	1	0	0	1	1	3	2	2	3	0	0	0	5	7.2	7.2	92.888	NaN	NaN
TRIP12	E3 ubiquitin-protein ligase TRIP12	Q14669-4;Q14669;Q14669-2;Q14669-3	Q14669-4;Q14669;Q14669-2;Q14669-3	NaN	NaN	NaN	NaN	NaN	NaN	NaN	NaN	NaN	NaN	NaN	NaN	-0.512769	NaN	-0.437628	NaN	NaN	NaN	1.1322e-11	30636000	18015000	12620000	1	0	0	0	0	0	1	1	0	1	1	1	3	1	2	0	0	0	3	2.4	2.4	192.07	NaN	NaN
USP10	Ubiquitin carboxyl-terminal hydrolase 10	Q14694;Q14694-3;Q14694-2;J3KT19;H3BQP1;H3BNA1;H3BVF1;H3BNS8;H3BNL0;Q68D90;H3BQC6	Q14694;Q14694-3;Q14694-2	0.210601	0.0998528	0.192916	0.211346	0.273822	0.143308	-0.183816	-0.287351	-0.21314	-2.33878	-2.24133	-2.26634	-2.49601	-2.96952	-3.41647	0.278357	0.0370897	0.0971669	5.3908e-186	3328100000	1916200000	1411900000	12	14	12	16	14	16	14	10	14	5	3	6	3	6	3	13	8	11	19	35.2	35.2	87.133	0	0.0184294
GANAB	Neutral alpha-glucosidase AB	Q14697;F5H6X6;Q14697-2;E9PKU7;E9PNH1	Q14697;F5H6X6;Q14697-2;E9PKU7	-0.367427	-0.00975364	-0.0780478	0.0519028	NaN	-0.147528	-0.0189984	-0.00834327	-0.0599429	0.116302	NaN	0.165836	-0.0210496	0.0582651	0.0557932	0.15392	NaN	-0.268335	8.7056e-81	545740000	344630000	201110000	5	2	2	3	0	2	4	2	4	4	1	9	8	5	5	3	1	2	11	14	14	106.87	0	0.0302353
LASP1	LIM and SH3 domain protein 1	Q14847;C9J9W2;Q14847-2;Q14847-3	Q14847;C9J9W2;Q14847-2;Q14847-3	-0.689129	-0.528034	NaN	0.115402	-0.375831	-0.402081	NaN	NaN	NaN	0.0463898	0.119443	0.0620432	0.300915	0.0516323	NaN	NaN	NaN	NaN	6.4558e-24	146850000	92810000	54039000	2	2	1	2	2	2	1	0	0	3	2	4	3	2	2	1	0	0	6	24.1	24.1	29.717	0	0.23275
KPNB1	Importin subunit beta-1	Q14974;Q14974-2;J3KTM9;J3QR48;J3QKQ5	Q14974;Q14974-2;J3KTM9	-0.463595	-0.125975	-0.229035	-0.0884471	-0.374917	-0.213213	-0.0313571	0.105962	-0.0561889	-0.103702	-0.0316989	0.0734968	-0.0362745	-0.015724	0.15297	0.0230422	0.0147521	NaN	4.3165e-151	2174300000	1342600000	831690000	5	5	7	8	5	5	8	3	5	12	10	15	11	10	11	4	3	1	17	23.6	23.6	97.169	0	0.0158218
NCAPD2	Condensin complex subunit 1	Q15021;E7EN77;F5H431;F5GZK7;REV__Q02790	Q15021;E7EN77	0.303637	0.228447	0.347812	0.168069	0.292041	0.225596	0.15481	0.282132	0.40774	0.0906177	0.0962881	0.0453003	-0.308347	-0.233829	-0.276545	0.246688	0.156171	0.126796	0	10403000000	6592300000	3811100000	39	28	30	37	27	32	33	19	34	36	28	39	34	28	35	26	14	21	48	46.3	46.3	157.18	0	-0.0780417
KARS	Lysine--tRNA ligase	Q15046;Q15046-2;H3BRC9;H3BVA8	Q15046;Q15046-2	NaN	NaN	NaN	NaN	NaN	NaN	NaN	NaN	NaN	NaN	0.410829	0.0974595	NaN	0.0243338	NaN	NaN	NaN	NaN	1.7955e-18	104450000	65758000	38697000	0	0	0	0	0	1	0	0	1	0	2	3	1	2	2	0	0	0	5	8.9	8.9	68.047	NaN	NaN
PDIA6	Protein disulfide-isomerase A6	Q15084-3;Q15084;Q15084-4;Q15084-5;Q15084-2	Q15084-3;Q15084;Q15084-4;Q15084-5;Q15084-2	0.528456	0.468869	0.389843	0.410921	0.50694	0.511064	0.487826	0.408029	0.458679	0.27347	0.277741	0.210929	-0.095313	-0.189678	-0.257066	0.0622431	0.0853357	0.0831959	0	49403000000	33459000000	15944000000	18	19	17	19	18	16	19	16	16	14	15	15	15	14	14	12	13	13	22	54.9	54.9	47.837	0	0.038071
PPA1	Inorganic pyrophosphatase	Q5SQT6;Q15181	Q5SQT6;Q15181	NaN	NaN	NaN	NaN	NaN	NaN	NaN	NaN	NaN	NaN	NaN	0.446958	0.767056	0.602286	0.49803	NaN	NaN	NaN	2.7367e-25	110980000	80132000	30847000	0	0	0	0	0	0	0	0	0	0	1	3	2	2	2	0	0	0	3	23.6	23.6	19.982	NaN	NaN
PTGES3	Prostaglandin E synthase 3	Q15185-4;Q15185-3;Q15185;A0A087WYT3;B4DDC6	Q15185-4;Q15185-3;Q15185;A0A087WYT3	NaN	NaN	NaN	NaN	NaN	-0.928977	-1.07003	NaN	1.61546	NaN	NaN	NaN	NaN	NaN	NaN	NaN	NaN	NaN	2.08e-06	117790000	80268000	37519000	1	0	1	1	0	2	2	2	2	1	1	0	1	1	0	0	0	0	3	20.9	20.9	16.476	NaN	NaN
NONO	Non-POU domain-containing octamer-binding protein	Q15233-2;Q15233;C9IZL7;H7C367;C9JYS8;C9J4X2	Q15233-2;Q15233;C9IZL7;H7C367;C9JYS8	NaN	NaN	-1.03168	-0.698221	-0.987467	-0.981027	-0.678841	-0.490119	-0.781806	-0.608107	-0.635052	-0.518712	-0.00184125	-0.477798	-0.154403	-0.446822	NaN	-0.614873	3.8642e-26	422070000	223530000	198550000	1	1	2	2	2	3	2	3	3	5	4	4	3	2	4	3	1	2	6	18.6	16.5	43.866	0	0.050653
PCBP1	Poly(rC)-binding protein 1	Q15365;F8VTZ0;H3BSP4;C9K0A2;F8WC71;C9IZV9;C9J7A9;C9JSA6;C9J5V4;C9JTY5;C9JZY3;C9J0A4;P57723-2;F6TJN8;P57723	Q15365	0.171391	0.174604	0.193652	-0.0246739	0.0681737	-0.0291103	-0.0847871	0.00931778	0.183961	0.417756	0.44868	0.215907	0.52653	0.59046	0.642214	0.171711	0.101314	0.176174	0	14836000000	10143000000	4693100000	14	11	10	11	10	11	11	10	9	12	9	10	10	10	11	11	10	13	12	71.9	71.9	37.497	0	-0.199278
PCBP2	Poly(rC)-binding protein 2	Q15366-6;Q15366-3;Q15366;Q15366-2;Q15366-7;Q15366-4;H3BRU6;F8VZX2;Q15366-8;Q15366-5;F8W0G4;F8VXH9;F8W1G6;H3BSS4;P57721-5;E9PFP8;P57721-4;P57721;F8VRH0;J3QT27;P57721-2;P57721-3;H3BND9	Q15366-6;Q15366-3;Q15366;Q15366-2;Q15366-7;Q15366-4;H3BRU6;F8VZX2;Q15366-8;Q15366-5;F8W0G4;F8VXH9	0.199089	0.139267	0.251348	0.0916207	0.162498	0.167107	0.156122	0.235821	0.333626	0.196159	0.216731	0.171305	0.469883	0.444412	0.289392	0.13888	0.169208	0.142209	0	2286900000	1527900000	759050000	5	4	4	5	4	5	5	3	4	7	5	6	6	6	8	5	4	5	10	44	31	38.15	0	-0.0365912
SF3B3	Splicing factor 3B subunit 3	Q15393;Q15393-2;I3L4G7	Q15393;Q15393-2	NaN	NaN	NaN	NaN	NaN	NaN	NaN	NaN	NaN	NaN	0.11918	-0.441074	NaN	0.188308	-1.13377	NaN	NaN	NaN	1.2421e-11	95015000	40111000	54904000	0	0	0	0	0	0	0	0	0	0	2	4	1	2	2	0	0	0	3	3.9	3.9	135.58	NaN	NaN
DLGAP5	Disks large-associated protein 5	Q15398-3;Q15398;Q15398-1;G3V4E5;G3V543	Q15398-3;Q15398;Q15398-1	-0.525724	-0.432612	0.48937	0.38958	NaN	-0.0109935	NaN	NaN	0.94096	0.217627	0.864555	0.214366	0.368702	0.272374	0.234492	0.305781	0.44324	0.69279	4.9617e-27	397560000	254470000	143090000	4	2	2	2	1	2	3	0	2	5	4	4	4	6	6	2	3	2	11	15.8	15.8	94.177	0	0.621905
CNN3	Calponin-3	Q15417-3;Q15417;Q15417-2;E9PDU6	Q15417-3;Q15417;Q15417-2;E9PDU6	-0.0958891	-0.236888	-0.252616	-0.0558002	0.0299696	-0.233206	0.0404329	NaN	-0.103012	-0.284005	-0.268157	-0.143527	-0.194214	0.0290077	-0.130825	-0.0378474	-0.0848907	-0.158688	1.1619e-46	1035500000	638790000	396670000	1	2	1	2	2	4	2	1	2	6	6	8	8	6	8	2	2	2	7	36	36	31.38	0	0.181088
SF1	Splicing factor 1	Q15637-4;Q15637-6;Q15637-3;Q15637-2;Q15637;Q15637-5;Q15637-7;C9J792;F8WEV5;H7C561	Q15637-4;Q15637-6;Q15637-3;Q15637-2;Q15637;Q15637-5;Q15637-7	0.137601	0.0404974	NaN	-0.0842094	-0.0185645	-0.0195189	-0.0695621	-0.101258	0.293207	0.396776	0.281593	0.310893	-3.18889	-3.16616	-3.26773	0.232277	NaN	0.153068	2.7896e-41	1606300000	380550000	1225800000	3	3	1	3	3	3	3	2	3	4	2	4	2	2	2	2	1	2	6	14.1	14.1	59.711	0	-0.108568
TRIP13	Pachytene checkpoint protein 2 homolog	Q15645;H0YAL2	Q15645	NaN	NaN	NaN	NaN	NaN	NaN	NaN	NaN	NaN	NaN	0.583715	0.508142	1.10263	1.16256	NaN	NaN	NaN	NaN	3.1609e-14	95932000	71695000	24238000	0	0	0	0	0	0	0	0	0	2	2	3	2	3	0	0	1	0	4	10.4	10.4	48.55	NaN	NaN
TRIP6	Thyroid receptor-interacting protein 6	Q15654;H7BZE2;A0A0D9SFS2	Q15654;H7BZE2	1.27587	NaN	NaN	NaN	NaN	NaN	NaN	NaN	NaN	0.257975	0.573333	0.0464014	0.275723	0.78001	0.914525	NaN	NaN	NaN	1.3632e-32	224770000	158770000	66003000	2	0	0	0	1	0	0	1	1	2	2	5	3	4	2	0	0	0	6	21.2	21.2	50.287	0	NaN
MAPRE1	Microtubule-associated protein RP/EB family member 1	Q15691	Q15691	NaN	NaN	NaN	NaN	NaN	-0.0847963	NaN	NaN	NaN	0.520188	0.35765	0.196009	0.378246	0.273977	0.028881	NaN	NaN	NaN	4.1112e-23	253730000	162870000	90863000	0	0	0	1	1	2	0	0	0	2	3	5	3	2	3	0	1	0	5	26.5	26.5	29.999	NaN	NaN
SLC1A5	Neutral amino acid transporter B(0)	Q15758;Q15758-3;Q15758-2;M0QXM4	Q15758;Q15758-3;Q15758-2;M0QXM4	NaN	NaN	NaN	NaN	NaN	NaN	NaN	NaN	NaN	NaN	NaN	0.217721	0.273905	NaN	0.0103263	NaN	NaN	NaN	1.0489e-07	106740000	68064000	38674000	0	1	1	1	0	1	0	1	0	1	2	2	2	1	2	1	0	0	2	3.9	3.9	56.598	NaN	NaN
DPYSL2	Dihydropyrimidinase-related protein 2	Q16555-2;Q16555;E5RFU4;E9PD68;Q14194;Q14194-2	Q16555-2;Q16555	-0.60059	-0.110344	-0.359372	-0.377738	-0.313572	-0.240583	-0.211498	NaN	-0.160166	0.324488	0.218365	0.07232	0.152721	0.260472	0.271976	NaN	NaN	NaN	8.3941e-84	866450000	567940000	298510000	3	3	2	2	2	3	3	1	3	5	6	11	6	8	8	1	1	1	10	29.1	29.1	58.162	0	0.0457991
FSCN1	Fascin	Q16658;C9JPH9;C9JFC0;A0A0A0MSB2	Q16658	-0.299773	-0.325863	-1.18715	-0.305229	NaN	NaN	-0.275199	NaN	-0.609272	0.0854065	0.0464525	0.0117826	0.0247138	0.0796327	0.14511	0.168795	NaN	0.200261	2.2496e-90	739650000	461200000	278440000	3	3	2	3	1	2	3	0	3	5	5	6	4	5	6	3	1	2	9	23.9	23.9	54.529	0	0.0206341
PDS5A	Sister chromatid cohesion protein PDS5 homolog A	Q29RF7;H0Y9L6;Q9NTI5-3;Q29RF7-3;Q9NTI5-2;Q9NTI5	Q29RF7	NaN	NaN	NaN	NaN	NaN	NaN	NaN	NaN	NaN	0.167125	NaN	0.0299709	NaN	0.206468	0.705809	NaN	NaN	NaN	1.3814e-12	61994000	39190000	22804000	0	0	0	1	0	0	0	0	0	2	1	3	1	3	2	0	0	0	5	4.9	4.9	150.83	NaN	NaN
ERCC6L	DNA excision repair protein ERCC-6-like	Q2NKX8;B5MDQ0	Q2NKX8;B5MDQ0	NaN	-0.161973	NaN	NaN	NaN	0.0195764	0.039876	NaN	NaN	0.284139	NaN	-0.075154	0.0690058	0.629137	0.205501	NaN	NaN	NaN	4.729e-40	5177800000	259550000	4918200000	1	2	1	1	1	2	4	1	1	7	1	5	6	5	6	0	1	1	11	11.9	11.9	141.1	0	0.181549
HSDL1	Inactive hydroxysteroid dehydrogenase-like protein 1	Q3SXM5-2;Q3SXM5;H3BQI7;H3BT52;H3BNH5	Q3SXM5-2;Q3SXM5;H3BQI7;H3BT52	0.437522	0.415568	NaN	0.878588	0.748109	0.717566	0.782089	0.889683	0.743907	0.145942	0.326392	0.0764567	0.281335	0.264052	0.464429	NaN	NaN	NaN	9.7521e-38	510740000	336790000	173950000	3	3	1	3	4	3	5	3	3	5	3	5	5	3	5	1	1	1	5	20.4	20.4	30.86	0	0.321564
TUBB8	Tubulin beta-8 chain	Q3ZCM7;A0A075B736;Q5SQY0	Q3ZCM7;A0A075B736;Q5SQY0	NaN	NaN	NaN	NaN	NaN	NaN	NaN	NaN	NaN	-0.24041	NaN	-0.0224862	0.151215	NaN	0.20938	NaN	NaN	NaN	1.0428e-211	522250000	328920000	193330000	1	0	0	1	0	1	1	0	1	1	0	1	1	0	1	1	0	1	1	24.1	7.2	49.775	NaN	NaN
GLE1	Nucleoporin GLE1	Q53GS7-2;Q53GS7	Q53GS7-2;Q53GS7	NaN	NaN	NaN	NaN	NaN	NaN	NaN	NaN	NaN	0.249899	-0.207287	NaN	0.262229	-0.002513	0.213882	NaN	NaN	NaN	6.7745e-19	64007000	42542000	21465000	0	0	0	0	0	1	0	0	1	2	1	1	3	3	2	0	0	0	5	12	12	75.406	NaN	NaN
OCIAD2	OCIA domain-containing protein 2	Q56VL3;D6RD77;J3KPI9;Q56VL3-2	Q56VL3	-0.418535	-0.619513	NaN	-0.513148	-0.375236	0.0286006	-0.148917	-0.32321	-0.167013	-0.169692	-0.265318	-0.115413	-0.374309	0.231918	-0.0998868	-0.348678	NaN	NaN	1.1405e-27	633010000	349330000	283680000	2	3	1	2	3	3	3	2	2	3	3	3	2	3	3	2	1	1	4	27.3	27.3	16.953	0	0.143788
HSP90AB2P	Putative heat shock protein HSP 90-beta 2	Q58FF8	Q58FF8	NaN	0.10644	0.310346	NaN	NaN	NaN	NaN	0.0424267	NaN	NaN	0.150513	NaN	NaN	0.705552	NaN	NaN	NaN	NaN	4.3494e-67	582400000	393240000	189160000	1	1	1	1	1	1	1	1	1	1	1	1	1	1	1	1	1	1	1	18.6	3.9	44.348	0	NaN
MAGED2	Melanoma-associated antigen D2	Q9UNF1-2;Q5H909;Q9UNF1;Q5H907;Q12816-5;A0A087X070;G5E9N2;Q12816-2;Q9Y5V3;Q9Y5V3-2;Q12816-3;Q12816-4;Q12816	Q9UNF1-2;Q5H909;Q9UNF1;Q5H907	0.291101	0.122885	0.118461	0.153412	0.156707	-0.0300735	0.0841777	0.326731	0.0669982	0.402643	0.346119	0.371706	0.222971	0.302634	0.336777	-0.12454	-0.0513987	-0.00994086	1.7419e-183	2898200000	1907200000	991020000	12	6	4	10	7	7	10	7	9	12	10	14	13	9	13	7	3	8	16	40.6	40.6	63.167	0	0.0305271
C3orf38	Uncharacterized protein C3orf38	Q5JPI3-2;Q5JPI3;E9PFZ1	Q5JPI3-2;Q5JPI3;E9PFZ1	0.608324	0.987005	0.317731	0.593058	NaN	0.423683	NaN	0.611589	NaN	NaN	NaN	NaN	NaN	NaN	NaN	NaN	NaN	NaN	3.4874e-37	152920000	101510000	51409000	3	2	2	2	1	3	1	2	1	1	0	0	0	0	0	1	1	0	4	18	18	37.28	0	-0.0999533
RRP12	RRP12-like protein	Q5JTH9-2;Q5JTH9-3;Q5JTH9;A0A087X1U8	Q5JTH9-2;Q5JTH9-3;Q5JTH9	NaN	NaN	NaN	NaN	NaN	NaN	NaN	NaN	NaN	NaN	NaN	NaN	-0.671689	0.1633	NaN	NaN	NaN	NaN	3.7499e-13	84171000	48512000	35659000	1	0	0	0	0	0	0	0	0	1	1	1	2	5	1	0	0	0	5	5	5	132.71	NaN	NaN
SMEK2	Serine/threonine-protein phosphatase 4 regulatory subunit 3B	Q5MIZ7-3;Q5MIZ7-2;Q5MIZ7;Q5MIZ7-4;G3V4R3;G3V231;G3V5A2;Q5MIZ7-5;Q6IN85-5;H0YIY8;Q6IN85-4;G3V5Z3;Q6IN85-2;Q6IN85	Q5MIZ7-3;Q5MIZ7-2;Q5MIZ7	NaN	NaN	0.491866	NaN	-0.101668	-0.491386	-0.317636	NaN	-0.0419033	-0.900826	-0.970781	-0.623506	NaN	NaN	-1.77909	-0.30635	-0.130832	NaN	9.8482e-11	203800000	113170000	90629000	1	0	2	1	3	2	2	1	2	2	2	2	0	0	2	2	3	1	4	6.7	6.7	87.376	0	-0.788393
WDR45B	WD repeat domain phosphoinositide-interacting protein 3	Q5MNZ6;I3L4S6;I3L4L8;I3L3A5;I3L1D0	Q5MNZ6;I3L4S6	0.162571	0.0787556	0.195509	-0.248297	-0.152003	-0.0140202	-0.254342	-0.331346	-0.0100725	-0.685918	-0.490219	-0.52415	-1.75179	-1.61741	-1.57556	-0.123456	-0.0507349	0.0952816	9.2847e-57	1915700000	1067100000	848650000	7	6	5	7	7	8	8	5	9	8	5	8	7	4	6	7	4	3	9	25	25	38.121	0	-0.314574
S100A2		Q5RHS7	Q5RHS7	-0.335277	-0.194267	-0.338818	-0.351623	NaN	-0.374644	-0.339131	NaN	NaN	NaN	NaN	NaN	NaN	NaN	NaN	NaN	NaN	NaN	1.1181e-33	272420000	159720000	112700000	2	2	2	2	1	2	2	1	1	0	0	0	0	0	0	1	1	1	1	28.4	28.4	10.97	0	-0.0278569
NOL9	Polynucleotide 5-hydroxyl-kinase NOL9	Q5SY16	Q5SY16	1.05797	1.01488	NaN	NaN	NaN	NaN	NaN	NaN	0.167962	NaN	NaN	NaN	0.489194	NaN	NaN	NaN	NaN	NaN	4.0531e-09	70093000	52553000	17540000	2	2	1	0	1	0	1	1	2	0	0	0	2	0	0	0	0	0	4	6.3	6.3	79.322	0	NaN
ATAD3B;ATAD3C;ATAD3A	ATPase family AAA domain-containing protein 3B;ATPase family AAA domain-containing protein 3C;ATPase family AAA domain-containing protein 3A	Q5T9A4;Q5T9A4-3;Q5T2N8;Q9NVI7-3;H0Y2W2;Q9NVI7-2;Q9NVI7;Q5SV16;J3QSF3;Q5T9A4-2	Q5T9A4;Q5T9A4-3;Q5T2N8;Q9NVI7-3;H0Y2W2;Q9NVI7-2;Q9NVI7	0.688352	0.740528	NaN	0.600016	0.576795	0.677329	0.699645	NaN	0.575459	NaN	NaN	-0.168282	-0.287227	0.0249244	-0.00338198	NaN	NaN	NaN	1.115e-49	326050000	211800000	114240000	4	2	1	2	2	2	3	1	2	2	2	3	3	2	3	0	1	0	6	11.1	11.1	72.572	0	-0.114424
NT5DC1	5-nucleotidase domain-containing protein 1	Q5TFE4;Q5TFE4-2;Q5QPD0;H0YDA5	Q5TFE4;Q5TFE4-2;Q5QPD0	0.255369	0.29134	0.303263	0.0184998	0.289646	0.153834	0.161696	0.331246	0.120904	-0.363392	NaN	0.089077	-0.992836	NaN	-0.836195	NaN	-0.180997	NaN	5.1754e-65	815830000	506890000	308940000	6	5	3	4	4	5	7	3	5	3	1	4	2	0	2	1	2	1	8	25.1	25.1	51.844	0	-0.137506
FAM160B1	Protein FAM160B1	Q5W0V3-2;Q5W0V3;Q5W0V1;Q5W0V4	Q5W0V3-2;Q5W0V3	0.12032	-0.170248	-0.10782	-0.882842	-0.81487	-0.914224	NaN	NaN	-0.582109	0.0256359	0.0787847	-0.294102	-0.593342	-0.389888	-0.436788	-0.0810556	-0.36929	-0.381777	8.0451e-34	658450000	392720000	265730000	3	4	2	3	2	2	1	1	2	6	4	4	6	4	6	3	3	4	8	12.3	12.3	83.734	0	-0.775022
AMMECR1L	AMMECR1-like protein	Q6DCA0;Q9Y4X0-4;Q9Y4X0;Q9Y4X0-3	Q6DCA0	0.166701	-0.141725	0.0924686	-0.526364	-0.33924	-0.58255	-1.53737	-1.4862	NaN	NaN	NaN	NaN	NaN	-3.90355	NaN	NaN	NaN	NaN	6.5204e-13	116080000	51611000	64469000	2	3	2	3	3	4	2	3	1	2	0	1	0	3	0	0	1	0	5	23.2	23.2	34.499	0	-0.618832
NXN	Nucleoredoxin	Q6DKJ4;Q6DKJ4-3;I3L4V6;Q6DKJ4-2;A0A0G2JQK5;A0A0C4DGI2	Q6DKJ4;Q6DKJ4-3;I3L4V6	-0.630953	-0.75426	-0.538515	-2.41879	-2.25733	-2.23796	-3.59744	-3.60335	-3.87527	-5.45555	-5.5611	-5.66826	-5.56396	-5.42322	-5.60392	-0.405252	-0.325392	-0.392635	0	25466000000	7739400000	17727000000	19	17	16	20	16	17	16	13	15	18	16	15	19	15	21	20	19	18	25	64.6	64.6	48.392	0	-1.62638
ELP2	Elongator complex protein 2	Q6IA86-2;Q6IA86-3;Q6IA86-5;Q6IA86;Q6IA86-6;Q6IA86-7;Q6IA86-4;K7ER35;F5GYE9;F5GWY6	Q6IA86-2;Q6IA86-3;Q6IA86-5;Q6IA86;Q6IA86-6;Q6IA86-7;Q6IA86-4	NaN	NaN	NaN	0.499299	NaN	NaN	NaN	NaN	0.950298	0.514473	0.62179	0.273962	0.190224	0.536504	0.14587	NaN	NaN	NaN	3.8792e-39	272330000	186180000	86151000	1	1	1	2	0	1	1	1	2	5	4	4	4	6	7	0	0	1	10	13	13	84.887	NaN	NaN
DESI1	Desumoylating isopeptidase 1	Q6ICB0	Q6ICB0	0.689187	0.666202	0.552415	0.844766	0.65172	0.658461	0.599935	0.493738	0.58002	-0.984055	-0.834649	-0.832558	-2.34115	-2.29717	-2.3116	0.110039	NaN	NaN	9.5706e-14	1825600000	1051200000	774370000	3	4	3	4	3	4	3	3	3	3	3	3	2	2	3	3	1	0	4	16.1	16.1	18.262	0	-0.00774085
RETSAT	All-trans-retinol 13,14-reductase	Q6NUM9;Q6NUM9-2;H7BZ81;H7C3J0;H7BZ16;H0YGU3	Q6NUM9;Q6NUM9-2;H7BZ81;H7C3J0	0.0987682	-0.00393527	-0.231384	-0.0747203	-0.0375516	-0.184016	-0.543294	-0.274809	-0.15914	-0.628079	NaN	NaN	-0.918669	NaN	-0.938918	NaN	NaN	-0.496654	2.3841e-17	192070000	104250000	87821000	3	2	2	3	3	4	5	3	5	2	1	1	2	0	2	1	1	3	7	14.3	14.3	66.819	0	-0.0707851
EDC4	Enhancer of mRNA-decapping protein 4	Q6P2E9;Q6P2E9-2;I3L2F4	Q6P2E9;Q6P2E9-2	NaN	NaN	NaN	NaN	NaN	NaN	NaN	NaN	NaN	NaN	0.273108	NaN	0.404998	-0.134092	0.574118	NaN	NaN	NaN	1.1242e-10	90195000	62897000	27299000	0	0	0	1	0	0	1	0	1	1	3	1	2	3	2	0	0	0	4	3.9	3.9	151.66	NaN	NaN
BRAT1	BRCA1-associated ATM activator 1	Q6PJG6;Q6PJG6-2;Q6PJG6-3;F8WDN5	Q6PJG6	0.31913	0.35219	0.546633	0.365798	0.41461	0.357414	0.179723	0.315809	0.489989	-0.389942	-0.283464	-0.373973	-0.535353	-0.641674	-0.655922	0.176714	0.0359437	0.0540117	0	5680600000	3602100000	2078400000	28	20	22	29	21	22	22	17	24	19	18	18	19	16	18	15	12	14	34	59.8	59.8	88.118	0	0.0136079
LARP4	La-related protein 4	Q96J85;Q71RC2-7;X6RLN4;Q71RC2-2;Q71RC2-5;Q71RC2-3;Q71RC2;Q71RC2-4	Q96J85;Q71RC2-7;X6RLN4;Q71RC2-2;Q71RC2-5;Q71RC2-3;Q71RC2;Q71RC2-4	NaN	NaN	NaN	NaN	NaN	NaN	NaN	NaN	NaN	NaN	0.265197	0.594844	NaN	0.684032	NaN	NaN	NaN	NaN	1.6848e-11	51310000	35263000	16047000	0	0	0	0	0	0	0	0	0	1	2	1	1	2	1	0	0	0	2	10.1	10.1	42.504	NaN	NaN
SND1	Staphylococcal nuclease domain-containing protein 1	Q7KZF4;H7C597	Q7KZF4	NaN	NaN	NaN	-0.500647	NaN	NaN	NaN	NaN	NaN	-0.0510094	0.00585008	0.00550051	-0.298341	0.0697939	0.0251349	NaN	NaN	NaN	3.4512e-23	302330000	180540000	121790000	1	0	0	2	1	0	0	0	0	5	4	5	3	6	4	0	0	0	8	9.5	9.5	102	NaN	NaN
CYFIP1	Cytoplasmic FMR1-interacting protein 1	Q7L576;A0A0G2JR96;A0A0G2JQT1;Q7L576-2;A0A0G2JQH3;A0A087WVZ5	Q7L576;A0A0G2JR96;A0A0G2JQT1;Q7L576-2	NaN	-0.360405	NaN	NaN	NaN	-0.57265	NaN	NaN	NaN	0.0556582	0.516956	0.0528105	0.575314	0.224246	0.104104	NaN	NaN	NaN	1.4698e-37	251300000	157870000	93433000	1	3	1	1	1	2	1	1	1	3	2	5	6	3	4	1	1	0	4	7	7	145.18	0	-0.212246
ATG9A	Autophagy-related protein 9A	Q7Z3C6;Q7Z3C6-2;Q7Z3C6-3;H7C152;H7C1G6;C9JD65;C9JXG2;C9JX27;C9IYZ9;C9JKV7;C9JDK4;C9JS65;C9JFV2;F2Z3I6	Q7Z3C6;Q7Z3C6-2	0.195388	0.408742	0.687719	0.583549	0.207358	0.0933188	-0.373532	-0.541459	-0.283873	-2.49711	-1.84426	-2.07019	-2.42804	-2.15906	-2.60373	-0.137658	0.1782	0.236933	5.0223e-86	1097200000	624210000	473000000	13	5	6	13	8	11	9	3	9	3	6	4	3	4	5	5	5	4	18	25.5	25.5	94.446	0	-0.201384
MAVS	Mitochondrial antiviral-signaling protein	Q7Z434-4;Q7Z434	Q7Z434-4;Q7Z434	NaN	1.10737	NaN	NaN	NaN	0.977625	0.930124	1.0359	0.948312	0.120994	0.222429	0.32523	NaN	0.189947	0.217415	NaN	0.492756	NaN	8.688e-19	224570000	150190000	74377000	1	2	1	1	1	2	2	2	2	2	3	2	1	3	3	1	2	1	4	12.5	12.5	40.467	0	-0.129741
WAPAL	Wings apart-like protein homolog	Q7Z5K2;Q7Z5K2-2;Q7Z5K2-3;Q8WVX6	Q7Z5K2;Q7Z5K2-2;Q7Z5K2-3;Q8WVX6	NaN	NaN	NaN	NaN	NaN	NaN	NaN	NaN	NaN	-0.94652	NaN	-0.683674	NaN	0.126416	0.455806	NaN	NaN	NaN	1.4254e-17	130170000	77807000	52362000	0	0	0	1	0	0	0	0	1	3	0	2	1	3	4	0	0	0	7	8.1	8.1	132.94	NaN	NaN
HUWE1	E3 ubiquitin-protein ligase HUWE1	Q7Z6Z7-2;Q7Z6Z7-3;Q7Z6Z7;H0Y659;A0A087X1S3	Q7Z6Z7-2;Q7Z6Z7-3;Q7Z6Z7	NaN	0.496661	NaN	0.17377	NaN	-0.638653	NaN	NaN	-0.286621	-0.105441	0.17941	0.141495	0.0424498	0.341785	0.305908	NaN	-0.0288695	NaN	2.3591e-116	275720000	174310000	101410000	2	2	1	4	0	2	1	1	2	5	4	7	7	9	5	1	2	0	14	4.2	4.2	480.19	0	-0.729103
KTN1	Kinectin	Q86UP2-2;Q86UP2-3;Q86UP2-4;Q86UP2;G3V4Y7;H0YJP2;H0YJZ8;G3V5G2;B7Z6P3	Q86UP2-2;Q86UP2-3;Q86UP2-4;Q86UP2	-0.392303	-0.381391	-0.659263	-0.0930821	-0.573634	-0.10228	-1.35356	NaN	-1.29622	-0.199576	-0.191549	-0.0263492	0.140781	0.0630792	-0.141871	NaN	NaN	NaN	2.6425e-43	313630000	179660000	133970000	4	4	2	4	2	2	2	1	2	2	2	6	5	4	4	0	0	0	10	8.7	8.7	149.61	0	0.290023
TXNDC5	Thioredoxin domain-containing protein 5	Q86UY0;Q8NBS9;Q8NBS9-2	Q86UY0;Q8NBS9;Q8NBS9-2	0.484976	0.410493	0.384277	0.283702	0.3723	0.391186	0.404228	0.2976	0.42129	0.317102	0.340433	0.270004	0.103038	-0.0675488	-0.0732321	0.155972	0.0751127	-0.000561208	0	7100800000	4767800000	2333000000	15	11	11	12	12	13	16	13	13	12	9	12	9	9	11	11	12	10	18	56.9	56.9	40.369	0	-0.0381922
CAND1	Cullin-associated NEDD8-dissociated protein 1	Q86VP6;Q86VP6-2;A0A0C4DGH5;Q86VP6-3;H0YH27	Q86VP6;Q86VP6-2;A0A0C4DGH5	-0.123377	NaN	NaN	NaN	NaN	NaN	NaN	NaN	NaN	-0.0818286	NaN	-0.0390415	-0.132861	-0.11283	0.269838	NaN	NaN	NaN	2.1525e-33	154370000	93972000	60393000	2	0	0	1	0	0	0	0	0	5	0	6	4	3	4	0	0	0	11	10.6	10.6	136.37	0	NaN
CXorf67	Uncharacterized protein CXorf67	Q86X51	Q86X51	0.460677	0.589383	0.544845	0.445653	0.373622	0.450163	0.184666	0.488726	0.593923	0.428429	0.288944	0.100609	0.612587	0.647984	0.605006	0.00611638	-0.0436223	0.185625	2.312e-35	1625700000	527090000	1098600000	3	5	6	3	4	5	6	5	5	4	4	5	3	4	5	2	3	3	8	19.5	19.5	51.893	0	-0.0991916
NIT1	Nitrilase homolog 1	Q86X76-2;Q86X76-4;Q86X76;Q86X76-3;Q86X76-5	Q86X76-2;Q86X76-4;Q86X76;Q86X76-3;Q86X76-5	0.119757	0.198049	0.228063	0.129901	0.121899	0.183087	-0.189879	-0.19793	-0.033114	-1.80232	-1.53625	-1.64406	-2.74415	-3.00803	-2.87715	-0.209781	-0.140924	-0.333351	3.4079e-88	1716100000	920650000	795430000	6	5	6	8	6	6	8	8	8	4	4	3	3	4	5	5	3	5	11	49.8	49.8	31.858	0	-0.0681479
DNAJC10	DnaJ homolog subfamily C member 10	Q8IXB1;Q8IXB1-2;Q8IXB1-3;E7EP04;A0A087WXH7;H7C1G0	Q8IXB1;Q8IXB1-2	0.54218	0.240416	0.213575	-0.127638	-0.0430762	-0.0157872	-0.186592	-0.231797	0.0877384	-0.182976	-0.2252	-0.298488	-0.738883	-0.624834	-0.880634	0.0967704	0.0762905	0.244105	6.6605e-85	2543100000	1519700000	1023300000	14	10	9	11	9	10	12	8	12	11	7	12	10	9	10	12	7	11	16	22.4	22.4	91.079	0	-0.283492
PNPLA6	Neuropathy target esterase	Q8IY17-2;Q8IY17-3;Q8IY17;Q8IY17-4;Q8IY17-5;M0QYF5;M0QZK5;M0R2H4;M0R2K2;M0QYT1;M0R2C2	Q8IY17-2;Q8IY17-3;Q8IY17;Q8IY17-4;Q8IY17-5	0.359307	0.145657	0.131517	0.141339	0.0996537	0.652145	NaN	0.298448	NaN	-0.789628	NaN	-0.873835	NaN	-1.47404	NaN	NaN	NaN	NaN	1.9344e-21	146280000	88484000	57792000	5	3	3	4	3	2	0	2	1	2	1	2	0	2	0	1	0	1	7	5.5	5.5	146.21	0	-0.00431748
VKORC1L1	Vitamin K epoxide reductase complex subunit 1-like protein 1	Q8N0U8;Q8N0U8-2	Q8N0U8;Q8N0U8-2	0.308267	0.349303	0.412773	0.271952	0.232799	0.348096	0.0193703	-0.0123973	0.0402535	-2.27718	-2.24664	-2.01133	-4.88286	-4.6733	-4.49	0.167275	0.256718	0.218907	1.2376e-21	3365800000	1796700000	1569100000	5	5	5	5	5	5	5	4	5	4	5	5	3	4	3	4	3	5	5	21.6	21.6	19.835	0	-0.0773515
NUP93	Nuclear pore complex protein Nup93	Q8N1F7;H3BVG0;Q8N1F7-2;H3BRI8;H3BM93;H3BPA9;H3BV11;H3BNN5;H3BP95;H3BMX0;H3BV15;H3BVE2;H3BRD9;H3BNG7	Q8N1F7;H3BVG0;Q8N1F7-2	0.380081	0.361438	0.361752	0.529706	0.531325	0.487438	0.373027	0.41591	0.37704	-0.268669	-0.324126	-0.279042	-0.749142	-0.65846	-0.746951	-0.0269531	0.0232438	-0.00531566	1.1656e-266	6503100000	3458800000	3044300000	23	24	15	25	20	23	25	17	22	22	17	20	20	20	22	13	8	12	37	52.7	52.7	93.487	0	0.167954
SRBD1	S1 RNA-binding domain-containing protein 1	Q8N5C6;Q8N5C6-2	Q8N5C6;Q8N5C6-2	NaN	NaN	NaN	NaN	-0.271284	0.152309	NaN	NaN	0.0501677	NaN	NaN	NaN	NaN	-1.02613	NaN	NaN	NaN	NaN	1.093e-07	44881000	24342000	20539000	0	0	1	1	2	2	0	1	3	0	0	0	1	2	0	0	0	0	4	3.8	3.8	111.77	NaN	NaN
PTGR2	Prostaglandin reductase 2	Q8N8N7;G3V3Y1;Q8N8N7-2;G3V2R9	Q8N8N7;G3V3Y1;Q8N8N7-2;G3V2R9	-0.127174	NaN	0.286135	-0.0703686	-0.153293	-0.152122	-0.197662	NaN	-0.101205	NaN	NaN	-0.41898	NaN	NaN	-0.931309	NaN	NaN	NaN	5.5197e-11	232170000	132330000	99843000	2	0	2	3	3	2	2	1	3	1	1	2	1	0	1	0	1	0	4	12.8	12.8	38.499	0	-0.231603
SERBP1	Plasminogen activator inhibitor 1 RNA-binding protein	Q8NC51-4;Q8NC51-3;Q8NC51-2;Q8NC51	Q8NC51-4;Q8NC51-3;Q8NC51-2;Q8NC51	-0.306585	NaN	-0.285247	0.0108382	-0.100537	-0.337367	0.0673246	NaN	-0.189372	0.143735	0.185981	-0.0884052	NaN	NaN	NaN	0.14253	NaN	0.0310821	1.8692e-38	222070000	136380000	85693000	2	1	2	2	2	2	2	1	2	3	2	3	0	0	1	2	1	2	5	14.5	14.5	42.426	0	0.195379
GSTCD	Glutathione S-transferase C-terminal domain-containing protein	Q8NEC7;Q8NEC7-3;D6R9W2;D6RCC4;D6RCC9	Q8NEC7;Q8NEC7-3;D6R9W2	0.395539	0.44316	0.347033	-0.379221	-0.386419	-0.423094	-2.84204	-3.23744	-3.32797	-4.70783	-3.22069	-4.96065	NaN	NaN	-4.6363	-0.108687	0.0643102	-0.0277779	6.5429e-179	3248600000	1738200000	1510400000	16	10	14	13	10	10	8	3	5	3	5	4	4	3	4	12	11	11	19	38.4	38.4	71.078	0	-0.781958
HM13	Minor histocompatibility antigen H13	Q8TCT9-5;Q8TCT9;A0A075B6F6;Q8TCT9-4;Q8TCT9-2;A0A0C4DGU3	Q8TCT9-5;Q8TCT9;A0A075B6F6;Q8TCT9-4;Q8TCT9-2	0.242451	-0.0753312	0.155259	0.104195	0.175116	0.0885514	0.162249	0.0301308	0.0423701	0.173181	0.131255	0.229875	0.426898	0.287745	0.0589861	-0.0628416	0.197611	0.00136334	8.3061e-133	1341300000	887880000	453460000	4	3	2	4	5	5	4	2	4	5	4	4	4	5	5	4	2	4	5	18.5	18.5	36.813	0	-0.0510647
NEK9	Serine/threonine-protein kinase Nek9	Q8TD19;G3V459	Q8TD19	1.04988	0.470417	0.590316	0.50962	0.608737	0.460735	0.177537	0.101389	0.293459	-0.976241	-1.15546	-1.13566	-1.57306	-1.5394	-1.17956	0.0196236	-0.0521865	-0.367858	8.4473e-26	383910000	234630000	149290000	5	5	5	5	6	5	5	3	4	2	3	4	3	4	2	2	2	3	7	9.6	9.6	107.17	0	-0.0806959
GPX8	Probable glutathione peroxidase 8;Glutathione peroxidase	Q8TED1;E7ETY7;J3KNB5	Q8TED1;E7ETY7	0.0137993	-0.0452359	0.00217574	-0.098759	0.0813893	0.264321	-0.0596759	-0.0785639	-0.0106269	-0.13805	-0.256605	NaN	NaN	-0.167207	-0.581705	-0.319952	-0.169693	-0.174218	8.182e-21	637160000	379820000	257340000	3	3	3	2	2	2	4	2	2	3	3	2	1	2	3	5	4	5	5	23.4	23.4	23.881	0	0.0792136
GEMIN5	Gem-associated protein 5	Q8TEQ6	Q8TEQ6	NaN	NaN	NaN	NaN	NaN	NaN	NaN	NaN	NaN	-0.140987	NaN	NaN	NaN	0.231399	0.326889	NaN	NaN	NaN	1.5237e-14	84788000	57835000	26953000	1	0	1	1	0	0	1	1	1	2	0	1	1	4	3	1	0	0	5	3.6	3.6	168.59	NaN	NaN
IPO4	Importin-4	Q8TEX9;Q8TEX9-2;H0YN14;H0YMR4;H0YN07;H0YLV0;H0YL92;H0YK93;H0YKG5	Q8TEX9;Q8TEX9-2;H0YN14	0.877685	0.687597	0.629335	0.922694	1.29008	1.16577	0.914724	1.36892	0.85772	0.387985	0.413149	0.529578	0.679779	0.695535	0.420045	0.309344	NaN	0.453973	3.3464e-173	920260000	659810000	260450000	7	5	5	7	4	4	4	2	4	9	7	11	11	8	9	3	1	6	15	17.4	17.4	118.71	0	0.478174
USP33	Ubiquitin carboxyl-terminal hydrolase 33	Q8TEY7-2;Q8TEY7;Q8TEY7-3;E9PQP0;H0YCV3;E9PP47;E9PLK7;H0YD08	Q8TEY7-2;Q8TEY7;Q8TEY7-3;E9PQP0	0.638581	0.503551	0.52312	-0.328899	-0.213899	-0.10269	-2.44277	-2.72015	-2.24315	-3.25406	NaN	NaN	-3.65418	NaN	NaN	0.190151	0.159647	0.186016	6.1472e-79	881870000	521450000	360420000	10	7	6	8	8	9	2	2	2	2	1	1	2	1	0	7	2	8	12	19	19	103.28	0	-0.737019
PHF10	PHD finger protein 10	S5FZ81;Q8WUB8-3;Q8WUB8-2;Q8WUB8	S5FZ81;Q8WUB8-3;Q8WUB8-2;Q8WUB8	NaN	NaN	NaN	NaN	NaN	NaN	NaN	NaN	NaN	NaN	-0.811371	-0.64498	-0.46378	NaN	-0.815919	NaN	NaN	NaN	3.5004e-11	84298000	43031000	41267000	1	0	1	1	1	1	1	0	0	1	2	2	2	0	2	0	1	0	3	8	8	42.612	NaN	NaN
C12orf23	UPF0444 transmembrane protein C12orf23	Q8WUH6	Q8WUH6	-0.525639	-0.628698	-0.51762	-0.419645	-0.620776	-0.513341	-0.313643	-0.307427	-0.298234	0.166841	0.105276	-0.0991331	0.0209713	-0.130132	0.135809	NaN	-0.200016	NaN	1.0939e-32	820720000	478040000	342680000	4	4	4	4	4	4	3	4	4	3	3	4	2	2	3	1	2	0	4	49.1	49.1	11.748	0	0.0122977
PDCD6IP	Programmed cell death 6-interacting protein	Q8WUM4;Q8WUM4-2;Q8WUM4-3;C9IZF9;F8WEQ7;F8WBR8;F8WDK9	Q8WUM4;Q8WUM4-2	-0.0347485	-0.0541788	-0.165147	0.0174065	0.212717	-0.0884025	0.170231	0.036015	0.209895	0.164856	0.248323	0.207891	0.395276	0.508159	0.432307	0.256147	-0.0570489	0.34383	7.3077e-127	1396700000	938930000	457730000	7	5	8	6	9	9	8	6	8	10	12	14	16	12	13	3	6	4	21	27.3	27.3	96.022	0	0.0715853
ATXN2L	Ataxin-2-like protein	Q8WWM7-6;Q8WWM7-8;Q8WWM7-5;Q8WWM7-4;Q8WWM7-9;Q8WWM7-2;Q8WWM7;Q8WWM7-3;H3BUF6;H3BSQ5;H3BUE3;H3BSK9;Q8WWM7-7;H3BRB0;A0A0C4DGL7	Q8WWM7-6;Q8WWM7-8;Q8WWM7-5;Q8WWM7-4;Q8WWM7-9;Q8WWM7-2;Q8WWM7;Q8WWM7-3;H3BUF6	0.841659	NaN	NaN	NaN	NaN	NaN	NaN	NaN	0.97492	NaN	0.119075	0.189764	NaN	NaN	0.335408	0.371564	NaN	NaN	1.6572e-20	162990000	115130000	47863000	2	1	1	1	1	2	1	0	2	1	2	2	1	2	4	2	0	1	7	9.5	9.5	102.89	0	NaN
PALLD	Palladin	Q8WX93-3;Q8WX93;Q8WX93-4;Q8WX93-8;Q8WX93-5;Q8WX93-7;Q8WX93-2;Q8WX93-9;H0YA05;D6R9F5;F8WA26;A0A087WX60;Q86TC9-2;Q86TC9	Q8WX93-3;Q8WX93;Q8WX93-4;Q8WX93-8;Q8WX93-5;Q8WX93-7;Q8WX93-2;Q8WX93-9	-0.300713	-0.381743	-0.334064	-0.625929	-0.50708	-0.789961	-0.782768	-0.418068	-0.491927	0.363752	0.29946	0.0771976	0.356614	0.367871	0.357131	0.0315802	-0.238083	0.0920797	1.0551e-68	935470000	603160000	332310000	4	2	3	4	4	4	4	3	4	7	8	7	7	7	7	3	4	5	9	11.3	11.3	108.63	0	-0.291865
DNAJC9	DnaJ homolog subfamily C member 9	Q8WXX5	Q8WXX5	NaN	-0.127183	NaN	NaN	NaN	NaN	-0.230432	NaN	NaN	NaN	NaN	NaN	0.825862	0.319505	NaN	NaN	NaN	NaN	4.177e-08	64873000	41132000	23742000	0	2	1	1	1	1	2	0	0	1	0	1	2	2	1	0	0	0	2	7.7	7.7	29.909	0	NaN
DDB2	DNA damage-binding protein 2	Q92466;A0A087WYT8;A0A087X0X5;Q92466-2;Q92466-5;Q92466-4;Q92466-3;A0A087WW71	Q92466;A0A087WYT8;A0A087X0X5;Q92466-2;Q92466-5;Q92466-4	NaN	NaN	NaN	NaN	NaN	NaN	NaN	NaN	NaN	0.785384	NaN	0.399236	0.799925	0.594753	NaN	NaN	NaN	NaN	1.1774e-11	96656000	70871000	25786000	0	0	1	0	0	0	0	0	0	2	0	2	3	2	0	0	0	0	4	12.4	12.4	47.863	NaN	NaN
HSPH1	Heat shock protein 105 kDa	Q92598-2;Q92598;Q92598-4;Q92598-3;A0A0A0MSM0;R4GN69;D6RJ96;E9PDE8;O95757;Q5TBM3	Q92598-2;Q92598;Q92598-4;Q92598-3;A0A0A0MSM0	0.585298	-0.124241	NaN	-0.291746	-0.599874	NaN	NaN	NaN	-0.137613	0.281588	0.141747	-0.0876954	0.150953	0.248437	0.021291	NaN	NaN	-0.444589	1.5773e-120	689870000	403580000	286290000	3	3	2	2	2	1	1	0	2	6	4	11	7	8	10	1	0	2	15	25.3	23.6	92.115	0	-0.676339
GCN1L1	Translational activator GCN1	Q92616	Q92616	0.283595	NaN	-0.0173797	0.300037	-0.663485	0.81685	0.572709	-0.459079	-0.421911	0.516966	-0.22725	NaN	-0.266895	0.181741	-0.0448969	NaN	-0.280064	NaN	2.3885e-32	232450000	156290000	76159000	2	0	2	4	2	3	2	2	3	4	4	1	2	2	3	1	2	1	8	3.9	3.9	292.75	0	0.16693
NUP205	Nuclear pore complex protein Nup205	Q92621;U3KPX2	Q92621	NaN	NaN	NaN	NaN	NaN	NaN	NaN	NaN	NaN	NaN	NaN	NaN	-1.06115	-1.93213	NaN	NaN	NaN	NaN	3.6384e-12	72079000	18212000	53867000	0	0	0	0	0	0	0	0	1	1	0	0	2	4	0	0	0	0	5	4.1	4.1	227.92	NaN	NaN
UPF1	Regulator of nonsense transcripts 1	Q92900-2;Q92900	Q92900-2;Q92900	NaN	NaN	NaN	NaN	NaN	NaN	NaN	NaN	NaN	NaN	NaN	NaN	0.367409	NaN	0.127839	NaN	NaN	NaN	5.9516e-06	21462000	13293000	8168600	0	0	0	0	0	0	0	0	1	0	0	1	2	1	2	0	0	0	2	1.9	1.9	123.03	NaN	NaN
TNPO1	Transportin-1	Q92973-2;Q92973;Q92973-3;E7EW37	Q92973-2;Q92973;Q92973-3	NaN	NaN	NaN	NaN	NaN	NaN	NaN	NaN	NaN	NaN	NaN	-0.0207433	0.0525917	0.234582	NaN	NaN	NaN	NaN	1.6348e-24	85480000	54790000	30690000	0	0	1	1	0	0	1	0	0	1	0	4	3	2	1	0	0	0	6	10.4	10.4	101.31	NaN	NaN
USP9X	Probable ubiquitin carboxyl-terminal hydrolase FAF-X	Q93008-1;Q93008;O00507-2;O00507	Q93008-1;Q93008	0.0201771	NaN	0.111563	0.111925	0.00111733	0.260968	NaN	0.410167	NaN	0.367398	0.366837	0.13923	0.0389034	0.488326	0.103052	NaN	NaN	-0.978272	7.1591e-38	250250000	155620000	94636000	3	1	2	2	3	2	1	2	1	3	3	3	5	7	3	1	1	2	8	3.3	3.3	290.46	0	0.0460551
USP7	Ubiquitin carboxyl-terminal hydrolase 7;Ubiquitin carboxyl-terminal hydrolase	Q93009-3;Q93009;H3BND8;F5H2X1	Q93009-3;Q93009;H3BND8	0.252464	0.225663	0.112192	0.399143	0.359895	0.193641	0.306217	0.393867	0.278663	-0.0744075	-0.0311536	0.0686315	-0.317859	-0.420486	-0.300003	0.054718	-0.0234461	0.0817166	5.5362e-39	910920000	567360000	343570000	7	4	5	7	4	6	6	4	5	6	6	7	6	8	6	7	5	7	12	11.6	11.6	126.27	0	0.134233
LRRC59	Leucine-rich repeat-containing protein 59	Q96AG4	Q96AG4	NaN	NaN	NaN	NaN	NaN	NaN	NaN	NaN	NaN	0.194105	NaN	0.144915	0.130582	0.130101	NaN	NaN	NaN	NaN	4.1036e-10	87419000	58802000	28616000	0	0	0	0	0	1	0	1	0	2	0	3	2	2	1	0	0	0	3	9.4	9.4	34.93	NaN	NaN
EFHD2	EF-hand domain-containing protein D2	Q96C19;H0Y4Y4;A0A087X1Z2;Q9BUP0-2;Q9BUP0;C9JTV4;Q8WYH2	Q96C19;H0Y4Y4	0.418188	0.40085	0.622153	0.147363	0.352376	0.273205	0.177963	0.431686	0.408208	0.480121	0.582554	0.0288024	0.405701	0.388527	0.497395	0.221563	NaN	0.167325	6.5599e-39	393110000	266180000	126930000	3	3	2	4	2	3	4	2	3	4	3	2	4	4	4	3	1	2	5	23.8	23.8	26.697	0	-0.144983
ISOC1	Isochorismatase domain-containing protein 1	Q96CN7;D6RGE2	Q96CN7;D6RGE2	0.49164	0.554704	0.487179	0.691176	0.764132	0.734988	0.856936	0.492766	0.548264	-0.318663	-0.206532	-0.327599	-1.50315	-1.44124	-1.5325	0.0841415	-0.000300705	-0.0342566	8.4093e-156	4779300000	3015300000	1764000000	10	7	8	8	8	9	9	7	9	10	8	9	8	6	7	7	8	7	12	60.1	60.1	32.236	0	0.243347
TUBGCP3	Gamma-tubulin complex component 3	Q96CW5-2;Q96CW5;Q96CW5-3;A0A087WWB5;A0A087WU06;A0A087WZV5	Q96CW5-2;Q96CW5;Q96CW5-3;A0A087WWB5;A0A087WU06	0.26043	NaN	NaN	NaN	NaN	NaN	NaN	NaN	NaN	0.71882	NaN	0.415975	0.127585	-0.206495	0.310165	NaN	NaN	NaN	7.3914e-14	70275000	44940000	25336000	2	0	1	0	0	0	0	0	0	3	0	2	3	3	2	0	0	0	5	6.7	6.7	93.884	0	NaN
CMBL	Carboxymethylenebutenolidase homolog	Q96DG6	Q96DG6	NaN	NaN	1.34481	0.605443	0.402311	0.318142	NaN	NaN	-2.48456	NaN	NaN	NaN	NaN	NaN	NaN	0.164659	0.0660637	-0.086899	3.8414e-16	116510000	76070000	40439000	1	1	3	2	2	4	0	1	2	1	1	1	1	0	0	2	2	2	7	27.8	27.8	28.048	0	-0.942503
TRMT61A	tRNA (adenine(58)-N(1))-methyltransferase catalytic subunit TRMT61A	Q96FX7;H0Y2Q1	Q96FX7;H0Y2Q1	0.710156	0.851098	NaN	NaN	0.939629	0.462873	0.832531	NaN	1.50559	0.259154	0.220113	0.082147	-0.510413	-0.0902371	-0.141679	0.796906	NaN	0.601271	7.3077e-29	465040000	309260000	155780000	5	2	1	1	4	4	2	0	2	4	2	6	4	2	3	2	0	2	6	31.1	31.1	31.381	0	-0.0793755
MYO19	Unconventional myosin-XIX	Q96H55-3;Q96H55	Q96H55-3;Q96H55	NaN	NaN	NaN	NaN	NaN	NaN	NaN	NaN	NaN	NaN	NaN	NaN	0.370491	0.228611	NaN	NaN	NaN	NaN	2.8605e-05	23941000	15279000	8661800	0	0	0	0	0	0	0	0	0	1	1	0	2	2	1	0	0	0	2	3.5	3.5	71.7	NaN	NaN
FUBP3	Far upstream element-binding protein 3	Q96I24;Q96I24-2	Q96I24	NaN	NaN	NaN	NaN	-0.351245	NaN	NaN	NaN	NaN	0.0771452	-0.375897	-0.018433	0.0484716	-0.0535548	-0.149594	NaN	NaN	NaN	1.5874e-17	221370000	136070000	85298000	0	0	1	1	2	1	1	1	0	3	2	2	3	2	2	0	0	0	3	7.9	7.9	61.64	NaN	NaN
AJUBA	LIM domain-containing protein ajuba	Q96IF1;H0YJL9	Q96IF1;H0YJL9	NaN	NaN	NaN	NaN	NaN	NaN	NaN	NaN	NaN	NaN	NaN	NaN	0.411764	NaN	0.758758	NaN	NaN	NaN	4.3047e-06	26342000	17758000	8584200	0	0	0	0	0	0	0	0	0	1	1	1	2	1	2	0	0	0	2	5.4	5.4	56.933	NaN	NaN
TMX3	Protein disulfide-isomerase TMX3	Q96JJ7;Q96JJ7-2;B4DIE3;H3BPB3;H3BT89;H3BVI1	Q96JJ7;Q96JJ7-2	0.684824	NaN	NaN	0.141935	0.367383	0.350997	0.185228	0.631496	0.505798	-0.0122188	0.126514	0.310054	-0.1034	-0.292193	-0.245956	0.0474401	NaN	0.224115	1.7106e-28	697300000	442630000	254670000	6	1	1	5	3	5	4	3	4	3	3	5	2	5	3	4	1	2	9	21.4	21.4	51.871	0	-0.333826
PBK	Lymphokine-activated killer T-cell-originated protein kinase	Q96KB5;Q96KB5-2;E5RFX4;E5RIE1	Q96KB5;Q96KB5-2;E5RFX4	NaN	NaN	NaN	NaN	NaN	-0.0722506	NaN	NaN	NaN	0.499997	0.437515	0.258286	0.55994	0.542449	0.375201	NaN	NaN	NaN	6.6921e-22	225150000	157930000	67213000	0	0	0	1	1	2	1	0	1	2	3	6	3	5	3	0	0	0	6	16.5	16.5	36.085	NaN	NaN
KIF16B	Kinesin-like protein KIF16B	Q96L93-6;Q96L93-4;Q96L93;Q96L93-2;Q96L93-5	Q96L93-6;Q96L93-4;Q96L93;Q96L93-2;Q96L93-5	NaN	NaN	NaN	NaN	NaN	NaN	NaN	NaN	NaN	NaN	NaN	NaN	3.23791	4.58917	NaN	NaN	NaN	NaN	0.00035439	11898000000	11824000000	74278000	0	0	0	0	0	0	0	1	0	1	1	0	2	2	1	0	1	0	2	1.8	1.8	147.4	NaN	NaN
FBXL18	F-box/LRR-repeat protein 18	Q96ME1-4;Q96ME1-2;H0Y6I6;Q96ME1;Q96ME1-3	Q96ME1-4;Q96ME1-2;H0Y6I6;Q96ME1	NaN	NaN	NaN	NaN	NaN	NaN	NaN	NaN	NaN	NaN	NaN	-0.0822987	0.203498	NaN	0.31243	NaN	NaN	NaN	5.9848e-17	56328000	38588000	17740000	0	1	0	0	0	1	0	0	0	0	1	2	5	1	2	0	0	0	5	8.5	8.5	78.919	NaN	NaN
MBOAT7	Lysophospholipid acyltransferase 7	Q96N66;Q96N66-3;Q96N66-2;A9C4B8;M0R1Z5;H7C2M4;C9J4E9;A0A0G2JNX6	Q96N66;Q96N66-3;Q96N66-2	0.827324	0.80651	0.676175	0.958917	0.863042	0.834274	1.03615	0.527409	0.93893	0.0910752	0.158656	0.16193	0.251244	0.497467	0.0738597	-0.00543116	-0.00124571	-0.041018	1.9563e-89	1257000000	869640000	387360000	5	5	6	6	6	5	6	4	4	4	4	5	4	4	4	4	4	4	7	21.8	21.8	52.764	0	0.0565322
IPO9	Importin-9	Q96P70	Q96P70	NaN	NaN	-0.282983	NaN	NaN	NaN	NaN	NaN	NaN	NaN	NaN	0.264649	0.17677	NaN	0.1112	NaN	NaN	NaN	9.6198e-19	79773000	52578000	27195000	1	0	2	1	1	1	1	0	1	1	1	4	2	1	2	0	0	0	5	6.1	6.1	115.96	0	NaN
VPS35	Vacuolar protein sorting-associated protein 35	Q96QK1	Q96QK1	NaN	NaN	NaN	-0.0577776	NaN	NaN	NaN	NaN	NaN	-0.191588	NaN	0.247003	0.00131142	NaN	-0.0120381	NaN	NaN	NaN	3.8279e-24	118390000	65823000	52571000	0	0	0	2	0	0	0	0	0	2	1	4	4	1	3	0	0	0	8	12.1	12.1	91.706	NaN	NaN
SPAG5	Sperm-associated antigen 5	Q96R06;K7ELC8;J3KTQ0;E9PMD0	Q96R06;K7ELC8;J3KTQ0;E9PMD0	NaN	NaN	NaN	NaN	NaN	NaN	NaN	NaN	NaN	-0.0329923	NaN	NaN	-0.379665	0.1461	NaN	NaN	NaN	NaN	1.0915e-06	39363000	25835000	13528000	0	0	0	0	0	0	0	0	0	2	1	1	2	2	1	0	0	0	2	2.3	2.3	134.42	NaN	NaN
MCCC1	Methylcrotonoyl-CoA carboxylase subunit alpha, mitochondrial	Q96RQ3;E9PHF7;F5GYT8;E9PG35;G5E9X5;F8WDI3	Q96RQ3;E9PHF7;F5GYT8;E9PG35;G5E9X5	1.74138	1.94905	1.87697	2.14714	2.00787	1.92396	2.20521	2.28441	1.94712	1.80238	1.64843	1.97995	1.94721	1.81105	1.85787	1.81822	1.92965	1.9417	0	11405000000	9491100000	1913400000	22	20	19	20	18	18	21	18	22	21	17	20	18	18	17	18	18	17	28	51.4	51.4	80.472	0	0.130895
SIN3A	Paired amphipathic helix protein Sin3a	Q96ST3;H3BP90	Q96ST3	NaN	NaN	NaN	NaN	NaN	NaN	NaN	NaN	NaN	-0.325738	0.149653	NaN	0.378935	NaN	0.0559031	NaN	NaN	NaN	1.2948e-18	161820000	87181000	74635000	1	2	0	2	0	1	2	1	1	6	4	1	5	2	6	1	1	1	8	6.7	6.7	145.17	NaN	NaN
CRBN	Protein cereblon	Q96SW2-2;Q96SW2;J3QT87;J3QT51	Q96SW2-2;Q96SW2;J3QT87	-0.0216396	0.0252229	-0.263473	-0.0768425	-0.189512	-0.0221966	-0.407044	-0.229984	-0.245326	-2.09433	-2.13112	-2.13483	-3.82448	-3.95158	-5.68539	-0.679626	-0.470712	-0.570896	1.1991e-61	1495900000	767870000	728080000	13	7	7	9	7	10	9	4	8	5	5	4	3	2	5	9	4	6	15	42.9	42.9	50.474	0	-0.0552029
MMS19	MMS19 nucleotide excision repair protein homolog	Q96T76-9;Q96T76;Q96T76-8;Q96T76-5;H0Y746;H7C1W5;Q5T454;Q96T76-7;H0Y7V3;H7C0A9;F8WCH8;B0QZ77	Q96T76-9;Q96T76;Q96T76-8;Q96T76-5	0.695485	0.458003	0.337058	0.359188	0.336724	0.32847	0.133806	0.435103	0.815584	0.492263	0.74577	0.348264	0.487417	0.635049	0.431772	0.0420354	-0.0495935	-0.0816489	1.605e-125	1037900000	651790000	386080000	10	3	6	8	6	6	8	3	5	7	3	7	9	7	6	4	2	3	17	21.3	21.3	108.38	0	-0.121279
PARK7	Protein DJ-1	Q99497;K7ELW0;K7EN27	Q99497;K7ELW0	0.716647	0.540713	0.680781	0.82209	0.893662	0.851865	0.968136	-0.292807	0.660543	0.85188	0.754203	0.764274	0.843838	0.78191	0.792768	0.09081	0.31268	0.0772149	1.0603e-53	1851500000	1367400000	484110000	5	5	4	5	6	6	6	2	4	8	5	6	6	4	7	5	3	4	9	56.6	56.6	19.891	0	0.171083
VAT1	Synaptic vesicle membrane protein VAT-1 homolog	Q99536;Q99536-2;Q99536-3;K7EJM4;K7ESA3;K7ERT7;K7ENX2;K7EM19	Q99536;Q99536-2;Q99536-3;K7EJM4	NaN	NaN	NaN	NaN	NaN	NaN	NaN	NaN	NaN	0.274326	0.587314	0.762551	0.386851	0.249028	NaN	NaN	NaN	NaN	1.4782e-17	100590000	69803000	30789000	1	1	0	0	0	0	0	0	0	2	3	4	2	3	0	0	0	0	4	10.7	10.7	41.92	NaN	NaN
NUP88	Nuclear pore complex protein Nup88	Q99567;J3KMX1;I3L4K7;I3L245;I3L2W3	Q99567;J3KMX1	0.181785	0.0739515	0.259059	-0.0734505	0.0256399	-0.0819146	-0.61764	-0.104685	-0.00328718	-0.197682	-0.301739	-0.121094	-0.579585	-0.350521	-0.283321	-0.00198511	-0.12148	0.172891	1.0468e-70	555740000	337410000	218330000	4	2	2	3	4	4	3	3	2	4	3	4	4	3	4	4	4	6	8	17	17	83.541	0	-0.255235
POP1	Ribonucleases P/MRP protein subunit POP1	Q99575	Q99575	NaN	NaN	NaN	NaN	NaN	NaN	NaN	NaN	NaN	0.181898	0.235631	0.173474	NaN	0.332881	0.345288	NaN	NaN	NaN	1.633e-08	77123000	49218000	27905000	0	0	0	0	0	0	0	0	0	2	2	2	1	2	2	0	0	0	2	3.3	3.3	114.71	NaN	NaN
TEAD3	Transcriptional enhancer factor TEF-5	Q99594;H7C4A7;B5MCM0	Q99594	0.242956	0.134037	NaN	0.191305	0.0392632	0.107131	0.0798899	NaN	NaN	-0.733432	0.0816018	-0.277583	-0.717715	-0.497706	-0.581847	0.621008	NaN	NaN	3.6735e-18	310830000	193680000	117150000	3	2	1	2	3	2	3	1	1	3	2	3	3	3	3	2	1	1	2	8.5	8.5	48.676	0	-0.0813653
KIF2C	Kinesin-like protein KIF2C	Q99661-2;Q99661;Q5JR91;Q5JR89	Q99661-2;Q99661;Q5JR91;Q5JR89	NaN	NaN	NaN	NaN	NaN	NaN	NaN	NaN	NaN	0.621949	0.49634	0.647549	0.639833	0.385022	0.523127	NaN	NaN	NaN	5.5633e-43	198970000	131050000	67917000	1	0	1	0	0	1	1	1	1	3	4	2	5	4	3	1	0	0	8	14.6	14.6	75.561	NaN	NaN
HSD17B10	3-hydroxyacyl-CoA dehydrogenase type-2	Q99714;Q5H928;Q99714-2	Q99714;Q5H928;Q99714-2	NaN	NaN	NaN	NaN	NaN	NaN	NaN	NaN	NaN	0.126777	NaN	0.0764567	0.264423	NaN	0.194623	NaN	NaN	NaN	2.8233e-22	99206000	62416000	36790000	0	0	0	1	0	0	0	0	0	2	1	4	3	1	3	0	0	1	6	39.1	39.1	26.923	NaN	NaN
SLC29A1	Equilibrative nucleoside transporter 1	Q99808;Q99808-2	Q99808;Q99808-2	NaN	NaN	NaN	NaN	NaN	NaN	NaN	NaN	NaN	0.0616328	0.264906	0.429928	NaN	0.278798	0.45258	NaN	NaN	NaN	7.194e-09	103830000	69302000	34533000	0	1	1	0	1	0	1	1	0	2	2	2	1	2	2	0	0	0	2	5	5	50.219	NaN	NaN
CCT7	T-complex protein 1 subunit eta	Q99832;Q99832-3;Q99832-4;Q99832-2;F8WAM2;F8WBP8	Q99832;Q99832-3;Q99832-4;Q99832-2	0.108289	-0.299537	-0.35593	-0.280614	-0.224276	-0.250187	-0.17627	-0.0345764	-0.389865	-0.101913	-0.123086	-0.0936085	-0.0123396	-0.228814	-0.181223	0.260762	NaN	0.326177	3.3228e-142	1295800000	785660000	510100000	4	4	2	4	3	4	7	5	4	10	7	14	9	7	8	2	1	3	16	35.9	35.9	59.366	0	0.04935
NCAPG	Condensin complex subunit 3	Q9BPX3;H0Y9Z8	Q9BPX3	NaN	NaN	NaN	NaN	NaN	NaN	NaN	NaN	NaN	NaN	NaN	NaN	NaN	-0.159656	0.146309	NaN	NaN	NaN	7.9764e-15	41679000	28341000	13338000	0	0	0	0	0	0	0	0	0	1	1	1	0	2	2	0	0	0	4	5.2	5.2	114.33	NaN	NaN
TXNDC17	Thioredoxin domain-containing protein 17	Q9BRA2;I3L2R6;I3L0K2;I3L3M7	Q9BRA2;I3L2R6;I3L0K2;I3L3M7	-0.257069	-0.328102	-0.058009	-1.49442	-1.08221	-1.16766	-1.50039	-1.76952	NaN	-0.961911	-0.992373	-1.01287	-2.76268	-2.32066	-2.39373	-0.387182	NaN	NaN	2.7446e-40	993050000	450500000	542550000	4	2	3	4	4	4	4	3	1	4	2	4	3	2	3	3	0	1	4	42.3	42.3	13.941	0	-0.910593
ERP44	Endoplasmic reticulum resident protein 44	Q9BS26	Q9BS26	0.277196	-0.088571	0.166041	0.299214	0.773954	0.434588	0.346404	0.444385	0.27795	0.195291	0.70204	0.312152	0.572024	0.293492	0.33061	0.0547778	NaN	-0.145474	8.4872e-45	614490000	418190000	196310000	6	2	3	4	2	5	4	2	3	3	4	4	4	4	5	4	1	2	8	23.6	23.6	46.971	0	0.268546
ESYT1	Extended synaptotagmin-1	Q9BSJ8;Q9BSJ8-2;F8VZB1	Q9BSJ8;Q9BSJ8-2	-0.34928	-0.24024	NaN	-0.323691	-0.504944	-0.292398	-0.393087	-0.337936	-0.21134	0.0763988	0.589828	0.389659	0.461256	0.119883	0.360523	-0.159062	-0.409677	-0.344452	1.012e-64	766360000	488670000	277690000	6	3	1	6	2	3	5	2	3	9	6	10	11	6	10	4	3	3	14	16.4	16.4	122.85	0	-0.0289308
ALG1	Chitobiosyldiphosphodolichol beta-mannosyltransferase	Q9BT22;K7EID2;Q9BT22-2;K7EPU3	Q9BT22;K7EID2;Q9BT22-2	0.225726	NaN	0.160897	0.453905	NaN	0.635931	NaN	0.395833	0.451951	NaN	NaN	-0.109685	NaN	NaN	NaN	NaN	NaN	NaN	2.0045e-16	83298000	51426000	31872000	2	1	2	2	1	2	1	3	2	1	0	2	1	0	1	1	0	0	4	10.6	10.6	52.518	0	0.351607
DIDO1	Death-inducer obliterator 1	Q9BTC0;Q9BTC0-1	Q9BTC0;Q9BTC0-1	NaN	NaN	NaN	NaN	NaN	NaN	NaN	NaN	NaN	NaN	NaN	NaN	0.229279	NaN	-0.265893	NaN	NaN	NaN	0.00023161	25574000	13333000	12241000	0	0	0	0	0	1	0	0	0	0	1	0	2	1	2	0	0	0	2	1.5	1.5	243.87	NaN	NaN
MCMBP	Mini-chromosome maintenance complex-binding protein	Q9BTE3-2;Q9BTE3;Q9BTE3-3	Q9BTE3-2;Q9BTE3;Q9BTE3-3	0.133988	0.447413	0.612476	0.191775	0.205385	0.224416	0.0208986	NaN	0.23911	0.0439128	-0.141014	-0.142915	-0.0693995	-0.40366	-0.397145	NaN	NaN	NaN	1.1461e-36	475040000	280740000	194300000	6	4	5	4	5	5	4	0	3	5	4	7	4	5	3	1	0	1	10	15.8	15.8	72.748	0	-0.242028
NDC1	Nucleoporin NDC1	Q9BTX1-6;Q9BTX1-5;Q9BTX1-2;Q9BTX1;Q9BTX1-3;Q9BTX1-4	Q9BTX1-6;Q9BTX1-5;Q9BTX1-2;Q9BTX1;Q9BTX1-3	NaN	NaN	NaN	NaN	NaN	NaN	NaN	NaN	NaN	-0.490429	-0.610209	-0.331947	-0.531566	-0.324822	-0.63844	-0.0983971	NaN	NaN	7.8865e-10	141890000	81480000	60406000	0	1	0	1	0	0	1	0	1	3	2	2	2	2	2	2	0	0	3	5	5	63.157	NaN	NaN
MSTO1	Protein misato homolog 1	Q9BUK6-7;Q9BUK6-3;Q9BUK6-2;Q9BUK6;Q9BUK6-5	Q9BUK6-7;Q9BUK6-3;Q9BUK6-2;Q9BUK6	NaN	NaN	NaN	NaN	NaN	NaN	NaN	NaN	NaN	NaN	NaN	NaN	-0.0404642	-0.296543	-0.456411	NaN	NaN	NaN	1.0913e-07	92620000	53336000	39284000	1	0	1	0	0	0	0	0	0	1	1	1	2	3	2	1	1	0	3	6.5	6.5	56.902	NaN	NaN
TNKS1BP1	182 kDa tankyrase-1-binding protein	Q9C0C2;Q9C0C2-2	Q9C0C2	-0.521466	NaN	NaN	NaN	NaN	NaN	NaN	NaN	NaN	0.118906	NaN	0.0149865	NaN	0.344345	0.4342	NaN	NaN	NaN	2.8081e-26	116310000	75974000	40337000	2	0	0	0	1	0	0	0	0	3	1	4	1	2	3	0	0	1	5	3.9	3.9	181.79	0	NaN
UBE2O	Ubiquitin-conjugating enzyme E2 O	Q9C0C9;K7ES11;K7EQ12	Q9C0C9	0.170294	NaN	NaN	NaN	NaN	NaN	NaN	NaN	NaN	0.500534	0.469661	0.437906	NaN	0.348139	NaN	0.0289637	NaN	NaN	2.6029e-26	288770000	196650000	92118000	4	1	1	1	1	1	1	1	1	3	2	3	1	4	1	2	0	1	5	5.9	5.9	141.29	0	NaN
MTMR12	Myotubularin-related protein 12	Q9C0I1-3;Q9C0I1-2;Q9C0I1	Q9C0I1-3;Q9C0I1-2;Q9C0I1	0.19121	NaN	-0.135487	0.055051	NaN	0.287597	-0.0658092	-0.112552	NaN	-0.222803	-0.242586	-0.192141	-0.572825	-0.35701	-0.547944	NaN	NaN	NaN	5.6445e-17	198860000	115490000	83364000	2	1	2	2	1	2	2	2	1	4	3	3	3	3	2	1	0	1	6	10.5	10.5	73.231	0	0.143462
POLR1E	DNA-directed RNA polymerase I subunit RPA49	Q9GZS1-2;E7EX70;Q9GZS1	Q9GZS1-2;E7EX70;Q9GZS1	NaN	-0.099017	-0.194504	NaN	-0.448142	-0.574041	NaN	-0.3305	NaN	-0.475311	NaN	NaN	NaN	NaN	NaN	NaN	NaN	NaN	1.2089e-09	66395000	36077000	30318000	0	2	2	1	2	2	0	2	1	2	1	1	0	1	0	0	0	0	4	8.8	8.8	47.26	0	-0.364331
SMG9	Protein SMG9	Q9H0W8;Q9H0W8-2;M0QZC7;M0R2N0;M0QYR7;M0QZH1;M0QX70;M0R0U0	Q9H0W8;Q9H0W8-2;M0QZC7	0.708015	0.757433	0.769711	0.386183	0.574329	0.521091	-0.208729	-0.0947565	-0.0327981	-2.66546	-2.55174	-2.3427	-2.87789	-4.13127	-3.66902	0.351883	0.487685	0.50114	4.2745e-147	2618600000	1458800000	1159800000	14	11	11	15	13	11	14	8	12	8	4	5	7	5	9	11	9	12	19	48.8	48.8	57.65	0	-0.236342
PNN	Pinin	Q9H307;Q9H307-2;G3V5F0;G3V579	Q9H307;Q9H307-2	0.380993	0.229858	0.105093	-0.256326	-0.399023	-0.471669	-2.8074	-3.01951	-2.9222	-5.32376	-5.35683	-5.18293	-5.39166	-5.09293	-5.32283	-0.0548261	-0.0647533	-0.0540936	0	15776000000	7785300000	7990600000	27	27	26	26	24	24	18	16	18	13	11	13	13	12	13	23	22	21	29	41.3	41.3	81.613	0	-0.62888
TMX1	Thioredoxin-related transmembrane protein 1	Q9H3N1;G3V448	Q9H3N1	0.563848	0.512844	0.498642	0.199282	0.309776	0.340508	-0.218093	-0.143157	-0.0693828	-2.56189	-2.50655	-2.36711	-3.96733	-4.03145	-4.08034	-0.0202123	-0.0117067	-0.0711783	6.3262e-141	21390000000	11401000000	9988900000	18	16	17	18	17	18	18	15	16	13	13	15	8	12	13	16	14	14	18	33.2	33.2	31.791	0	-0.203069
UNC45A	Protein unc-45 homolog A	Q9H3U1-2;Q9H3U1;Q9H3U1-3	Q9H3U1-2;Q9H3U1	0.192602	0.100006	0.291822	-0.169316	-0.160886	NaN	0.0127497	0.319465	0.501673	0.175063	0.0326837	0.569603	0.275866	0.274211	-0.105429	NaN	NaN	NaN	5.1579e-42	241900000	163220000	78678000	3	3	3	3	2	1	3	4	3	5	2	3	6	5	7	0	0	0	12	14.9	14.9	101.67	0	-0.357703
SCAF1	Splicing factor, arginine/serine-rich 19	Q9H7N4	Q9H7N4	-1.26205	-1.51432	-1.39588	-1.70848	-1.85117	-1.80206	-1.60767	-1.47238	-1.51012	-0.839867	-0.909295	-1.18982	-0.881945	-1.11966	-1.19709	-0.661484	-0.984184	-0.672358	8.4605e-87	1493900000	671260000	822650000	8	6	7	7	6	5	4	4	4	11	9	8	8	7	10	9	4	8	13	13	13	139.27	0	-0.406182
PTGES2	Prostaglandin E synthase 2;Prostaglandin E synthase 2 truncated form	Q9H7Z7;A6NHH0;X6RJ95	Q9H7Z7;A6NHH0	0.0460062	0.0829687	0.0274825	-6.22965	-6.32778	-6.35948	-7.22208	-6.63518	-6.35654	-6.80785	-7.84555	-6.5341	-6.89075	-8.84944	-7.0102	-0.180941	-0.0656366	-0.122493	0	63077000000	21667000000	41411000000	21	20	18	18	16	18	17	14	17	16	11	14	16	12	15	19	17	18	23	63.1	63.1	41.943	0	-6.37378
NT5DC2	5-nucleotidase domain-containing protein 2	Q9H857-2;Q9H857;Q9H857-3;Q9H857-4;H7C4G8;H7C519;C9J036	Q9H857-2;Q9H857;Q9H857-3;Q9H857-4	0.384327	0.300487	0.921517	0.631094	0.697186	0.876545	0.842252	0.648569	0.754129	0.390667	0.604339	0.421714	0.518487	0.448593	0.366615	-0.209407	-0.30675	-0.155277	5.5177e-124	1309200000	913580000	395660000	13	5	5	11	7	9	10	2	5	10	5	6	10	5	8	7	2	3	17	39	39	64.144	0	0.312858
C6orf211	UPF0364 protein C6orf211	Q9H993;F5GZY1	Q9H993	NaN	0.362617	-0.0534427	0.530226	0.290826	0.112296	-0.158571	NaN	NaN	0.429824	0.426534	0.247095	0.437714	0.398038	0.469292	0.0423317	NaN	-0.0998876	9.821e-64	518180000	353490000	164690000	1	3	2	2	3	2	2	1	1	4	3	3	3	2	4	3	0	3	8	23.8	23.8	51.172	0	0.136239
PELI2	E3 ubiquitin-protein ligase pellino homolog 2	Q9HAT8	Q9HAT8	NaN	NaN	NaN	NaN	NaN	NaN	-1.09605	-1.14519	NaN	NaN	NaN	NaN	NaN	NaN	NaN	NaN	-0.129576	NaN	1.3627e-28	207620000	100560000	107060000	1	1	1	1	1	1	2	2	1	0	1	1	0	1	1	1	2	1	3	11.9	11.9	46.435	NaN	NaN
XPO5	Exportin-5	Q9HAV4;E2QRM3;H0Y9I3;H0Y3Q8;H0YA57;H0Y3W3	Q9HAV4	0.464159	0.162365	0.0558806	0.321658	0.397108	0.187971	0.181992	0.342468	0.341684	0.473509	0.250137	0.29964	0.493627	0.631234	0.560869	0.185723	NaN	0.346915	4.6839e-78	1123600000	742310000	381300000	9	8	6	8	5	4	9	5	4	11	8	14	11	8	12	4	1	4	16	14.3	14.3	136.31	0	0.159293
CACYBP	Calcyclin-binding protein	Q9HB71-3;Q9HB71	Q9HB71-3;Q9HB71	NaN	NaN	NaN	NaN	NaN	NaN	NaN	NaN	NaN	0.160105	0.0174503	0.430874	NaN	NaN	0.395308	NaN	NaN	NaN	5.8225e-13	118690000	74804000	43882000	0	0	0	0	1	0	0	0	0	3	3	2	1	1	2	0	0	0	3	23.8	23.8	21.228	NaN	NaN
MCCC2	Methylcrotonoyl-CoA carboxylase beta chain, mitochondrial	Q9HCC0-2;Q9HCC0;D6R9R1;D6RDF7;A0A0G2JM88;D6RD67	Q9HCC0-2;Q9HCC0;D6R9R1;D6RDF7;A0A0G2JM88	-0.0252049	-0.492075	0.18103	0.637518	-0.213733	0.119783	0.276645	0.238566	0.559998	-0.144581	-0.075532	-0.183392	0.0815179	-0.366882	-0.226216	NaN	NaN	-0.304227	3.9166e-31	387880000	235290000	152590000	2	2	4	2	2	4	2	3	4	4	2	3	5	6	4	1	1	2	9	22.7	22.7	57.518	0	0.144988
POLD4	DNA polymerase delta subunit 4	Q9HCU8-2;Q9HCU8	Q9HCU8-2;Q9HCU8	0.373517	0.41015	0.350503	0.298266	NaN	NaN	0.347002	0.282272	0.485744	0.241628	0.167988	0.164173	-0.0856535	-0.241682	-0.253676	NaN	NaN	NaN	0.0017891	8271800000	5535600000	2736200000	1	1	1	1	1	1	1	1	1	1	1	1	1	1	1	0	1	0	1	17.7	17.7	8.8679	0	-0.0752519
GOPC	Golgi-associated PDZ and coiled-coil motif-containing protein	Q9HD26-2;Q9HD26;Q9HD26-3;F5H1Y4;A0A0J9YVX5	Q9HD26-2;Q9HD26;Q9HD26-3;F5H1Y4	NaN	NaN	NaN	-0.173768	NaN	0.164698	NaN	0.123522	NaN	NaN	0.715183	NaN	0.828528	0.741607	1.17645	NaN	NaN	NaN	6.3743e-11	85059000	57519000	27540000	1	0	1	2	0	2	1	2	0	0	2	1	2	2	2	0	1	0	3	6.2	6.2	49.721	NaN	NaN
LUC7L;LUC7L2	Putative RNA-binding protein Luc7-like 1;Putative RNA-binding protein Luc7-like 2	Q9NQ29-2;Q9NQ29;B8ZZ10;A8MYV2;Q9NQ29-3;Q9Y383-3;A0A0A6YYC3;Q9Y383-2;Q96HJ9-2;A0A0A6YYJ8;F8WBC1;F2Z322	Q9NQ29-2;Q9NQ29;B8ZZ10;A8MYV2;Q9NQ29-3;Q9Y383-3;A0A0A6YYC3;Q9Y383-2;Q96HJ9-2;A0A0A6YYJ8	NaN	NaN	NaN	NaN	NaN	NaN	NaN	NaN	NaN	NaN	-0.280296	NaN	-0.512707	-0.447695	-0.0903775	NaN	NaN	NaN	2.4596e-18	108760000	62392000	46371000	0	0	0	0	0	0	0	1	0	1	2	1	3	2	2	0	0	1	1	12.3	12.3	38.405	NaN	NaN
TIGAR	Fructose-2,6-bisphosphatase TIGAR	Q9NQ88	Q9NQ88	NaN	0.370931	NaN	0.426316	NaN	0.430502	NaN	NaN	NaN	0.53747	0.573585	0.568175	0.498407	0.856218	0.533465	NaN	NaN	NaN	3.68e-58	308390000	225850000	82535000	1	2	0	2	1	2	1	0	0	3	2	5	3	3	2	1	0	0	5	21.1	21.1	30.062	0	0.0574776
RTN4	Reticulon-4	Q9NQC3-2;F8W914;Q9NQC3-5;Q9NQC3;Q9NQC3-4;Q9NQC3-3;H7C106;Q9NQC3-6	Q9NQC3-2;F8W914;Q9NQC3-5;Q9NQC3;Q9NQC3-4	0.220394	0.109621	0.0708227	0.220992	0.0491592	0.130109	0.215535	0.0770411	0.0194353	-0.187177	-0.183145	-0.160225	-0.60228	-0.662482	-0.764979	0.102941	-0.24381	0.227892	1.9641e-101	4913900000	3072400000	1841600000	6	3	3	5	3	4	5	3	6	7	3	6	6	5	6	5	3	4	7	31.9	31.9	40.317	0	0.020488
NIT2	Omega-amidase NIT2	Q9NQR4;H7C579;F8WF70	Q9NQR4;H7C579	0.411489	0.319566	NaN	0.65729	NaN	0.719823	0.537826	NaN	0.302273	-1.28436	-0.944337	NaN	NaN	NaN	NaN	0.308845	NaN	NaN	3.0027e-35	286390000	180860000	105520000	4	2	1	4	1	3	3	1	2	2	2	1	0	1	1	3	1	1	4	17.4	17.4	30.608	0	0.323029
ANLN	Actin-binding protein anillin	Q9NQW6;Q9NQW6-2;H7C3S1;H7C1C2;H7C1K5;C9JJT6;C9J0G4;H7C0Y6;H7C167	Q9NQW6;Q9NQW6-2	-0.444634	-0.0304967	0.140771	-0.284947	0.081331	-0.177671	-0.621855	-0.213687	-0.0581659	0.250229	0.683596	0.610649	0.710794	0.945114	0.886675	0.563034	0.92552	0.477954	2.1387e-47	446000000	302030000	143970000	3	3	4	2	3	4	3	2	5	5	5	7	4	8	3	3	3	3	18	16.8	16.8	124.2	0	-0.147174
LANCL2	LanC-like protein 2	Q9NS86	Q9NS86	0	NaN	NaN	0.166164	NaN	NaN	NaN	NaN	0.104099	0.442407	0.657301	0.622978	NaN	0.469681	0.533695	NaN	NaN	NaN	1.0084e-16	179310000	121420000	57884000	2	0	1	2	1	0	0	0	3	2	2	2	1	3	2	0	0	1	4	11.8	11.8	50.854	0	0.166164
OCIAD1	OCIA domain-containing protein 1	Q9NX40;D6RDK6;D6RBN5;D6R918;D6RBC5;D6RDI5;D6RA54;D6RC55;D6RG39;D6RIT9;Q9NX40-3;Q9NX40-2;Q9NX40-4	Q9NX40;D6RDK6;D6RBN5	NaN	NaN	NaN	NaN	NaN	NaN	-0.96392	NaN	NaN	-0.132321	-0.674336	0.380519	NaN	NaN	NaN	NaN	NaN	NaN	3.7462e-09	120930000	72810000	48117000	1	1	1	1	1	0	2	1	1	2	2	2	1	1	1	0	0	0	3	14.7	14.7	27.626	NaN	NaN
PPP4R2	Serine/threonine-protein phosphatase 4 regulatory subunit 2	Q9NY27-2;Q9NY27-3;Q9NY27;F8WCA1;H7C559;C9IZ04	Q9NY27-2;Q9NY27-3;Q9NY27	NaN	NaN	0.628908	0.0389821	0.479611	NaN	-0.39835	NaN	NaN	-0.145883	NaN	NaN	NaN	NaN	0.000714153	NaN	0.283041	NaN	4.3649e-14	157840000	81745000	76091000	1	0	2	2	2	1	2	0	0	3	0	0	0	1	2	1	2	0	3	15.3	15.3	40.175	0	-0.369612
FAM120A	Constitutive coactivator of PPAR-gamma-like protein 1	Q9NZB2;Q9NZB2-6;Q9NZB2-4;Q9NZB2-2;Q9NZB2-5;A0A0C4DG79;A0A0C4DH52;Q5T035	Q9NZB2;Q9NZB2-6;Q9NZB2-4;Q9NZB2-2;Q9NZB2-5	0.177302	0.129485	0.230073	0.0399861	0.346719	0.0856381	0.0820821	-0.0103718	0.213332	-0.428928	-0.115459	-0.407511	-0.36665	-0.312722	-0.225107	-0.0013813	-0.016091	0.0602791	1.673e-117	1373400000	813490000	559860000	13	9	11	11	9	11	12	10	12	8	7	10	7	10	9	8	7	6	17	21.4	21.4	121.89	0	-0.0916635
MRPL35	39S ribosomal protein L35, mitochondrial	Q9NZE8;Q9NZE8-2;D3YTC1	Q9NZE8;Q9NZE8-2;D3YTC1	-1.20085	-0.177488	-0.222935	-0.326195	-0.0804109	-0.0767718	0.163621	0.150301	0.00893089	-0.213701	-0.082115	-0.0955092	-0.305012	-0.125098	-0.00720345	-0.14468	-0.100909	0.02494	2.4979e-15	1110500000	592780000	517690000	3	4	4	3	4	4	4	3	4	2	2	2	2	3	2	2	3	2	4	13.8	13.8	21.514	0	0.142524
OGFR	Opioid growth factor receptor	Q9NZT2-2;Q9NZT2;A0A0A0MRN5;A0A087X028;Q4VXW3	Q9NZT2-2;Q9NZT2;A0A0A0MRN5;A0A087X028	0.738885	0.493753	NaN	NaN	NaN	0.801841	0.734565	0.437983	1.11924	0.501535	0.567254	0.215091	0.216143	0.260174	0.422418	NaN	NaN	-0.400032	1.6113e-29	403290000	277030000	126260000	3	3	0	1	1	2	2	2	2	5	4	4	5	5	6	1	1	2	7	17	17	71.423	0	0.185522
PTPLAD1	Very-long-chain (3R)-3-hydroxyacyl-[acyl-carrier protein] dehydratase 3	Q9P035;H3BPZ1;H3BS72;Q9P035-2;H3BRL8;H3BMZ1	Q9P035;H3BPZ1;H3BS72;Q9P035-2	-0.337495	NaN	-0.434503	-0.0480378	NaN	NaN	NaN	NaN	-0.809481	0.160048	NaN	-0.33941	NaN	NaN	0.00193208	NaN	NaN	-0.287322	3.6516e-17	180870000	110040000	70833000	3	1	2	3	0	1	0	1	2	2	1	3	2	1	2	0	0	2	6	19.6	19.6	43.159	0	0.337962
RCC2	Protein RCC2	Q9P258	Q9P258	0.0633692	NaN	-0.0019278	0.00293376	NaN	0.128977	NaN	0.22063	0.120457	0.223782	0.206604	0.201833	0.421796	0.513476	0.45316	NaN	NaN	-0.183667	3.5406e-39	1327300000	394410000	932920000	5	2	2	4	1	5	2	2	4	4	6	3	4	4	5	1	1	2	7	17.8	17.8	56.084	0	0.0352348
BCCIP	BRCA2 and CDKN1A-interacting protein	Q9P287-4;Q9P287-3;Q9P287;Q9P287-2	Q9P287-4;Q9P287-3;Q9P287;Q9P287-2	0.385202	NaN	NaN	NaN	NaN	NaN	NaN	NaN	NaN	0.755382	NaN	0.408358	0.810378	NaN	0.268913	NaN	NaN	NaN	2.0682e-29	145780000	102170000	43610000	2	0	0	0	1	1	0	0	0	2	1	2	2	0	3	0	0	0	3	16.1	16.1	33.242	0	NaN
MALT1	Mucosa-associated lymphoid tissue lymphoma translocation protein 1	Q9UDY8-2;Q9UDY8	Q9UDY8-2;Q9UDY8	NaN	0.440669	0.530797	NaN	NaN	NaN	NaN	NaN	NaN	NaN	-0.0444396	NaN	NaN	NaN	NaN	NaN	NaN	NaN	4.83e-07	79345000	53187000	26157000	1	2	2	1	1	1	1	1	1	0	2	1	0	1	1	0	0	0	2	3.1	3.1	91.08	0	NaN
SRP68	Signal recognition particle subunit SRP68	Q9UHB9-4;Q9UHB9;Q9UHB9-2;Q9UHB9-3	Q9UHB9-4;Q9UHB9;Q9UHB9-2	NaN	NaN	NaN	NaN	NaN	NaN	NaN	NaN	NaN	-0.126846	-0.0657283	-0.257416	-0.860307	-0.52397	-0.805181	NaN	NaN	NaN	7.2982e-22	179160000	100980000	78175000	0	0	0	1	0	0	0	1	0	5	4	5	3	3	4	0	0	0	7	13.2	13.2	66.107	NaN	NaN
CHORDC1	Cysteine and histidine-rich domain-containing protein 1	Q9UHD1;Q9UHD1-2;E9PPQ5;E9PIZ4;E9PSD5;E9PL00;E9PHZ2;E9PIF7	Q9UHD1;Q9UHD1-2;E9PPQ5;E9PIZ4;E9PSD5	NaN	NaN	NaN	NaN	NaN	NaN	NaN	NaN	NaN	0.690566	0.535271	0.323927	0.386736	0.678404	0.586616	-0.144498	NaN	NaN	7.5461e-36	2275400000	306430000	1969000000	1	0	1	1	1	1	1	1	1	3	3	3	5	3	5	2	1	0	9	32.8	32.8	37.489	NaN	NaN
SEPT9	Septin-9	Q9UHD8-7;Q9UHD8-2;Q9UHD8-5;Q9UHD8;K7EK18;K7EL40;Q9UHD8-4;Q9UHD8-9;Q9UHD8-3;Q9UHD8-8;K7ER52;K7EIE4;K7EQD7;K7ELJ9;K7EQ08;K7ER34;K7EIR4;K7EKN4;K7EN52;K7ENQ5;K7EJ51;K7EJZ2;K7ENL0;K7ER14;K7EJL9	Q9UHD8-7;Q9UHD8-2;Q9UHD8-5;Q9UHD8;K7EK18;K7EL40;Q9UHD8-4;Q9UHD8-9;Q9UHD8-3;Q9UHD8-8;K7ER52;K7EIE4;K7EQD7	NaN	NaN	NaN	NaN	NaN	NaN	NaN	NaN	NaN	0.224874	0.211644	0.069505	0.216246	0.206819	0.0538151	NaN	NaN	NaN	2.7977e-33	142640000	91858000	50777000	0	0	1	0	1	0	0	0	0	3	2	3	4	3	2	0	0	0	5	10.8	10.8	63.502	NaN	NaN
DDX20	Probable ATP-dependent RNA helicase DDX20	Q9UHI6;E9PJ60	Q9UHI6;E9PJ60	-0.292606	NaN	NaN	NaN	-0.0320057	-0.354306	-0.116546	NaN	NaN	NaN	NaN	0.514707	NaN	0.503019	0.700125	NaN	NaN	NaN	1.1717e-12	106250000	73877000	32372000	2	0	0	1	2	2	2	0	0	2	1	2	1	3	2	1	0	0	4	6.3	6.3	92.239	0	0.0994506
GGA2	ADP-ribosylation factor-binding protein GGA2	Q9UJY4;B0QYR9;B0QYS0;B0QYS1;A0A087WYN2;B0QYS2;B0QYS3;B0QYR5;J3QRS8;B0QYS5;H3BPI3;J3QRP3;B7Z1E9;H3BMM6;B0QYR6;Q9UJY5-4;Q9UJY5-3;J3KSS7;Q9UJY5;Q9NZ52-4;Q9UJY5-6;Q9NZ52	Q9UJY4	-0.0204391	NaN	0.00782967	NaN	NaN	NaN	NaN	0.229739	NaN	NaN	NaN	NaN	NaN	0.217352	-0.0881895	NaN	NaN	NaN	3.265e-07	92289000	59515000	32774000	2	0	2	1	0	1	0	2	0	1	1	1	1	2	2	0	0	0	3	5.1	5.1	67.15	0	NaN
PRPF19	Pre-mRNA-processing factor 19	Q9UMS4;F5H2I0;F5GY56	Q9UMS4;F5H2I0;F5GY56	NaN	NaN	NaN	NaN	NaN	NaN	NaN	NaN	NaN	NaN	-0.778278	-0.49655	-0.765963	-0.450367	-0.347782	NaN	NaN	NaN	8.4329e-07	85212000	46144000	39068000	1	0	1	1	0	0	0	0	0	1	2	2	2	2	2	0	0	0	2	5	5	55.18	NaN	NaN
USP22	Ubiquitin carboxyl-terminal hydrolase 22	Q9UPT9-2;Q9UPT9;K7ESK0;K7ERX6;J3QS30;A6NNY8	Q9UPT9-2;Q9UPT9;K7ESK0;K7ERX6	0.256933	0.472722	0.649655	NaN	NaN	0.202963	-0.158402	0.00538721	0.499968	-0.645777	-0.749892	-0.466849	-1.33917	-1.11444	-1.16336	0.395147	NaN	0.0187776	8.0161e-15	209660000	123680000	85981000	2	2	2	1	1	2	2	2	4	2	2	2	1	2	2	2	1	2	5	10.3	10.3	58.179	0	-0.269759
SAMD4A	Protein Smaug homolog 1	Q9UPU9-3;Q9UPU9;Q9UPU9-2	Q9UPU9-3;Q9UPU9;Q9UPU9-2	NaN	NaN	NaN	NaN	NaN	NaN	NaN	NaN	NaN	0.491552	0.540159	0.606325	0.994749	0.467348	0.442732	NaN	NaN	NaN	5.9034e-21	102110000	68135000	33980000	0	0	0	0	0	0	0	0	0	3	2	2	3	2	3	1	0	0	3	6.7	6.7	70.095	NaN	NaN
SRRM2	Serine/arginine repetitive matrix protein 2	Q9UQ35;Q9UQ35-2;I3L4D8;I3L182;I3L1I8;Q9UQ35-3;A0A087X1W1;I3L0N7;I3L1C0;I3L3Q8;I3L4U6	Q9UQ35;Q9UQ35-2	0.122042	0.229455	0.0778511	0.209442	0.218257	0.134988	0.346344	0.297988	0.28857	-0.0435501	0.0209362	0.0667773	-0.123477	-0.116684	-0.0553715	0.231871	0.148576	0.300647	0	41107000000	26821000000	14287000000	59	59	55	60	58	59	56	47	52	51	49	43	45	49	50	52	47	50	80	35.7	35.7	299.61	0	0.0874004
NUDC	Nuclear migration protein nudC	Q9Y266;A0A0A0MSS4;A0A0A0MSU9	Q9Y266	NaN	NaN	NaN	NaN	NaN	NaN	NaN	NaN	NaN	0.307312	0.138996	NaN	0.231527	0.281651	0.451639	NaN	NaN	NaN	1.1428e-22	204440000	135950000	68491000	0	0	0	0	0	0	0	0	0	2	3	1	4	4	4	0	1	0	6	19.6	19.6	38.242	NaN	NaN
VDAC3	Voltage-dependent anion-selective channel protein 3	Q9Y277;Q9Y277-2;E5RJN6;E5RHZ6;E5RHE1;E5RFP6;E5RK27;E5RFL1	Q9Y277;Q9Y277-2;E5RJN6;E5RHZ6;E5RHE1;E5RFP6	0.191454	0.35241	0.208506	0.105771	0.18571	0.113359	0.00299355	0.165378	0.180427	0.359109	0.289181	0.103541	0.28198	0.275281	0.169535	0.200336	-0.109579	-0.0116913	6.6895e-152	3591500000	2462700000	1128800000	7	6	5	5	6	4	5	4	3	5	7	8	5	8	7	6	3	5	9	46.6	46.6	30.658	0	-0.0951472
THRAP3	Thyroid hormone receptor-associated protein 3	Q9Y2W1	Q9Y2W1	NaN	NaN	NaN	NaN	NaN	NaN	NaN	NaN	NaN	-0.454419	NaN	-1.15892	-1.0218	NaN	NaN	NaN	NaN	NaN	2.4726e-08	41405000	21061000	20344000	0	0	0	0	0	0	0	0	0	3	1	2	2	2	1	0	0	0	3	3.8	3.8	108.66	NaN	NaN
MTO1	Protein MTO1 homolog, mitochondrial	Q9Y2Z2-5;Q9Y2Z2-4;Q9Y2Z2;Q9Y2Z2-6;Q9Y2Z2-2;H0YBI9;H0YB81;Q9Y2Z2-3;H0YC00;H7C2S9	Q9Y2Z2-5;Q9Y2Z2-4;Q9Y2Z2;Q9Y2Z2-6;Q9Y2Z2-2	NaN	NaN	NaN	1.274	0.620476	NaN	NaN	NaN	1.09262	NaN	NaN	NaN	NaN	NaN	NaN	NaN	NaN	NaN	1.1474e-09	25901000	19015000	6885900	0	0	0	2	3	1	0	1	2	0	0	0	0	0	0	0	1	0	6	8.9	8.9	72.046	NaN	NaN
STRAP	Serine-threonine kinase receptor-associated protein	Q9Y3F4;Q9Y3F4-2;H0YH33	Q9Y3F4;Q9Y3F4-2	-0.0319517	0.158745	-0.029641	0.0519295	-0.247856	-0.126966	-0.0366477	NaN	-0.163292	0.0421943	0.197325	-0.0159391	0.104653	0.182337	0.0745002	-0.533888	NaN	-0.000423789	1.1061e-36	743460000	410550000	332910000	4	2	2	4	3	3	4	1	3	8	4	7	5	7	6	2	1	2	10	32.6	32.6	38.438	0	-0.0973254
C22orf28	tRNA-splicing ligase RtcB homolog	Q9Y3I0	Q9Y3I0	NaN	NaN	-0.515008	NaN	1.09803	NaN	1.49428	NaN	0.491971	0.0514093	0.139424	-0.154416	-0.20466	-0.0234134	0.183856	NaN	NaN	NaN	4.2332e-39	377720000	236390000	141340000	1	1	2	1	2	1	2	0	3	3	4	9	5	4	6	0	0	1	10	25.9	25.9	55.21	0	1.61304
RPL36	60S ribosomal protein L36	Q9Y3U8;J3QSB5;J3KTD3	Q9Y3U8;J3QSB5	-0.575246	-0.590459	-0.656993	-0.308098	-0.375831	-0.574059	-0.241251	-0.290481	-0.362632	-0.381217	-0.272395	-0.144187	-0.386083	-0.385346	-0.483491	0.00976399	-0.021923	0.0554391	9.7142e-272	55261000000	32157000000	23103000000	9	8	8	9	8	9	8	8	8	9	8	10	9	8	9	10	8	8	11	44.8	44.8	12.254	0	0.214628
TLN1	Talin-1	Q9Y490;H0YMT1;Q9Y4G6	Q9Y490	-0.114235	-0.102812	-0.216202	0.0680364	-0.112678	-0.0525517	0.0884533	0.203113	-0.0722364	0.064537	0.104964	0.0677315	-0.0445845	0.0490279	0.0513734	NaN	NaN	0.0242178	4.5073e-269	1882800000	1189600000	693220000	10	4	5	5	5	4	4	2	6	25	18	34	22	24	23	1	1	3	42	23.7	23.7	269.76	0	0.0616834
USP15	Ubiquitin carboxyl-terminal hydrolase 15	Q9Y4E8-2;Q9Y4E8-3;Q9Y4E8;Q9Y4E8-4;H0YI31;F8W0H4;F8VZG8;F8VVY7;H0YI26	Q9Y4E8-2;Q9Y4E8-3;Q9Y4E8	0.580235	0.529087	0.608175	0.646223	0.653454	0.777332	0.434209	0.267417	0.335108	-1.9475	-1.58712	-1.79212	-2.96256	-3.11744	-2.78463	0.0813364	-0.225143	-0.145992	1.3108e-160	2779200000	1648200000	1131000000	19	13	12	15	11	15	16	8	13	10	7	7	6	6	5	10	8	11	24	33.5	33.5	109.3	0	0.0732189
LAS1L	Ribosomal biogenesis protein LAS1L	Q9Y4W2-2;Q9Y4W2;Q9Y4W2-3;Q9Y4W2-4	Q9Y4W2-2;Q9Y4W2;Q9Y4W2-3	0.453278	0.275471	0.0137222	-0.23654	NaN	-0.339475	NaN	NaN	0.255783	0.204201	-0.279318	-0.521669	0.458094	0.111767	0.342501	0.205539	NaN	NaN	2.069e-22	368300000	229610000	138680000	4	3	3	2	1	2	2	1	3	3	2	2	4	5	3	2	1	1	7	12.3	12.3	81.242	0	-0.563478
PPME1	Protein phosphatase methylesterase 1	Q9Y570;Q9Y570-4;Q9Y570-2;Q9Y570-3	Q9Y570;Q9Y570-4;Q9Y570-2	NaN	NaN	NaN	-0.365358	NaN	-0.0155567	NaN	NaN	NaN	0.466857	NaN	0.360572	0.642637	0.52552	0.594863	NaN	0.127414	NaN	1.954e-18	603670000	392800000	210860000	0	1	1	2	0	2	1	0	1	3	1	4	2	4	3	1	2	0	5	13.5	13.5	42.315	NaN	NaN
USP16	Ubiquitin carboxyl-terminal hydrolase 16	Q9Y5T5;Q9Y5T5-4;Q9Y5T5-5;H9KVB6	Q9Y5T5;Q9Y5T5-4;Q9Y5T5-5	0.212787	0.13212	0.318151	-0.560182	-0.517906	-0.632357	-3.10346	-2.7827	-2.81317	-4.59702	-3.76066	-3.87089	-3.86353	-4.5845	-4.43114	0.0262344	0.0373544	0.000423759	7.929e-291	6914200000	4238200000	2676000000	19	17	14	17	16	18	7	7	10	9	7	11	9	8	10	17	14	18	2	42	42	93.569	0	-0.772969
SNX8	Sorting nexin-8	Q9Y5X2;C9J8E6;C9J014;C9J271;C9JCB9;C9IYC5	Q9Y5X2;C9J8E6;C9J014;C9J271	0.201678	0.00460666	0.0327668	-0.0251792	0.0789986	0.0638656	-0.0706837	-0.0212362	0.0607326	-0.389132	-0.476878	-0.481869	-0.819745	-0.838881	-0.800511	-0.204094	-0.382257	-0.238397	6.0357e-76	1193600000	677010000	516610000	5	6	4	6	7	9	8	5	4	6	5	7	6	6	6	6	3	5	13	31.8	31.8	52.569	0	0.0310988
AUP1	Ancient ubiquitous protein 1	Q9Y679-2;Q9Y679;Q9Y679-3	Q9Y679-2;Q9Y679;Q9Y679-3	0.706723	NaN	0.21173	NaN	0.751216	NaN	0.987058	NaN	NaN	NaN	NaN	NaN	NaN	NaN	NaN	NaN	NaN	NaN	7.5443e-15	240650000	151220000	89429000	3	1	2	1	2	1	2	0	1	1	1	2	0	1	1	1	1	1	6	16.3	16.3	45.786	0	0.291989
CLIC4	Chloride intracellular channel protein 4	Q9Y696	Q9Y696	0.755137	0.720652	0.632559	1.02859	0.956924	0.892547	1.10115	0.956803	0.909269	0.751761	0.632003	0.565592	0.490891	0.496102	0.630291	-0.0481311	0.179441	0.0959913	0	3444700000	2480700000	963960000	9	6	5	9	6	7	6	5	7	8	8	9	8	6	10	5	4	8	15	77.5	77.5	28.772	0	0.236272
SPCS1	Signal peptidase complex subunit 1	Q9Y6A9;C9JBL1;X6R2S6	Q9Y6A9;C9JBL1;X6R2S6	-0.161394	-0.211199	-0.377517	0.0482033	0.124723	0.0678197	-0.160574	NaN	-0.215344	-0.0515215	0.0701375	0.186621	0.0473749	NaN	-0.0243926	0.171808	0.0558197	0.0957222	5.5969e-23	481690000	298800000	182890000	2	2	2	2	2	2	2	1	2	2	2	2	2	0	2	2	2	2	2	31.4	31.4	11.805	0	0.279019
MTCH2	Mitochondrial carrier homolog 2	Q9Y6C9;E9PIE4	Q9Y6C9;E9PIE4	0.236161	0.415797	0.455258	0.470017	0.289949	0.41669	0.508884	0.308847	0.248923	0.297992	0.247144	0.228838	0.37465	0.415185	0.338081	-0.0812189	-0.00506252	-0.215697	2.6629e-215	4576300000	3146000000	1430300000	6	6	6	7	5	6	5	4	5	7	6	7	8	6	6	3	2	2	8	40.6	40.6	33.331	0	0.000892788
DYNC1LI1	Cytoplasmic dynein 1 light intermediate chain 1	Q9Y6G9;E9PHI6;C9JGM7;C9JLW1;B4E2E0;O43237	Q9Y6G9;E9PHI6	0.0891482	-0.0123132	0.0426364	-0.29571	-0.00620568	-0.0214321	-0.170695	-0.167991	0.0838094	0.158863	0.111518	0.153426	0.032861	0.0964079	0.105213	0.0175823	-0.111947	-0.087826	1.027e-179	4890400000	3112700000	1777700000	17	12	11	17	14	15	14	13	15	15	10	14	14	11	14	12	7	12	20	53	53	56.578	0	-0.0640684
TAF6L	TAF6-like RNA polymerase II p300/CBP-associated factor-associated factor 65 kDa subunit 6L	Q9Y6J9;E9PP94	Q9Y6J9	NaN	0.176643	NaN	NaN	NaN	-3.25481	NaN	NaN	NaN	NaN	NaN	0.829728	-6.5516	-3.51842	NaN	NaN	NaN	NaN	2.6252e-20	1486600000	735760000	750870000	1	3	1	1	1	2	1	0	0	2	2	2	3	2	1	1	1	1	5	11.4	11.4	67.814	0	-3.43146
[truncated: 4 more columns]
